# Supplementary material
Source: publisher figshare collection journal article supplement (https://acs.figshare.com/ndownloader/files/3601761)
Supplement: Supplementary file 1 [file 3601761]

data_Baran102
_audit_creation_date              2013-12-10
_audit_creation_method
;
Olex2 1.2-beta
(compiled 2013.11.15 svn.r2834 for OlexSys, GUI svn.r4720)
;
_shelxl_version_number            2013-4
_publ_contact_author_address      ?
_publ_contact_author_email        ?
_publ_contact_author_name         ''
_publ_contact_author_phone        ?
_publ_section_references
;
Dolomanov, O.V., Bourhis, L.J., Gildea, R.J, Howard, J.A.K. & Puschmann, H.
 (2009), J. Appl. Cryst. 42, 339-341.

Sheldrick, G.M. (2008). Acta Cryst. A64, 112-122
;
_chemical_name_common             ?
_chemical_name_systematic
;
 ?
;
_chemical_formula_moiety          'C44 H36 N4 O5 S2, C H2 Cl2'
_chemical_formula_sum             'C45 H38 Cl2 N4 O5 S2'
_chemical_formula_weight          849.81
_chemical_melting_point           ?
loop_
  _atom_type_symbol
  _atom_type_description
  _atom_type_scat_dispersion_real
  _atom_type_scat_dispersion_imag
  _atom_type_scat_source
 'C' 'C' 0.0033 0.0016 'International Tables Vol C Tables 4.2.6.8 and 6.1.1.4'
 'H' 'H' 0.0000 0.0000 'International Tables Vol C Tables 4.2.6.8 and 6.1.1.4'
 'N' 'N' 0.0061 0.0033 'International Tables Vol C Tables 4.2.6.8 and 6.1.1.4'
 'O' 'O' 0.0106 0.0060 'International Tables Vol C Tables 4.2.6.8 and 6.1.1.4'
 'S' 'S' 0.1246 0.1234 'International Tables Vol C Tables 4.2.6.8 and 6.1.1.4'
 'Cl' 'Cl' 0.1484 0.1585 'International Tables Vol C Tables 4.2.6.8 and 6.1.1.4'

_shelx_space_group_comment
;
The symmetry employed for this shelxl refinement is uniquely defined
by the following loop, which should always be used as a source of
symmetry information in preference to the above space-group names.
They are only intended as comments.
;
_space_group_crystal_system       'triclinic'
_space_group_IT_number            2
_space_group_name_H-M_alt         'P -1'
_space_group_name_Hall            '-P 1'
loop_
  _space_group_symop_operation_xyz
 'x, y, z'
 '-x, -y, -z'

_cell_length_a                    9.969(8)
_cell_length_b                    15.383(12)
_cell_length_c                    15.774(15)
_cell_angle_alpha                 110.732(14)
_cell_angle_beta                  108.300(10)
_cell_angle_gamma                 100.249(10)
_cell_volume                      2031(3)
_cell_formula_units_Z             2
_cell_measurement_reflns_used     9809
_cell_measurement_temperature     100
_cell_measurement_theta_max       27.937
_cell_measurement_theta_min       2.281
_shelx_estimated_absorpt_T_max    0.968
_shelx_estimated_absorpt_T_min    0.873
_exptl_absorpt_coefficient_mu     0.315
_exptl_absorpt_correction_T_max   0.7456
_exptl_absorpt_correction_T_min   0.6031
_exptl_absorpt_correction_type    multi-scan
_exptl_absorpt_process_details
;
SADABS-2008/1 (Bruker,2008) was used for absorption correction.
wR2(int) was 0.0946 before and 0.0692 after correction.
The Ratio of minimum to maximum transmission is 0.8089.
The \l/2 correction factor is Not present.
;
_exptl_crystal_colour             Colorless
_exptl_crystal_colour_primary     Colorless
_exptl_crystal_density_diffrn     1.390
_exptl_crystal_density_meas       .
_exptl_crystal_density_method     ?
_exptl_crystal_description        Plate
_exptl_crystal_F_000              884
_exptl_crystal_size_max           0.442
_exptl_crystal_size_mid           0.331
_exptl_crystal_size_min           0.105
_exptl_special_details
;
 ?
;
_exptl_transmission_factor_max    ?
_exptl_transmission_factor_min    ?
_diffrn_reflns_av_R_equivalents   0.0510
_diffrn_reflns_av_unetI/netI      0.0494
_diffrn_reflns_Laue_measured_fraction_full 0.973
_diffrn_reflns_Laue_measured_fraction_max 0.890
_diffrn_reflns_limit_h_max        12
_diffrn_reflns_limit_h_min        -12
_diffrn_reflns_limit_k_max        19
_diffrn_reflns_limit_k_min        -20
_diffrn_reflns_limit_l_max        20
_diffrn_reflns_limit_l_min        -20
_diffrn_reflns_number             28205
_diffrn_reflns_point_group_measured_fraction_full 0.973
_diffrn_reflns_point_group_measured_fraction_max 0.890
_diffrn_reflns_theta_full         25.000
_diffrn_reflns_theta_max          28.152
_diffrn_reflns_theta_min          1.497
_diffrn_ambient_temperature       100
_diffrn_detector                  'Bruker APEX CCD'
_diffrn_detector_area_resol_mean  8.0
_diffrn_detector_type             'CCD Area Detector'
_diffrn_measured_fraction_theta_full 0.973
_diffrn_measured_fraction_theta_max 0.890
_diffrn_measurement_device        'Siemens P4 Four-Circle Diffractometer'
_diffrn_measurement_device_type   'Bruker P4 APEX Mo'
_diffrn_measurement_method        '\f and \w scans'
_diffrn_radiation_monochromator   graphite
_diffrn_radiation_probe           X-ray
_diffrn_radiation_type            MoK\a
_diffrn_radiation_wavelength      0.71073
_diffrn_source                    'sealed tube'
_diffrn_source_type               fine-focus
_diffrn_standards_number          0
_reflns_Friedel_coverage          0.000
_reflns_Friedel_fraction_full     .
_reflns_Friedel_fraction_max      .
_reflns_number_gt                 7111
_reflns_number_total              8867
_reflns_special_details
;
 Reflections were merged by SHELXL according to the crystal
 class for the calculation of statistics and refinement.
 
 _reflns_Friedel_fraction is defined as the number of unique
 Friedel pairs measured divided by the number that would be
 possible theoretically, ignoring centric projections and
 systematic absences.
;
_reflns_threshold_expression      'I > 2\s(I)'
_computing_cell_refinement        'SAINT v7.56A (Bruker, 2009)'
_computing_data_collection        'APEX2 (Bruker, 2009)'
_computing_data_reduction         'SAINT v7.56A (Bruker, 2009)'
_computing_molecular_graphics     'Olex2 (Dolomanov et al., 2009)'
_computing_publication_material   'Olex2 (Dolomanov et al., 2009)'
_computing_structure_refinement   'XL (Sheldrick, 2008)'
_computing_structure_solution     'XS (Sheldrick, 2008)'
_refine_diff_density_max          0.372
_refine_diff_density_min          -0.511
_refine_diff_density_rms          0.068
_refine_ls_extinction_coef        .
_refine_ls_extinction_method      none
_refine_ls_goodness_of_fit_ref    1.020
_refine_ls_hydrogen_treatment     mixed
_refine_ls_matrix_type            full
_refine_ls_number_parameters      498
_refine_ls_number_reflns          8867
_refine_ls_number_restraints      0
_refine_ls_R_factor_all           0.0633
_refine_ls_R_factor_gt            0.0528
_refine_ls_restrained_S_all       1.020
_refine_ls_shift/su_max           0.001
_refine_ls_shift/su_mean          0.000
_refine_ls_structure_factor_coef  Fsqd
_refine_ls_weighting_details
'w=1/[\s^2^(Fo^2^)+(0.1031P)^2^+0.7912P] where P=(Fo^2^+2Fc^2^)/3'
_refine_ls_weighting_scheme       calc
_refine_ls_wR_factor_gt           0.1608
_refine_ls_wR_factor_ref          0.1711
_refine_special_details
;
 ?
;
_olex2_refinement_description
;
1. Fixed Uiso
 At 1.2 times of:
  All C(H) groups, All C(H,H) groups, All N(H) groups
 At 1.5 times of:
  All C(H,H,H) groups
2.a Ternary CH refined with riding coordinates:
 C16(H16), C18(H18), C19(H19)
2.b Secondary CH2 refined with riding coordinates:
 C17(H17A,H17B)
2.c Aromatic/amide H refined with riding coordinates:
 N2(H2), C3(H3), C4(H4), C6(H6), C7(H7), C9(H9), C10(H10), C11(H11), C12(H12),
 C15(H15), C22(H22), C23(H23), C24(H24), C26(H26), C27(H27), C28(H28), C32(H32),
  C33(H33), C34(H34), C35(H35), C37(H37), C39(H39), C40(H40), C42(H42), C43(H43)
2.d Idealised Me refined as rotating group:
 C1(H1A,H1B,H1C), C44(H44A,H44B,H44C)
;
_atom_sites_solution_hydrogens    geom
_atom_sites_solution_primary      direct
_atom_sites_solution_secondary    difmap

loop_
  _platon_squeeze_void_nr
  _platon_squeeze_void_average_x
  _platon_squeeze_void_average_y
  _platon_squeeze_void_average_z
  _platon_squeeze_void_volume
  _platon_squeeze_void_count_electrons
  _platon_squeeze_void_content
   1  0.027  0.500  1.000       236        76 '2 Molecules of Dichloromethane'
_platon_squeeze_details                           
;
 SQUEEZE found one void was found containing 2 disordered molecules of  dichloromethane. 
 Their formula was added to the formula for the unit-cell and the  electron density removed.
;

loop_
  _atom_site_label
  _atom_site_type_symbol
  _atom_site_fract_x
  _atom_site_fract_y
  _atom_site_fract_z
  _atom_site_U_iso_or_equiv
  _atom_site_adp_type
  _atom_site_occupancy
  _atom_site_site_symmetry_order
  _atom_site_calc_flag
  _atom_site_refinement_flags_posn
  _atom_site_refinement_flags_adp
  _atom_site_refinement_flags_occupancy
  _atom_site_disorder_assembly
  _atom_site_disorder_group
 S1 S 0.63269(6) -0.13597(4) 0.31320(4) 0.02757(14) Uani 1 1 d . . . . .
 S2 S 0.79928(7) 0.51773(4) 0.31485(4) 0.03201(15) Uani 1 1 d . . . . .
 O1 O 0.59050(19) -0.22884(12) 0.31650(14) 0.0370(4) Uani 1 1 d . . . . .
 O2 O 0.78798(17) -0.07610(12) 0.36261(13) 0.0356(4) Uani 1 1 d . . . . .
 O3 O 0.43234(17) 0.12357(11) 0.25018(11) 0.0290(3) Uani 1 1 d . . . . .
 O4 O 0.7438(2) 0.54212(13) 0.23358(13) 0.0458(5) Uani 1 1 d . . . . .
 O5 O 0.8985(2) 0.46009(12) 0.31642(13) 0.0391(4) Uani 1 1 d . . . . .
 N1 N 0.54499(18) -0.06639(12) 0.36558(13) 0.0235(3) Uani 1 1 d . . . . .
 N2 N 0.22448(19) 0.17262(13) 0.21945(13) 0.0267(4) Uani 1 1 d . . . . .
 H2 H 0.1698 0.1997 0.2480 0.032 Uiso 1 1 calc R . . . .
 N3 N 0.0294(2) 0.25116(14) 0.13960(14) 0.0311(4) Uani 1 1 d . . . . .
 N4 N 0.6523(2) 0.45271(13) 0.31968(14) 0.0296(4) Uani 1 1 d . . . . .
 C1 C 0.4074(4) -0.2087(2) -0.1209(2) 0.0615(9) Uani 1 1 d . . . . .
 H1A H 0.4030 -0.1473 -0.1255 0.092 Uiso 1 1 calc GR . . . .
 H1B H 0.3073 -0.2577 -0.1578 0.092 Uiso 1 1 calc GR . . . .
 H1C H 0.4753 -0.2331 -0.1491 0.092 Uiso 1 1 calc GR . . . .
 C2 C 0.4644(3) -0.18975(19) -0.01188(19) 0.0443(6) Uani 1 1 d . . . . .
 C3 C 0.5061(4) -0.2611(2) 0.0171(2) 0.0542(8) Uani 1 1 d . . . . .
 H3 H 0.5013 -0.3211 -0.0316 0.065 Uiso 1 1 calc R . . . .
 C4 C 0.5542(4) -0.2452(2) 0.1157(2) 0.0478(7) Uani 1 1 d . . . . .
 H4 H 0.5819 -0.2939 0.1344 0.057 Uiso 1 1 calc R . . . .
 C5 C 0.5613(3) -0.15649(16) 0.18733(17) 0.0307(5) Uani 1 1 d . . . . .
 C6 C 0.5194(2) -0.08475(16) 0.16045(17) 0.0310(5) Uani 1 1 d . . . . .
 H6 H 0.5238 -0.0249 0.2090 0.037 Uiso 1 1 calc R . . . .
 C7 C 0.4707(3) -0.10310(18) 0.06014(18) 0.0366(5) Uani 1 1 d . . . . .
 H7 H 0.4412 -0.0550 0.0411 0.044 Uiso 1 1 calc R . . . .
 C8 C 0.3920(2) -0.09799(15) 0.34837(15) 0.0221(4) Uani 1 1 d . . . . .
 C9 C 0.2938(2) -0.19252(15) 0.31317(16) 0.0269(4) Uani 1 1 d . . . . .
 H9 H 0.3223 -0.2495 0.2913 0.032 Uiso 1 1 calc R . . . .
 C10 C 0.1521(2) -0.19852(17) 0.31196(18) 0.0325(5) Uani 1 1 d . . . . .
 H10 H 0.0824 -0.2613 0.2889 0.039 Uiso 1 1 calc R . . . .
 C11 C 0.1090(2) -0.11430(19) 0.34384(19) 0.0347(5) Uani 1 1 d . . . . .
 H11 H 0.0113 -0.1214 0.3419 0.042 Uiso 1 1 calc R . . . .
 C12 C 0.2077(2) -0.02084(16) 0.37818(17) 0.0283(4) Uani 1 1 d . . . . .
 H12 H 0.1781 0.0357 0.3992 0.034 Uiso 1 1 calc R . . . .
 C13 C 0.3523(2) -0.01196(15) 0.38109(15) 0.0238(4) Uani 1 1 d . . . . .
 C14 C 0.4816(2) 0.07275(14) 0.41567(15) 0.0227(4) Uani 1 1 d . . . . .
 C15 C 0.5946(2) 0.03840(15) 0.40488(15) 0.0235(4) Uani 1 1 d . . . . .
 H15 H 0.6919 0.0781 0.4210 0.028 Uiso 1 1 calc R . . . .
 C16 C 0.4873(2) 0.17809(15) 0.45747(15) 0.0241(4) Uani 1 1 d . . . . .
 H16 H 0.4708 0.1942 0.5198 0.029 Uiso 1 1 calc R . . . .
 C17 C 0.6251(2) 0.26069(15) 0.47767(16) 0.0269(4) Uani 1 1 d . . . . .
 H17A H 0.6752 0.2395 0.4325 0.032 Uiso 1 1 calc R . . . .
 H17B H 0.6981 0.2953 0.5480 0.032 Uiso 1 1 calc R . . . .
 C18 C 0.5165(2) 0.31659(14) 0.44752(15) 0.0251(4) Uani 1 1 d . . . . .
 H18 H 0.5056 0.3592 0.5080 0.030 Uiso 1 1 calc R . . . .
 C19 C 0.3830(2) 0.21584(14) 0.39023(15) 0.0227(4) Uani 1 1 d . . . . .
 H19 H 0.2919 0.2209 0.4030 0.027 Uiso 1 1 calc R . . . .
 C20 C 0.3510(2) 0.16517(14) 0.28085(15) 0.0227(4) Uani 1 1 d . . . . .
 C21 C 0.1732(2) 0.14163(16) 0.11599(16) 0.0296(5) Uani 1 1 d . . . . .
 C22 C 0.2146(3) 0.0728(2) 0.05428(18) 0.0442(6) Uani 1 1 d . . . . .
 H22 H 0.2814 0.0429 0.0809 0.053 Uiso 1 1 calc R . . . .
 C23 C 0.1570(3) 0.0473(2) -0.04841(19) 0.0558(8) Uani 1 1 d . . . . .
 H23 H 0.1866 0.0004 -0.0901 0.067 Uiso 1 1 calc R . . . .
 C24 C 0.0590(3) 0.0885(2) -0.08991(19) 0.0498(7) Uani 1 1 d . . . . .
 H24 H 0.0229 0.0706 -0.1591 0.060 Uiso 1 1 calc R . . . .
 C25 C 0.0121(3) 0.1581(2) -0.02838(18) 0.0380(5) Uani 1 1 d . . . . .
 C26 C -0.0889(3) 0.2042(2) -0.06488(19) 0.0441(6) Uani 1 1 d . . . . .
 H26 H -0.1310 0.1878 -0.1338 0.053 Uiso 1 1 calc R . . . .
 C27 C -0.1249(3) 0.2724(2) -0.0002(2) 0.0456(6) Uani 1 1 d . . . . .
 H27 H -0.1902 0.3049 -0.0232 0.055 Uiso 1 1 calc R . . . .
 C28 C -0.0632(3) 0.29335(19) 0.1014(2) 0.0395(5) Uani 1 1 d . . . . .
 H28 H -0.0893 0.3406 0.1455 0.047 Uiso 1 1 calc R . . . .
 C29 C 0.0692(2) 0.18502(16) 0.07547(16) 0.0279(4) Uani 1 1 d . . . . .
 C30 C 0.5460(2) 0.37642(14) 0.39427(15) 0.0249(4) Uani 1 1 d . . . . .
 C31 C 0.4506(2) 0.42892(14) 0.35776(16) 0.0277(4) Uani 1 1 d . . . . .
 C32 C 0.3139(2) 0.43709(15) 0.35910(18) 0.0333(5) Uani 1 1 d . . . . .
 H32 H 0.2660 0.4054 0.3888 0.040 Uiso 1 1 calc R . . . .
 C33 C 0.2488(3) 0.49298(17) 0.3158(2) 0.0425(6) Uani 1 1 d . . . . .
 H33 H 0.1553 0.4986 0.3155 0.051 Uiso 1 1 calc R . . . .
 C34 C 0.3195(3) 0.54054(17) 0.2730(2) 0.0466(7) Uani 1 1 d . . . . .
 H34 H 0.2727 0.5779 0.2442 0.056 Uiso 1 1 calc R . . . .
 C35 C 0.4566(3) 0.53466(17) 0.27145(19) 0.0410(6) Uani 1 1 d . . . . .
 H35 H 0.5050 0.5678 0.2431 0.049 Uiso 1 1 calc R . . . .
 C36 C 0.5195(2) 0.47740(15) 0.31377(17) 0.0303(5) Uani 1 1 d . . . . .
 C37 C 0.6653(2) 0.39283(14) 0.37096(15) 0.0262(4) Uani 1 1 d . . . . .
 H37 H 0.7457 0.3679 0.3866 0.031 Uiso 1 1 calc R . . . .
 C38 C 0.8817(2) 0.62734(15) 0.42710(16) 0.0271(4) Uani 1 1 d . . . . .
 C39 C 0.8936(2) 0.71799(15) 0.42429(17) 0.0278(4) Uani 1 1 d . . . . .
 H39 H 0.8540 0.7213 0.3627 0.033 Uiso 1 1 calc R . . . .
 C40 C 0.9648(2) 0.80404(15) 0.51388(17) 0.0287(4) Uani 1 1 d . . . . .
 H40 H 0.9747 0.8662 0.5128 0.034 Uiso 1 1 calc R . . . .
 C41 C 1.0214(2) 0.79969(15) 0.60449(17) 0.0284(4) Uani 1 1 d . . . . .
 C42 C 1.0044(2) 0.70673(16) 0.60544(17) 0.0301(4) Uani 1 1 d . . . . .
 H42 H 1.0403 0.7030 0.6670 0.036 Uiso 1 1 calc R . . . .
 C43 C 0.9357(3) 0.62090(16) 0.51709(17) 0.0315(5) Uani 1 1 d . . . . .
 H43 H 0.9256 0.5586 0.5178 0.038 Uiso 1 1 calc R . . . .
 C44 C 1.0972(3) 0.89216(17) 0.70133(18) 0.0368(5) Uani 1 1 d . . . . .
 H44A H 1.1017 0.9498 0.6877 0.055 Uiso 1 1 calc GR . . . .
 H44B H 1.1988 0.8944 0.7371 0.055 Uiso 1 1 calc GR . . . .
 H44C H 1.0404 0.8923 0.7420 0.055 Uiso 1 1 calc GR . . . .

loop_
  _atom_site_aniso_label
  _atom_site_aniso_U_11
  _atom_site_aniso_U_22
  _atom_site_aniso_U_33
  _atom_site_aniso_U_23
  _atom_site_aniso_U_13
  _atom_site_aniso_U_12
 S1 0.0284(3) 0.0295(3) 0.0324(3) 0.0154(2) 0.0158(2) 0.0165(2)
 S2 0.0430(3) 0.0261(3) 0.0230(3) 0.0106(2) 0.0128(2) 0.0041(2)
 O1 0.0440(9) 0.0330(8) 0.0473(10) 0.0229(8) 0.0234(8) 0.0223(7)
 O2 0.0280(8) 0.0428(9) 0.0416(10) 0.0195(8) 0.0160(7) 0.0188(7)
 O3 0.0333(8) 0.0346(8) 0.0276(8) 0.0159(7) 0.0162(7) 0.0178(6)
 O4 0.0634(12) 0.0390(9) 0.0259(9) 0.0169(8) 0.0121(9) 0.0022(8)
 O5 0.0496(10) 0.0318(8) 0.0370(9) 0.0116(7) 0.0248(8) 0.0104(7)
 N1 0.0223(8) 0.0241(8) 0.0269(9) 0.0121(7) 0.0106(7) 0.0109(6)
 N2 0.0255(8) 0.0303(9) 0.0184(8) 0.0060(7) 0.0069(7) 0.0101(7)
 N3 0.0286(9) 0.0323(9) 0.0276(10) 0.0121(8) 0.0076(8) 0.0087(7)
 N4 0.0346(10) 0.0244(8) 0.0260(9) 0.0138(7) 0.0073(8) 0.0053(7)
 C1 0.079(2) 0.0571(18) 0.0295(14) 0.0101(13) 0.0228(15) -0.0030(16)
 C2 0.0525(15) 0.0407(13) 0.0312(13) 0.0086(11) 0.0226(12) 0.0013(11)
 C3 0.077(2) 0.0428(14) 0.0396(15) 0.0057(12) 0.0346(15) 0.0182(14)
 C4 0.0717(19) 0.0381(13) 0.0442(15) 0.0159(12) 0.0342(15) 0.0269(13)
 C5 0.0336(11) 0.0306(11) 0.0291(11) 0.0106(9) 0.0167(10) 0.0113(9)
 C6 0.0320(11) 0.0313(11) 0.0288(11) 0.0103(9) 0.0149(10) 0.0098(9)
 C7 0.0395(12) 0.0371(12) 0.0284(12) 0.0125(10) 0.0145(10) 0.0049(10)
 C8 0.0219(9) 0.0292(10) 0.0196(9) 0.0147(8) 0.0077(8) 0.0112(8)
 C9 0.0303(10) 0.0275(10) 0.0241(10) 0.0143(8) 0.0093(9) 0.0088(8)
 C10 0.0271(10) 0.0367(11) 0.0351(12) 0.0215(10) 0.0096(10) 0.0073(9)
 C11 0.0249(10) 0.0498(14) 0.0429(14) 0.0306(12) 0.0165(10) 0.0164(10)
 C12 0.0269(10) 0.0362(11) 0.0349(12) 0.0224(10) 0.0168(9) 0.0178(9)
 C13 0.0252(10) 0.0299(10) 0.0222(10) 0.0154(8) 0.0101(8) 0.0129(8)
 C14 0.0258(9) 0.0261(9) 0.0219(10) 0.0145(8) 0.0103(8) 0.0122(8)
 C15 0.0252(9) 0.0260(9) 0.0225(10) 0.0130(8) 0.0102(8) 0.0096(8)
 C16 0.0283(10) 0.0267(10) 0.0214(10) 0.0133(8) 0.0105(8) 0.0115(8)
 C17 0.0283(10) 0.0259(10) 0.0248(10) 0.0117(8) 0.0069(9) 0.0110(8)
 C18 0.0279(10) 0.0216(9) 0.0228(10) 0.0088(8) 0.0079(8) 0.0081(8)
 C19 0.0247(9) 0.0230(9) 0.0224(10) 0.0112(8) 0.0098(8) 0.0097(7)
 C20 0.0238(9) 0.0195(9) 0.0245(10) 0.0105(8) 0.0095(8) 0.0052(7)
 C21 0.0251(10) 0.0341(11) 0.0206(10) 0.0065(9) 0.0061(9) 0.0072(8)
 C22 0.0339(12) 0.0548(15) 0.0234(12) 0.0011(11) 0.0030(10) 0.0185(11)
 C23 0.0434(15) 0.076(2) 0.0222(12) -0.0031(13) 0.0080(11) 0.0245(14)
 C24 0.0406(14) 0.0710(19) 0.0197(12) 0.0060(12) 0.0088(11) 0.0138(13)
 C25 0.0282(11) 0.0521(14) 0.0233(11) 0.0121(10) 0.0067(9) 0.0065(10)
 C26 0.0331(12) 0.0662(17) 0.0248(12) 0.0230(12) 0.0021(10) 0.0094(12)
 C27 0.0364(13) 0.0591(17) 0.0381(15) 0.0277(13) 0.0041(11) 0.0157(12)
 C28 0.0334(12) 0.0441(13) 0.0370(14) 0.0170(11) 0.0083(11) 0.0164(10)
 C29 0.0241(10) 0.0315(10) 0.0202(10) 0.0080(8) 0.0058(8) 0.0043(8)
 C30 0.0278(10) 0.0177(8) 0.0190(10) 0.0039(8) 0.0031(8) 0.0051(7)
 C31 0.0273(10) 0.0198(9) 0.0208(10) 0.0049(8) -0.0021(8) 0.0036(8)
 C32 0.0294(11) 0.0220(10) 0.0364(13) 0.0090(9) 0.0042(10) 0.0061(8)
 C33 0.0316(12) 0.0253(11) 0.0495(16) 0.0110(11) -0.0027(11) 0.0086(9)
 C34 0.0428(14) 0.0250(11) 0.0465(16) 0.0141(11) -0.0094(12) 0.0078(10)
 C35 0.0455(14) 0.0248(10) 0.0351(13) 0.0149(10) -0.0023(11) 0.0031(10)
 C36 0.0307(11) 0.0209(9) 0.0259(11) 0.0092(8) -0.0005(9) 0.0030(8)
 C37 0.0310(10) 0.0216(9) 0.0222(10) 0.0104(8) 0.0059(9) 0.0071(8)
 C38 0.0303(10) 0.0258(10) 0.0235(10) 0.0119(8) 0.0099(9) 0.0054(8)
 C39 0.0296(10) 0.0295(10) 0.0308(11) 0.0181(9) 0.0141(9) 0.0106(8)
 C40 0.0279(10) 0.0251(10) 0.0340(12) 0.0134(9) 0.0130(9) 0.0093(8)
 C41 0.0240(10) 0.0268(10) 0.0324(12) 0.0098(9) 0.0131(9) 0.0072(8)
 C42 0.0317(11) 0.0313(11) 0.0240(11) 0.0127(9) 0.0090(9) 0.0062(9)
 C43 0.0404(12) 0.0268(10) 0.0267(11) 0.0152(9) 0.0114(10) 0.0066(9)
 C44 0.0376(12) 0.0318(11) 0.0310(12) 0.0070(10) 0.0138(10) 0.0035(9)

_geom_special_details
;
 All esds (except the esd in the dihedral angle between two l.s. planes)
 are estimated using the full covariance matrix.  The cell esds are taken
 into account individually in the estimation of esds in distances, angles
 and torsion angles; correlations between esds in cell parameters are only
 used when they are defined by crystal symmetry.  An approximate (isotropic)
 treatment of cell esds is used for estimating esds involving l.s. planes.
;
loop_
  _geom_bond_atom_site_label_1
  _geom_bond_atom_site_label_2
  _geom_bond_distance
  _geom_bond_site_symmetry_2
  _geom_bond_publ_flag
 S1 O1 1.440(2) . ?
 S1 O2 1.442(2) . ?
 S1 N1 1.6592(18) . ?
 S1 C5 1.771(3) . ?
 S2 O4 1.435(2) . ?
 S2 O5 1.441(2) . ?
 S2 N4 1.660(2) . ?
 S2 C38 1.770(2) . ?
 O3 C20 1.230(2) . ?
 N1 C8 1.420(3) . ?
 N1 C15 1.430(3) . ?
 N2 H2 0.8800 . ?
 N2 C20 1.380(3) . ?
 N2 C21 1.411(3) . ?
 N3 C28 1.333(3) . ?
 N3 C29 1.372(3) . ?
 N4 C36 1.425(3) . ?
 N4 C37 1.423(3) . ?
 C1 H1A 0.9800 . ?
 C1 H1B 0.9800 . ?
 C1 H1C 0.9800 . ?
 C1 C2 1.529(4) . ?
 C2 C3 1.408(4) . ?
 C2 C7 1.388(4) . ?
 C3 H3 0.9500 . ?
 C3 C4 1.390(4) . ?
 C4 H4 0.9500 . ?
 C4 C5 1.403(3) . ?
 C5 C6 1.399(3) . ?
 C6 H6 0.9500 . ?
 C6 C7 1.404(3) . ?
 C7 H7 0.9500 . ?
 C8 C9 1.401(3) . ?
 C8 C13 1.416(3) . ?
 C9 H9 0.9500 . ?
 C9 C10 1.392(3) . ?
 C10 H10 0.9500 . ?
 C10 C11 1.410(3) . ?
 C11 H11 0.9500 . ?
 C11 C12 1.392(3) . ?
 C12 H12 0.9500 . ?
 C12 C13 1.408(3) . ?
 C13 C14 1.454(3) . ?
 C14 C15 1.358(3) . ?
 C14 C16 1.500(3) . ?
 C15 H15 0.9500 . ?
 C16 H16 1.0000 . ?
 C16 C17 1.556(3) . ?
 C16 C19 1.582(3) . ?
 C17 H17A 0.9900 . ?
 C17 H17B 0.9900 . ?
 C17 C18 1.560(3) . ?
 C18 H18 1.0000 . ?
 C18 C19 1.584(3) . ?
 C18 C30 1.498(3) . ?
 C19 H19 1.0000 . ?
 C19 C20 1.517(3) . ?
 C21 C22 1.384(3) . ?
 C21 C29 1.435(3) . ?
 C22 H22 0.9500 . ?
 C22 C23 1.412(4) . ?
 C23 H23 0.9500 . ?
 C23 C24 1.376(4) . ?
 C24 H24 0.9500 . ?
 C24 C25 1.427(4) . ?
 C25 C26 1.424(4) . ?
 C25 C29 1.424(3) . ?
 C26 H26 0.9500 . ?
 C26 C27 1.370(4) . ?
 C27 H27 0.9500 . ?
 C27 C28 1.413(4) . ?
 C28 H28 0.9500 . ?
 C30 C31 1.465(3) . ?
 C30 C37 1.360(3) . ?
 C31 C32 1.397(3) . ?
 C31 C36 1.412(3) . ?
 C32 H32 0.9500 . ?
 C32 C33 1.401(3) . ?
 C33 H33 0.9500 . ?
 C33 C34 1.397(4) . ?
 C34 H34 0.9500 . ?
 C34 C35 1.393(4) . ?
 C35 H35 0.9500 . ?
 C35 C36 1.402(3) . ?
 C37 H37 0.9500 . ?
 C38 C39 1.396(3) . ?
 C38 C43 1.398(3) . ?
 C39 H39 0.9500 . ?
 C39 C40 1.402(3) . ?
 C40 H40 0.9500 . ?
 C40 C41 1.393(3) . ?
 C41 C42 1.416(3) . ?
 C41 C44 1.511(3) . ?
 C42 H42 0.9500 . ?
 C42 C43 1.390(3) . ?
 C43 H43 0.9500 . ?
 C44 H44A 0.9800 . ?
 C44 H44B 0.9800 . ?
 C44 H44C 0.9800 . ?

loop_
  _geom_angle_atom_site_label_1
  _geom_angle_atom_site_label_2
  _geom_angle_atom_site_label_3
  _geom_angle
  _geom_angle_site_symmetry_1
  _geom_angle_site_symmetry_3
  _geom_angle_publ_flag
 O1 S1 O2 119.08(10) . . ?
 O1 S1 N1 108.02(10) . . ?
 O1 S1 C5 108.44(11) . . ?
 O2 S1 N1 105.21(11) . . ?
 O2 S1 C5 109.74(10) . . ?
 N1 S1 C5 105.50(10) . . ?
 O4 S2 O5 121.09(12) . . ?
 O4 S2 N4 107.17(12) . . ?
 O4 S2 C38 108.65(12) . . ?
 O5 S2 N4 104.41(11) . . ?
 O5 S2 C38 108.77(11) . . ?
 N4 S2 C38 105.67(11) . . ?
 C8 N1 S1 125.52(15) . . ?
 C8 N1 C15 107.92(15) . . ?
 C15 N1 S1 123.17(14) . . ?
 C20 N2 H2 116.4 . . ?
 C20 N2 C21 127.10(17) . . ?
 C21 N2 H2 116.4 . . ?
 C28 N3 C29 117.1(2) . . ?
 C36 N4 S2 125.12(16) . . ?
 C37 N4 S2 122.11(16) . . ?
 C37 N4 C36 107.88(18) . . ?
 H1A C1 H1B 109.5 . . ?
 H1A C1 H1C 109.5 . . ?
 H1B C1 H1C 109.5 . . ?
 C2 C1 H1A 109.5 . . ?
 C2 C1 H1B 109.5 . . ?
 C2 C1 H1C 109.5 . . ?
 C3 C2 C1 120.9(2) . . ?
 C7 C2 C1 120.4(3) . . ?
 C7 C2 C3 118.6(2) . . ?
 C2 C3 H3 119.5 . . ?
 C4 C3 C2 121.1(2) . . ?
 C4 C3 H3 119.5 . . ?
 C3 C4 H4 120.4 . . ?
 C3 C4 C5 119.2(3) . . ?
 C5 C4 H4 120.4 . . ?
 C4 C5 S1 118.0(2) . . ?
 C6 C5 S1 121.11(17) . . ?
 C6 C5 C4 120.8(2) . . ?
 C5 C6 H6 120.7 . . ?
 C5 C6 C7 118.6(2) . . ?
 C7 C6 H6 120.7 . . ?
 C2 C7 C6 121.6(2) . . ?
 C2 C7 H7 119.2 . . ?
 C6 C7 H7 119.2 . . ?
 C9 C8 N1 130.31(18) . . ?
 C9 C8 C13 122.97(19) . . ?
 C13 C8 N1 106.59(17) . . ?
 C8 C9 H9 121.8 . . ?
 C10 C9 C8 116.4(2) . . ?
 C10 C9 H9 121.8 . . ?
 C9 C10 H10 119.0 . . ?
 C9 C10 C11 122.1(2) . . ?
 C11 C10 H10 119.0 . . ?
 C10 C11 H11 119.5 . . ?
 C12 C11 C10 120.9(2) . . ?
 C12 C11 H11 119.5 . . ?
 C11 C12 H12 120.7 . . ?
 C11 C12 C13 118.6(2) . . ?
 C13 C12 H12 120.7 . . ?
 C8 C13 C14 108.38(18) . . ?
 C12 C13 C8 119.12(19) . . ?
 C12 C13 C14 132.47(19) . . ?
 C13 C14 C16 125.47(18) . . ?
 C15 C14 C13 107.28(18) . . ?
 C15 C14 C16 127.23(19) . . ?
 N1 C15 H15 125.1 . . ?
 C14 C15 N1 109.77(18) . . ?
 C14 C15 H15 125.1 . . ?
 C14 C16 H16 108.7 . . ?
 C14 C16 C17 120.05(17) . . ?
 C14 C16 C19 119.92(17) . . ?
 C17 C16 H16 108.7 . . ?
 C17 C16 C19 89.12(15) . . ?
 C19 C16 H16 108.7 . . ?
 C16 C17 H17A 114.0 . . ?
 C16 C17 H17B 114.0 . . ?
 C16 C17 C18 88.09(16) . . ?
 H17A C17 H17B 111.2 . . ?
 C18 C17 H17A 114.0 . . ?
 C18 C17 H17B 114.0 . . ?
 C17 C18 H18 108.6 . . ?
 C17 C18 C19 88.87(16) . . ?
 C19 C18 H18 108.6 . . ?
 C30 C18 C17 120.16(18) . . ?
 C30 C18 H18 108.6 . . ?
 C30 C18 C19 120.19(18) . . ?
 C16 C19 C18 86.36(16) . . ?
 C16 C19 H19 113.7 . . ?
 C18 C19 H19 113.7 . . ?
 C20 C19 C16 114.37(16) . . ?
 C20 C19 C18 112.29(16) . . ?
 C20 C19 H19 113.7 . . ?
 O3 C20 N2 123.32(19) . . ?
 O3 C20 C19 123.08(19) . . ?
 N2 C20 C19 113.58(17) . . ?
 N2 C21 C29 115.48(18) . . ?
 C22 C21 N2 124.3(2) . . ?
 C22 C21 C29 120.2(2) . . ?
 C21 C22 H22 120.2 . . ?
 C21 C22 C23 119.7(3) . . ?
 C23 C22 H22 120.2 . . ?
 C22 C23 H23 119.1 . . ?
 C24 C23 C22 121.9(2) . . ?
 C24 C23 H23 119.1 . . ?
 C23 C24 H24 120.2 . . ?
 C23 C24 C25 119.6(2) . . ?
 C25 C24 H24 120.2 . . ?
 C26 C25 C24 123.4(2) . . ?
 C26 C25 C29 117.2(2) . . ?
 C29 C25 C24 119.3(2) . . ?
 C25 C26 H26 120.2 . . ?
 C27 C26 C25 119.7(2) . . ?
 C27 C26 H26 120.2 . . ?
 C26 C27 H27 120.6 . . ?
 C26 C27 C28 118.7(2) . . ?
 C28 C27 H27 120.6 . . ?
 N3 C28 C27 124.3(2) . . ?
 N3 C28 H28 117.9 . . ?
 C27 C28 H28 117.9 . . ?
 N3 C29 C21 117.8(2) . . ?
 N3 C29 C25 122.9(2) . . ?
 C25 C29 C21 119.2(2) . . ?
 C31 C30 C18 126.07(19) . . ?
 C37 C30 C18 126.96(19) . . ?
 C37 C30 C31 106.97(19) . . ?
 C32 C31 C30 132.4(2) . . ?
 C32 C31 C36 119.4(2) . . ?
 C36 C31 C30 108.16(19) . . ?
 C31 C32 H32 120.7 . . ?
 C31 C32 C33 118.6(2) . . ?
 C33 C32 H32 120.7 . . ?
 C32 C33 H33 119.6 . . ?
 C34 C33 C32 120.9(2) . . ?
 C34 C33 H33 119.6 . . ?
 C33 C34 H34 119.1 . . ?
 C35 C34 C33 121.9(2) . . ?
 C35 C34 H34 119.1 . . ?
 C34 C35 H35 121.6 . . ?
 C34 C35 C36 116.7(2) . . ?
 C36 C35 H35 121.6 . . ?
 C31 C36 N4 106.82(18) . . ?
 C35 C36 N4 130.6(2) . . ?
 C35 C36 C31 122.5(2) . . ?
 N4 C37 H37 124.9 . . ?
 C30 C37 N4 110.12(19) . . ?
 C30 C37 H37 124.9 . . ?
 C39 C38 S2 119.82(18) . . ?
 C39 C38 C43 121.4(2) . . ?
 C43 C38 S2 118.77(17) . . ?
 C38 C39 H39 120.6 . . ?
 C38 C39 C40 118.8(2) . . ?
 C40 C39 H39 120.6 . . ?
 C39 C40 H40 119.6 . . ?
 C41 C40 C39 120.9(2) . . ?
 C41 C40 H40 119.6 . . ?
 C40 C41 C42 119.1(2) . . ?
 C40 C41 C44 121.1(2) . . ?
 C42 C41 C44 119.7(2) . . ?
 C41 C42 H42 119.7 . . ?
 C43 C42 C41 120.5(2) . . ?
 C43 C42 H42 119.7 . . ?
 C38 C43 H43 120.4 . . ?
 C42 C43 C38 119.2(2) . . ?
 C42 C43 H43 120.4 . . ?
 C41 C44 H44A 109.5 . . ?
 C41 C44 H44B 109.5 . . ?
 C41 C44 H44C 109.5 . . ?
 H44A C44 H44B 109.5 . . ?
 H44A C44 H44C 109.5 . . ?
 H44B C44 H44C 109.5 . . ?

_shelx_res_file
;
TITL Baran102 in P-1
CELL 0.71073 9.9688 15.3831 15.7737 110.732 108.3 100.249
ZERR 2 0.0078 0.0118 0.0146 0.014 0.01 0.01
LATT 1

SFAC C H N O S Cl
UNIT 90 76 8 10 4 4

L.S. 10
PLAN  10
SIZE 0.105 0.331 0.442
TEMP -173.15
rem using squeeze
rem Platon Squeeze found 72e/cel with void 236.6 A3
rem treated as two molecules of CH2CL2
rem added to formula to account for F000, density, moleuclar mass
bond $H
fmap 2
acta 50
REM <HKL>C:/Users/Curtis/Desktop/BARAN102/Copy%20of%20squeezed.hkl</HKL>

WGHT    0.103100    0.791200
FVAR       1.52571
S1    5    0.632688   -0.135971    0.313197    11.00000    0.02841    0.02951 =
         0.03241    0.01543    0.01577    0.01648
S2    5    0.799277    0.517725    0.314854    11.00000    0.04302    0.02606 =
         0.02304    0.01061    0.01285    0.00410
O1    4    0.590496   -0.228845    0.316504    11.00000    0.04398    0.03302 =
         0.04727    0.02292    0.02337    0.02231
O2    4    0.787984   -0.076099    0.362614    11.00000    0.02804    0.04282 =
         0.04164    0.01945    0.01602    0.01881
O3    4    0.432341    0.123570    0.250175    11.00000    0.03330    0.03456 =
         0.02755    0.01593    0.01625    0.01775
O4    4    0.743782    0.542118    0.233582    11.00000    0.06343    0.03895 =
         0.02587    0.01686    0.01211    0.00225
O5    4    0.898470    0.460090    0.316420    11.00000    0.04959    0.03178 =
         0.03697    0.01156    0.02476    0.01037
N1    3    0.544990   -0.066394    0.365576    11.00000    0.02228    0.02412 =
         0.02689    0.01205    0.01059    0.01092
N2    3    0.224477    0.172624    0.219449    11.00000    0.02553    0.03029 =
         0.01842    0.00598    0.00688    0.01007
AFIX  43
H2    2    0.169796    0.199656    0.247953    11.00000   -1.20000
AFIX   0
N3    3    0.029447    0.251162    0.139597    11.00000    0.02856    0.03225 =
         0.02765    0.01207    0.00756    0.00871
N4    3    0.652276    0.452706    0.319677    11.00000    0.03461    0.02440 =
         0.02604    0.01379    0.00727    0.00526
C1    1    0.407382   -0.208651   -0.120869    11.00000    0.07872    0.05707 =
         0.02954    0.01009    0.02276   -0.00296
AFIX 137
H1A   2    0.402952   -0.147267   -0.125484    11.00000   -1.50000
H1B   2    0.307300   -0.257734   -0.157848    11.00000   -1.50000
H1C   2    0.475326   -0.233067   -0.149145    11.00000   -1.50000
AFIX   0
C2    1    0.464425   -0.189754   -0.011879    11.00000    0.05248    0.04070 =
         0.03123    0.00861    0.02258    0.00127
C3    1    0.506105   -0.261105    0.017059    11.00000    0.07681    0.04277 =
         0.03960    0.00569    0.03456    0.01818
AFIX  43
H3    2    0.501265   -0.321068   -0.031641    11.00000   -1.20000
AFIX   0
C4    1    0.554193   -0.245202    0.115697    11.00000    0.07174    0.03809 =
         0.04417    0.01594    0.03418    0.02689
AFIX  43
H4    2    0.581936   -0.293856    0.134404    11.00000   -1.20000
AFIX   0
C5    1    0.561306   -0.156492    0.187334    11.00000    0.03361    0.03063 =
         0.02907    0.01056    0.01674    0.01127
C6    1    0.519374   -0.084747    0.160451    11.00000    0.03202    0.03127 =
         0.02883    0.01030    0.01494    0.00984
AFIX  43
H6    2    0.523769   -0.024868    0.209039    11.00000   -1.20000
AFIX   0
C7    1    0.470651   -0.103097    0.060135    11.00000    0.03950    0.03711 =
         0.02838    0.01246    0.01447    0.00495
AFIX  43
H7    2    0.441230   -0.055008    0.041105    11.00000   -1.20000
AFIX   0
C8    1    0.392040   -0.097989    0.348370    11.00000    0.02186    0.02922 =
         0.01959    0.01470    0.00769    0.01121
C9    1    0.293781   -0.192525    0.313173    11.00000    0.03032    0.02747 =
         0.02408    0.01433    0.00934    0.00879
AFIX  43
H9    2    0.322259   -0.249452    0.291321    11.00000   -1.20000
AFIX   0
C10   1    0.152137   -0.198519    0.311956    11.00000    0.02707    0.03673 =
         0.03514    0.02153    0.00964    0.00726
AFIX  43
H10   2    0.082353   -0.261300    0.288934    11.00000   -1.20000
AFIX   0
C11   1    0.109015   -0.114299    0.343836    11.00000    0.02494    0.04983 =
         0.04289    0.03063    0.01651    0.01638
AFIX  43
H11   2    0.011289   -0.121429    0.341853    11.00000   -1.20000
AFIX   0
C12   1    0.207689   -0.020840    0.378176    11.00000    0.02691    0.03615 =
         0.03492    0.02236    0.01680    0.01781
AFIX  43
H12   2    0.178088    0.035717    0.399188    11.00000   -1.20000
AFIX   0
C13   1    0.352321   -0.011958    0.381089    11.00000    0.02519    0.02992 =
         0.02218    0.01540    0.01006    0.01290
C14   1    0.481616    0.072750    0.415671    11.00000    0.02579    0.02608 =
         0.02191    0.01448    0.01030    0.01219
C15   1    0.594576    0.038401    0.404881    11.00000    0.02517    0.02605 =
         0.02245    0.01297    0.01022    0.00958
AFIX  43
H15   2    0.691902    0.078050    0.421025    11.00000   -1.20000
AFIX   0
C16   1    0.487311    0.178088    0.457466    11.00000    0.02833    0.02670 =
         0.02138    0.01331    0.01053    0.01150
AFIX  13
H16   2    0.470786    0.194244    0.519836    11.00000   -1.20000
AFIX   0
C17   1    0.625110    0.260690    0.477667    11.00000    0.02831    0.02588 =
         0.02483    0.01171    0.00687    0.01102
AFIX  23
H17A  2    0.675215    0.239474    0.432515    11.00000   -1.20000
H17B  2    0.698123    0.295349    0.547965    11.00000   -1.20000
AFIX   0
C18   1    0.516521    0.316585    0.447521    11.00000    0.02793    0.02164 =
         0.02280    0.00878    0.00793    0.00810
AFIX  13
H18   2    0.505567    0.359194    0.508008    11.00000   -1.20000
AFIX   0
C19   1    0.382992    0.215837    0.390235    11.00000    0.02472    0.02304 =
         0.02238    0.01120    0.00979    0.00966
AFIX  13
H19   2    0.291904    0.220888    0.403003    11.00000   -1.20000
AFIX   0
C20   1    0.351041    0.165172    0.280852    11.00000    0.02382    0.01950 =
         0.02452    0.01047    0.00952    0.00516
C21   1    0.173225    0.141633    0.115991    11.00000    0.02509    0.03414 =
         0.02059    0.00647    0.00614    0.00723
C22   1    0.214583    0.072826    0.054281    11.00000    0.03389    0.05478 =
         0.02342    0.00111    0.00301    0.01853
AFIX  43
H22   2    0.281428    0.042905    0.080902    11.00000   -1.20000
AFIX   0
C23   1    0.156965    0.047314   -0.048413    11.00000    0.04344    0.07623 =
         0.02223   -0.00311    0.00802    0.02449
AFIX  43
H23   2    0.186648    0.000396   -0.090067    11.00000   -1.20000
AFIX   0
C24   1    0.059038    0.088460   -0.089909    11.00000    0.04062    0.07104 =
         0.01973    0.00603    0.00879    0.01376
AFIX  43
H24   2    0.022925    0.070617   -0.159114    11.00000   -1.20000
AFIX   0
C25   1    0.012055    0.158084   -0.028376    11.00000    0.02820    0.05206 =
         0.02330    0.01208    0.00667    0.00649
C26   1   -0.088882    0.204222   -0.064882    11.00000    0.03314    0.06619 =
         0.02480    0.02302    0.00215    0.00945
AFIX  43
H26   2   -0.131028    0.187813   -0.133776    11.00000   -1.20000
AFIX   0
C27   1   -0.124931    0.272380   -0.000200    11.00000    0.03640    0.05906 =
         0.03810    0.02766    0.00410    0.01566
AFIX  43
H27   2   -0.190213    0.304930   -0.023231    11.00000   -1.20000
AFIX   0
C28   1   -0.063152    0.293348    0.101446    11.00000    0.03335    0.04407 =
         0.03701    0.01702    0.00828    0.01637
AFIX  43
H28   2   -0.089337    0.340601    0.145457    11.00000   -1.20000
AFIX   0
C29   1    0.069249    0.185018    0.075466    11.00000    0.02406    0.03149 =
         0.02025    0.00797    0.00585    0.00430
C30   1    0.545951    0.376421    0.394273    11.00000    0.02785    0.01775 =
         0.01898    0.00394    0.00311    0.00508
C31   1    0.450643    0.428924    0.357757    11.00000    0.02730    0.01977 =
         0.02083    0.00494   -0.00206    0.00361
C32   1    0.313888    0.437090    0.359098    11.00000    0.02939    0.02196 =
         0.03636    0.00895    0.00415    0.00605
AFIX  43
H32   2    0.266046    0.405409    0.388750    11.00000   -1.20000
AFIX   0
C33   1    0.248785    0.492977    0.315796    11.00000    0.03157    0.02532 =
         0.04952    0.01100   -0.00274    0.00861
AFIX  43
H33   2    0.155299    0.498613    0.315517    11.00000   -1.20000
AFIX   0
C34   1    0.319494    0.540537    0.273014    11.00000    0.04276    0.02497 =
         0.04647    0.01411   -0.00937    0.00775
AFIX  43
H34   2    0.272750    0.577935    0.244182    11.00000   -1.20000
AFIX   0
C35   1    0.456560    0.534662    0.271447    11.00000    0.04554    0.02483 =
         0.03510    0.01493   -0.00225    0.00312
AFIX  43
H35   2    0.504990    0.567815    0.243100    11.00000   -1.20000
AFIX   0
C36   1    0.519549    0.477404    0.313769    11.00000    0.03071    0.02094 =
         0.02594    0.00916   -0.00050    0.00296
C37   1    0.665327    0.392825    0.370961    11.00000    0.03098    0.02156 =
         0.02220    0.01039    0.00592    0.00714
AFIX  43
H37   2    0.745749    0.367923    0.386638    11.00000   -1.20000
AFIX   0
C38   1    0.881726    0.627344    0.427100    11.00000    0.03030    0.02583 =
         0.02350    0.01192    0.00991    0.00543
C39   1    0.893573    0.717986    0.424289    11.00000    0.02956    0.02945 =
         0.03080    0.01812    0.01410    0.01057
AFIX  43
H39   2    0.854039    0.721291    0.362732    11.00000   -1.20000
AFIX   0
C40   1    0.964820    0.804037    0.513885    11.00000    0.02786    0.02507 =
         0.03403    0.01336    0.01304    0.00929
AFIX  43
H40   2    0.974656    0.866160    0.512797    11.00000   -1.20000
AFIX   0
C41   1    1.021393    0.799692    0.604488    11.00000    0.02397    0.02681 =
         0.03239    0.00981    0.01314    0.00721
C42   1    1.004444    0.706732    0.605442    11.00000    0.03166    0.03133 =
         0.02403    0.01267    0.00902    0.00625
AFIX  43
H42   2    1.040349    0.703009    0.666994    11.00000   -1.20000
AFIX   0
C43   1    0.935723    0.620902    0.517085    11.00000    0.04045    0.02681 =
         0.02672    0.01516    0.01145    0.00657
AFIX  43
H43   2    0.925572    0.558624    0.517837    11.00000   -1.20000
AFIX   0
C44   1    1.097246    0.892163    0.701331    11.00000    0.03762    0.03176 =
         0.03099    0.00697    0.01382    0.00347
AFIX 137
H44A  2    1.101685    0.949752    0.687670    11.00000   -1.50000
H44B  2    1.198835    0.894394    0.737126    11.00000   -1.50000
H44C  2    1.040427    0.892330    0.742019    11.00000   -1.50000
AFIX   0
HKLF 4

REM  Baran102 in P-1
REM R1 =  0.0528 for    7111 Fo > 4sig(Fo)  and  0.0633 for all    8867 data
REM    498 parameters refined using      0 restraints

END

WGHT      0.0852      0.7387

REM Highest difference peak  0.372,  deepest hole -0.511,  1-sigma level  0.068
Q1    1   0.3672  0.1926  0.3358  11.00000  0.05    0.37
Q2    1   0.5712  0.6495  0.3145  11.00000  0.05    0.33
Q3    1   0.1250  0.1563  0.0949  11.00000  0.05    0.30
Q4    1   0.5367 -0.2127  0.0086  11.00000  0.05    0.30
Q5    1   0.2904  0.2992  0.3410  11.00000  0.05    0.30
Q6    1   0.4983  0.4024  0.3820  11.00000  0.05    0.29
Q7    1  -0.0181  0.5516  0.1178  11.00000  0.05    0.27
Q8    1   0.4577  0.0540  0.2271  11.00000  0.05    0.27
Q9    1   0.5883  0.2931  0.4646  11.00000  0.05    0.25
Q10   1   0.7015  0.7046  0.3903  11.00000  0.05    0.25
;
_shelx_res_checksum               78423
_shelx_hkl_file
;
   1   0  -1    2448     246                                                        4028    9.36    0.04  1.0000
   1   0  -1    2308     247                                                        3848    9.36    0.04  1.0000
   1   0  -1    2457     233                                                        4039    9.36    0.04  1.0000
  -1   0   1    2487     301                                                        4078    9.36   -0.04  1.0000
  -1   0   1    2198     212                                                        3706    9.36   -0.04  1.0000
  -1   0   1    2847     233                                                        4536    9.36   -0.04  1.0000
  -1   0   1    2326     270                                                        3871    9.36   -0.04  1.0000
   2   0  -2   45324    1844                                                       32277  -22.24   -0.16  1.0000
   2   0  -2   45844    1741                                                       32716  -22.24   -0.16  1.0000
   2   0  -2   44412    1838                                                       31508  -22.24   -0.16  1.0000
  -2   0   2   42330    1844                                                       29758  -22.24    0.16  1.0000
  -2   0   2   38404    2248                                                       26482  -22.24    0.16  1.0000
  -2   0   2   42546    2018                                                       29939  -22.24    0.16  1.0000
  -2   0   2   40569    1741                                                       28285  -22.24    0.16  1.0000
  -2   0   2   42668    1735                                                       30042  -22.24    0.16  1.0000
  -2   0   2   42961    1582                                                       30288  -22.24    0.16  1.0000
   3   0  -3    3983     320                                                        5342   -6.67    0.13  1.0000
   3   0  -3    3856     321                                                        5195   -6.67    0.13  1.0000
   3   0  -3    3905     304                                                        5251   -6.67    0.13  1.0000
  -3   0   3    3858     276                                                        5197   -6.67   -0.13  1.0000
  -3   0   3    3699     392                                                        5012   -6.67   -0.13  1.0000
  -3   0   3    4187     352                                                        5578   -6.67   -0.13  1.0000
  -3   0   3    4311     352                                                        5720   -6.67   -0.13  1.0000
  -3   0   3    3670     321                                                        4978   -6.67   -0.13  1.0000
  -3   0   3    3969     302                                                        5325   -6.67   -0.13  1.0000
  -3   0   3    3115     303                                                        4328   -6.67   -0.13  1.0000
   4   0  -4    1872      87                                                        1370   -4.19   -0.05  1.0000
   4   0  -4    1767      82                                                        1280   -4.19   -0.05  1.0000
  -4   0   4    1953     107                                                        1439   -4.19    0.05  1.0000
  -4   0   4    1681      86                                                        1207   -4.19    0.05  1.0000
  -4   0   4    1985      97                                                        1467   -4.19    0.05  1.0000
  -4   0   4    1707      83                                                        1229   -4.19    0.05  1.0000
  -4   0   4    1682      74                                                        1208   -4.19    0.05  1.0000
  -4   0   4    1896      83                                                        1390   -4.19    0.05  1.0000
  -4   0   4    1967      96                                                        1451   -4.19    0.05  1.0000
   5   0  -5    2158     125                                                        1984   -1.28    0.11  1.0000
   5   0  -5    2036     118                                                        1867   -1.28    0.11  1.0000
  -5   0   5    2158     137                                                        1984   -1.28   -0.11  1.0000
  -5   0   5    2156     124                                                        1982   -1.28   -0.11  1.0000
  -5   0   5    2134     107                                                        1961   -1.28   -0.11  1.0000
  -5   0   5    1971     137                                                        1805   -1.28   -0.11  1.0000
  -5   0   5    2145     153                                                        1971   -1.28   -0.11  1.0000
  -5   0   5    2208     118                                                        2032   -1.28   -0.11  1.0000
  -5   0   5    1911     118                                                        1747   -1.28   -0.11  1.0000
   6   0  -6    4310     302                                                        5173    4.20    0.33  1.0000
   6   0  -6    4572     319                                                        5459    4.20    0.33  1.0000
  -6   0   6    4348     302                                                        5214    4.20   -0.33  1.0000
  -6   0   6    3637     302                                                        4433    4.20   -0.33  1.0000
  -6   0   6    4486     391                                                        5365    4.20   -0.33  1.0000
  -6   0   6    4095     350                                                        4937    4.20   -0.33  1.0000
  -7   0   7     225      26                                                         294    1.43   -0.05  1.0000
  -7   0   7     203      26                                                         269    1.43   -0.05  1.0000
  -7   0   7     230      34                                                         300    1.43   -0.05  1.0000
   8   0  -8    1059      64                                                         856    2.19   -0.12  1.0000
  -8   0   8    1077      61                                                         873    2.19    0.12  1.0000
  -8   0   8    1059      79                                                         856    2.19    0.12  1.0000
  -8   0   8    1069      61                                                         865    2.19    0.12  1.0000
  -9   0   9     360      32                                                         331    0.52    0.01  1.0000
  -9   0   9     375      32                                                         345    0.52    0.01  1.0000
  10   0 -10      12       8                                                          -5   -2.35    0.07  1.0000
 -10   0  10      12      10                                                          -3   -2.35   -0.07  1.0000
 -10   0  10      33      10                                                           5   -2.35   -0.07  1.0000
  11   0 -11     135      30                                                         194   -1.54    0.19  1.0000
 -11   0  11      99      28                                                         150   -1.54   -0.19  1.0000
 -11   0  11     153      28                                                         216   -1.54   -0.19  1.0000
 -11   0  11     179      29                                                         246   -1.54   -0.19  1.0000
  12   0 -12     187      32                                                         172   -0.38    0.38  1.0000
 -12   0  12     204      29                                                         188   -0.38   -0.38  1.0000
 -12   0  12     241      30                                                         224   -0.38   -0.38  1.0000
 -12  -1  12      42      19                                                          54    0.54    0.39  1.0000
 -12  -1  12      45      19                                                          57    0.54    0.39  1.0000
 -11  -1  11     191      33                                                         266    1.67    0.04  1.0000
 -11  -1  11     265      35                                                         352    1.67    0.04  1.0000
 -11  -1  11     269      41                                                         357    1.67    0.04  1.0000
  11   1 -11     234      37                                                         317    1.67   -0.04  1.0000
 -10  -1  10      24      16                                                          56    1.71    0.03  1.0000
 -10  -1  10      44      17                                                          85    1.71    0.03  1.0000
  10   1 -10      41      16                                                          80    1.71   -0.03  1.0000
  -9  -1   9      20      13                                                          47   -1.60   -0.07  1.0000
  -9  -1   9      27      14                                                          58   -1.60   -0.07  1.0000
  -8  -1   8     812      68                                                        1014   -2.24   -0.12  1.0000
  -8  -1   8     721      86                                                         912   -2.24   -0.12  1.0000
  -8  -1   8     808      68                                                        1010   -2.24   -0.12  1.0000
  -7  -1   7     143      20                                                         115   -0.84    0.10  1.0000
  -7  -1   7     148      16                                                         119   -0.84    0.10  1.0000
  -7  -1   7     105      14                                                          81   -0.84    0.10  1.0000
  -6  -1   6     614      63                                                         978   -4.34    0.22  1.0000
  -6  -1   6     653      64                                                        1027   -4.34    0.22  1.0000
  -6  -1   6     589      81                                                         946   -4.34    0.22  1.0000
  -6  -1   6     621      73                                                         987   -4.34    0.22  1.0000
   6   1  -6     527      66                                                         867   -4.34   -0.22  1.0000
  -5  -1   5   10647     658                                                       11216    1.82    0.11  1.0000
  -5  -1   5   10784     597                                                       11357    1.82    0.11  1.0000
  -5  -1   5   11208     763                                                       11792    1.82    0.11  1.0000
  -5  -1   5   11612     764                                                       12206    1.82    0.11  1.0000
  -5  -1   5   11090     656                                                       11671    1.82    0.11  1.0000
  -5  -1   5   10169     849                                                       10725    1.82    0.11  1.0000
   5   1  -5   10575     658                                                       11142    1.82   -0.11  1.0000
   5   1  -5    9809     694                                                       10355    1.82   -0.11  1.0000
  -4  -1   4    3708     149                                                        2522    7.14    0.03  1.0000
  -4  -1   4    3589     135                                                        2424    7.14    0.03  1.0000
  -4  -1   4    3631     149                                                        2459    7.14    0.03  1.0000
  -4  -1   4    3642     192                                                        2468    7.14    0.03  1.0000
  -4  -1   4    3962     174                                                        2732    7.14    0.03  1.0000
  -4  -1   4    3671     173                                                        2492    7.14    0.03  1.0000
   4   1  -4    3611     157                                                        2442    7.14   -0.03  1.0000
   4   1  -4    3624     149                                                        2453    7.14   -0.03  1.0000
  -3  -1   3   19505    1429                                                       23236    8.55    0.10  1.0000
  -3  -1   3   17826    1232                                                       21400    8.55    0.10  1.0000
  -3  -1   3   17194    1428                                                       20707    8.55    0.10  1.0000
  -3  -1   3   16881    1119                                                       20363    8.55    0.10  1.0000
  -3  -1   3   16638    1591                                                       20097    8.55    0.10  1.0000
  -3  -1   3   17868    1228                                                       21446    8.55    0.10  1.0000
   3   1  -3   18379    1301                                                       22006    8.55   -0.10  1.0000
   3   1  -3   17666    1232                                                       21225    8.55   -0.10  1.0000
  -2  -1   2   58033    3223                                                       49379   12.50   -0.10  1.0000
  -2  -1   2   61441    2772                                                       52526   12.50   -0.10  1.0000
  -2  -1   2   52249    2780                                                       44055   12.50   -0.10  1.0000
  -2  -1   2   56978    3223                                                       48406   12.50   -0.10  1.0000
   2   1  -2   54582    2934                                                       46200   12.50    0.10  1.0000
  -1  -1   1   24227     841                                                       14254  -24.26    0.06  1.0000
  -1  -1   1   25674     845                                                       15369  -24.26    0.06  1.0000
  -1  -1   1   23919    1093                                                       14018  -24.26    0.06  1.0000
  -1  -1   1   25212     982                                                       15012  -24.26    0.06  1.0000
  -1  -1   1   26038     982                                                       15651  -24.26    0.06  1.0000
   1   1  -1   22844     891                                                       13198  -24.26   -0.06  1.0000
   0  -1   0   11454       4                                                          39  -67.43    0.04  1.0000
   0  -1   0   11437       4                                                          38  -67.43    0.04  1.0000
   0   1   0   11601       4                                                          48  -67.43   -0.04  1.0000
   0   1   0   11538       4                                                          44  -67.43   -0.04  1.0000
   1  -1  -1    1883     202                                                        2998    7.60    0.08  1.0000
   1  -1  -1    1939     175                                                        3069    7.60    0.08  1.0000
   1  -1  -1    2096     185                                                        3266    7.60    0.08  1.0000
  -1   1   1    1840     185                                                        2944    7.60   -0.08  1.0000
  -1   1   1    1995     174                                                        3139    7.60   -0.08  1.0000
  -1   1   1    1493     158                                                        2501    7.60   -0.08  1.0000
   2  -1  -2   12522    1237                                                       21937   24.22    0.12  1.0000
   2  -1  -2   12388    1306                                                       21760   24.22    0.12  1.0000
   2  -1  -2   12550    1310                                                       21974   24.22    0.12  1.0000
  -2   1   2   11919    1124                                                       21137   24.22   -0.12  1.0000
  -2   1   2   14597    1233                                                       24658   24.22   -0.12  1.0000
  -2   1   2   11850    1434                                                       21044   24.22   -0.12  1.0000
  -2   1   2   11450    1237                                                       20511   24.22   -0.12  1.0000
  -2   1   2   10205    1309                                                       18832   24.22   -0.12  1.0000
  -2   1   2   11595    1597                                                       20704   24.22   -0.12  1.0000
   3  -1  -3     527      26                                                         320    3.39   -0.16  1.0000
   3  -1  -3     565      27                                                         350    3.39   -0.16  1.0000
   3  -1  -3     699      28                                                         457    3.39   -0.16  1.0000
  -3   1   3     566      24                                                         351    3.39    0.16  1.0000
  -3   1   3     589      27                                                         369    3.39    0.16  1.0000
  -3   1   3     506      33                                                         304    3.39    0.16  1.0000
  -3   1   3     646      27                                                         414    3.39    0.16  1.0000
   4  -1  -4     250      33                                                         399    2.79    0.14  1.0000
   4  -1  -4     342      34                                                         514    2.79    0.14  1.0000
  -4   1   4     286      37                                                         445    2.79   -0.14  1.0000
  -4   1   4     298      29                                                         460    2.79   -0.14  1.0000
  -4   1   4     328      42                                                         497    2.79   -0.14  1.0000
  -4   1   4     259      32                                                         411    2.79   -0.14  1.0000
  -4   1   4     264      33                                                         417    2.79   -0.14  1.0000
   5  -1  -5    3417     218                                                        3637    1.24   -0.12  1.0000
   5  -1  -5    3101     217                                                        3311    1.24   -0.12  1.0000
   5  -1  -5    3207     207                                                        3420    1.24   -0.12  1.0000
  -5   1   5    3465     208                                                        3686    1.24    0.12  1.0000
  -5   1   5    2879     266                                                        3081    1.24    0.12  1.0000
  -5   1   5    3313     218                                                        3530    1.24    0.12  1.0000
  -5   1   5    3530     206                                                        3753    1.24    0.12  1.0000
  -5   1   5    3278     187                                                        3493    1.24    0.12  1.0000
  -5   1   5    2939     239                                                        3143    1.24    0.12  1.0000
   6  -1  -6    3436     169                                                        2694   -4.50   -0.29  1.0000
   6  -1  -6    3825     179                                                        3039   -4.50   -0.29  1.0000
  -6   1   6    3476     196                                                        2729   -4.50    0.29  1.0000
  -6   1   6    3512     170                                                        2761   -4.50    0.29  1.0000
  -6   1   6    3424     218                                                        2683   -4.50    0.29  1.0000
  -6   1   6    3523     169                                                        2771   -4.50    0.29  1.0000
   7  -1  -7     781      48                                                         603   -2.26   -0.02  1.0000
  -7   1   7     797      59                                                         617   -2.26    0.02  1.0000
  -7   1   7     843      47                                                         658   -2.26    0.02  1.0000
  -7   1   7     781      46                                                         603   -2.26    0.02  1.0000
  -8   1   8     311      37                                                         412   -1.78   -0.03  1.0000
  -8   1   8     366      38                                                         475   -1.78   -0.03  1.0000
  -9   1   9      59      17                                                          77    0.74    0.04  1.0000
  -9   1   9      55      15                                                          73    0.74    0.04  1.0000
  10  -1 -10     345      27                                                         209    2.75   -0.16  1.0000
 -10   1  10     374      27                                                         232    2.75    0.16  1.0000
 -10   1  10     391      28                                                         245    2.75    0.16  1.0000
  11  -1 -11     113      20                                                          80    1.12   -0.25  1.0000
 -11   1  11      96      18                                                          66    1.12    0.25  1.0000
 -11   1  11      81      19                                                          54    1.12    0.25  1.0000
 -11   1  11      68      17                                                          43    1.12    0.25  1.0000
 -12   1  12      14      15                                                          17    0.07    0.27  1.0000
 -12   1  12       0      13                                                          -6    0.07    0.27  1.0000
 -12   1  12      11      15                                                          14    0.07    0.27  1.0000
 -12  -2  12       5      14                                                           7   -0.55   -0.29  1.0000
 -12  -2  12      14      14                                                          17   -0.55   -0.29  1.0000
 -11  -2  11      35      18                                                          67   -1.50    0.03  1.0000
 -11  -2  11      28      19                                                          57   -1.50    0.03  1.0000
 -11  -2  11      24      17                                                          51   -1.50    0.03  1.0000
  11   2 -11       9      15                                                          28   -1.50   -0.03  1.0000
 -10  -2  10     325      33                                                         275   -0.97   -0.08  1.0000
 -10  -2  10     334      29                                                         283   -0.97   -0.08  1.0000
 -10  -2  10     349      31                                                         297   -0.97   -0.08  1.0000
  10   2 -10     383      32                                                         328   -0.97    0.08  1.0000
  -9  -2   9    1160      65                                                         924    2.44    0.22  1.0000
  -9  -2   9    1129      64                                                         897    2.44    0.22  1.0000
  -8  -2   8    1148      66                                                         945    2.10    0.08  1.0000
  -8  -2   8    1198      66                                                         990    2.10    0.08  1.0000
  -7  -2   7    3272     189                                                        3208    0.38   -0.15  1.0000
  -7  -2   7    3280     190                                                        3216    0.38   -0.15  1.0000
  -7  -2   7    3043     244                                                        2981    0.38   -0.15  1.0000
  -6  -2   6     356      19                                                         150    4.43   -0.06  1.0000
  -6  -2   6     397      18                                                         177    4.43   -0.06  1.0000
  -6  -2   6     319      20                                                         126    4.43   -0.06  1.0000
  -6  -2   6     400      18                                                         179    4.43   -0.06  1.0000
   6   2  -6     379      18                                                         165    4.43    0.06  1.0000
  -5  -2   5     939      78                                                        1277   -3.41   -0.11  1.0000
  -5  -2   5    1166     103                                                        1540   -3.41   -0.11  1.0000
  -5  -2   5    1146     102                                                        1517   -3.41   -0.11  1.0000
  -5  -2   5    1059     113                                                        1417   -3.41   -0.11  1.0000
  -5  -2   5    1063      88                                                        1421   -3.41   -0.11  1.0000
  -5  -2   5    1057      88                                                        1414   -3.41   -0.11  1.0000
   5   2  -5     958      92                                                        1300   -3.41    0.11  1.0000
   5   2  -5    1059      88                                                        1417   -3.41    0.11  1.0000
  -4  -2   4    1364      36                                                         446  -10.58   -0.12  1.0000
  -4  -2   4    1409      32                                                         472  -10.58   -0.12  1.0000
  -4  -2   4    1436      40                                                         488  -10.58   -0.12  1.0000
  -4  -2   4    1416      37                                                         476  -10.58   -0.12  1.0000
  -4  -2   4    1372      32                                                         451  -10.58   -0.12  1.0000
   4   2  -4    1255      32                                                         385  -10.58    0.12  1.0000
  -3  -2   3    2596     231                                                        3629   -6.22   -0.06  1.0000
  -3  -2   3    2344     199                                                        3330   -6.22   -0.06  1.0000
  -3  -2   3    2205     230                                                        3164   -6.22   -0.06  1.0000
  -3  -2   3    2538     200                                                        3561   -6.22   -0.06  1.0000
  -3  -2   3    2470     257                                                        3480   -6.22   -0.06  1.0000
   3   2  -3    2252     210                                                        3220   -6.22    0.06  1.0000
  -2  -2   2   53225    3408                                                       52769    0.66    0.16  1.0000
  -2  -2   2   53717    3798                                                       53259    0.66    0.16  1.0000
  -2  -2   2   54050    2940                                                       53590    0.66    0.16  1.0000
  -2  -2   2   52337    3408                                                       51885    0.66    0.16  1.0000
  -2  -2   2   51338    2930                                                       50890    0.66    0.16  1.0000
   2   2  -2   43315    3100                                                       42904    0.66   -0.16  1.0000
  -1  -2   1     154      59                                                         984   29.29   -0.22  1.0000
  -1  -2   1     140      76                                                        1020   29.29   -0.22  1.0000
  -1  -2   1     146      68                                                        1004   29.29   -0.22  1.0000
  -1  -2   1     155      59                                                         981   29.29   -0.22  1.0000
  -1  -2   1     141      68                                                        1017   29.29   -0.22  1.0000
   1   2  -1     195      62                                                         889   29.29    0.22  1.0000
   0  -2   0     231     204                                                        3311   48.66   -0.33  1.0000
   0  -2   0     229     192                                                        3318   48.66   -0.33  1.0000
   0  -2   0     192     193                                                        3469   48.66   -0.33  1.0000
   0   2   0     210     192                                                        3394   48.66    0.33  1.0000
   0   2   0     279     175                                                        3141   48.66    0.33  1.0000
   0   2   0     261     193                                                        3202   48.66    0.33  1.0000
   1  -2  -1    1575     247                                                        4548  -18.57    0.02  1.0000
   1  -2  -1    1495     286                                                        4411  -18.57    0.02  1.0000
   1  -2  -1    1151     259                                                        3804  -18.57    0.02  1.0000
   1  -2  -1    1299     260                                                        4069  -18.57    0.02  1.0000
  -1   2   1    1468     262                                                        4365  -18.57   -0.02  1.0000
  -1   2   1    1256     246                                                        3993  -18.57   -0.02  1.0000
  -1   2   1    1442     246                                                        4319  -18.57   -0.02  1.0000
   2  -2  -2    5523     119                                                        1876  -20.74    0.07  1.0000
   2  -2  -2    5726     132                                                        1995  -20.74    0.07  1.0000
   2  -2  -2    5634     114                                                        1941  -20.74    0.07  1.0000
   2  -2  -2    5943     120                                                        2124  -20.74    0.07  1.0000
  -2   2   2    5331     120                                                        1765  -20.74   -0.07  1.0000
  -2   2   2    5409     146                                                        1810  -20.74   -0.07  1.0000
  -2   2   2    5335     113                                                        1767  -20.74   -0.07  1.0000
  -2   2   2    5722     104                                                        1993  -20.74   -0.07  1.0000
  -2   2   2    5295     114                                                        1744  -20.74   -0.07  1.0000
   3  -2  -3    1936     129                                                        2058   -0.91    0.06  1.0000
   3  -2  -3    2050     150                                                        2175   -0.91    0.06  1.0000
   3  -2  -3    2045     137                                                        2170   -0.91    0.06  1.0000
   3  -2  -3    2014     136                                                        2138   -0.91    0.06  1.0000
  -3   2   3    2370     168                                                        2505   -0.91   -0.06  1.0000
  -3   2   3    2052     118                                                        2178   -0.91   -0.06  1.0000
  -3   2   3    1990     137                                                        2114   -0.91   -0.06  1.0000
  -3   2   3    1606     128                                                        1717   -0.91   -0.06  1.0000
  -3   2   3    2145     150                                                        2273   -0.91   -0.06  1.0000
   4  -2  -4    2890     190                                                        3283   -2.37   -0.12  1.0000
   4  -2  -4    3019     200                                                        3420   -2.37   -0.12  1.0000
   4  -2  -4    2556     198                                                        2926   -2.37   -0.12  1.0000
  -4   2   4    2698     244                                                        3078   -2.37    0.12  1.0000
  -4   2   4    2990     200                                                        3390   -2.37    0.12  1.0000
  -4   2   4    2414     218                                                        2774   -2.37    0.12  1.0000
  -4   2   4    2842     172                                                        3232   -2.37    0.12  1.0000
   5  -2  -5    3004     168                                                        2850   -0.95    0.08  1.0000
   5  -2  -5    3176     168                                                        3018   -0.95    0.08  1.0000
   5  -2  -5    2835     159                                                        2685   -0.95    0.08  1.0000
  -5   2   5    2742     144                                                        2595   -0.95   -0.08  1.0000
  -5   2   5    3062     184                                                        2906   -0.95   -0.08  1.0000
  -5   2   5    2757     167                                                        2609   -0.95   -0.08  1.0000
  -5   2   5    2408     203                                                        2270   -0.95   -0.08  1.0000
  -5   2   5    2331     158                                                        2196   -0.95   -0.08  1.0000
  -5   2   5    2480     157                                                        2340   -0.95   -0.08  1.0000
   6  -2  -6    1409     147                                                        2100    5.55    0.06  1.0000
   6  -2  -6    1681     142                                                        2430    5.55    0.06  1.0000
   6  -2  -6    1531     148                                                        2248    5.55    0.06  1.0000
  -6   2   6    1555     127                                                        2277    5.55   -0.06  1.0000
  -6   2   6    1530     140                                                        2247    5.55   -0.06  1.0000
  -6   2   6    1542     181                                                        2262    5.55   -0.06  1.0000
  -6   2   6    1666     142                                                        2412    5.55   -0.06  1.0000
  -6   2   6    1453     162                                                        2154    5.55   -0.06  1.0000
   7  -2  -7    1382      77                                                        1087    2.82    0.17  1.0000
  -7   2   7    1358      74                                                        1066    2.82   -0.17  1.0000
  -7   2   7    1381      95                                                        1086    2.82   -0.17  1.0000
  -7   2   7    1346      73                                                        1055    2.82   -0.17  1.0000
   8  -2  -8     377      30                                                         335    0.75    0.17  1.0000
  -8   2   8     276      27                                                         240    0.75   -0.17  1.0000
  -8   2   8     251      26                                                         217    0.75   -0.17  1.0000
  -9   2   9      11      13                                                          40   -1.97   -0.04  1.0000
  -9   2   9       8      13                                                          34   -1.97   -0.04  1.0000
  10  -2 -10      64      23                                                         150   -2.82    0.17  1.0000
 -10   2  10      72      23                                                         161   -2.82   -0.17  1.0000
 -10   2  10      72      23                                                         162   -2.82   -0.17  1.0000
  11  -2 -11     100      24                                                         114   -0.45    0.20  1.0000
 -11   2  11      87      23                                                         100   -0.45   -0.20  1.0000
 -11   2  11     124      25                                                         139   -0.45   -0.20  1.0000
 -12   2  12      42      16                                                          47    0.27   -0.13  1.0000
 -12   2  12      41      19                                                          46    0.27   -0.13  1.0000
 -11  -3  11      61      22                                                          91    1.15   -0.01  1.0000
 -11  -3  11      66      19                                                          97    1.15   -0.01  1.0000
 -11  -3  11      54      22                                                          82    1.15   -0.01  1.0000
  11   3 -11      53      21                                                          81    1.15    0.01  1.0000
 -10  -3  10      10       9                                                          13    0.26    0.06  1.0000
 -10  -3  10      17      10                                                          20    0.26    0.06  1.0000
 -10  -3  10       0       8                                                          -2    0.26    0.06  1.0000
  -9  -3   9      88      25                                                         192   -3.00   -0.38  1.0000
  -9  -3   9     106      24                                                         219   -3.00   -0.38  1.0000
  -9  -3   9      99      23                                                         208   -3.00   -0.38  1.0000
  -8  -3   8      47       9                                                          20   -1.61    0.06  1.0000
  -8  -3   8      59      10                                                          28   -1.61    0.06  1.0000
  -8  -3   8      31       8                                                          10   -1.61    0.06  1.0000
  -7  -3   7     419      34                                                         427    0.13    0.13  1.0000
  -7  -3   7     439      34                                                         447    0.13    0.13  1.0000
  -7  -3   7     403      38                                                         411    0.13    0.13  1.0000
  -7  -3   7     421      44                                                         429    0.13    0.13  1.0000
  -6  -3   6     175      29                                                         375   -4.10   -0.10  1.0000
  -6  -3   6     196      30                                                         405   -4.10   -0.10  1.0000
  -6  -3   6     166      33                                                         361   -4.10   -0.10  1.0000
  -6  -3   6     136      35                                                         317   -4.10   -0.10  1.0000
   6   3  -6     168      30                                                         364   -4.10    0.10  1.0000
  -5  -3   5     194      36                                                         510    5.78    0.15  1.0000
  -5  -3   5     205      46                                                         527    5.78    0.15  1.0000
  -5  -3   5     216      37                                                         545    5.78    0.15  1.0000
  -5  -3   5     202      42                                                         523    5.78    0.15  1.0000
  -5  -3   5     217      43                                                         547    5.78    0.15  1.0000
   5   3  -5     159      37                                                         452    5.78   -0.15  1.0000
  -4  -3   4    6291     247                                                        3728   12.21    0.13  1.0000
  -4  -3   4    6082     212                                                        3568   12.21    0.13  1.0000
  -4  -3   4    5933     274                                                        3454   12.21    0.13  1.0000
  -4  -3   4    6477     248                                                        3872   12.21    0.13  1.0000
  -4  -3   4    6154     213                                                        3623   12.21    0.13  1.0000
   4   3  -4    5887     224                                                        3419   12.21   -0.13  1.0000
  -3  -3   3    1105      73                                                        1066    0.40   -0.09  1.0000
  -3  -3   3     992      81                                                         955    0.40   -0.09  1.0000
  -3  -3   3    1066      63                                                        1027    0.40   -0.09  1.0000
  -3  -3   3    1098      63                                                        1059    0.40   -0.09  1.0000
  -3  -3   3    1093      73                                                        1054    0.40   -0.09  1.0000
   3   3  -3    1055      67                                                        1017    0.40    0.09  1.0000
  -2  -3   2   52537    4100                                                       59942  -10.45   -0.15  1.0000
  -2  -3   2   50442    3537                                                       57703  -10.45   -0.15  1.0000
  -2  -3   2   58206    3526                                                       65988  -10.45   -0.15  1.0000
  -2  -3   2   56208    4100                                                       63859  -10.45   -0.15  1.0000
   2   3  -2   51352    3733                                                       58676  -10.45    0.15  1.0000
  -1  -3   1    5594     846                                                       12702  -25.36    0.66  1.0000
  -1  -3   1    5658     943                                                       12798  -25.36    0.66  1.0000
  -1  -3   1    5378     730                                                       12375  -25.36    0.66  1.0000
  -1  -3   1    5413     728                                                       12429  -25.36    0.66  1.0000
  -1  -3   1    6045     846                                                       13377  -25.36    0.66  1.0000
   1   3  -1    5115     771                                                       11975  -25.36   -0.66  1.0000
   0  -3   0   59714    4515                                                       83264  -29.56    0.43  1.0000
   0  -3   0   45869    5249                                                       66751  -29.56    0.43  1.0000
   0  -3   0   59159    4796                                                       82609  -29.56    0.43  1.0000
   0   3   0   55235    4116                                                       77959  -29.56   -0.43  1.0000
   0   3   0   55811    4531                                                       78644  -29.56   -0.43  1.0000
   0   3   0   57812    4512                                                       81015  -29.56   -0.43  1.0000
   1  -3  -1    2722     642                                                        7392   22.62   -0.42  1.0000
   1  -3  -1    3345     576                                                        8398   22.62   -0.42  1.0000
   1  -3  -1    3381     497                                                        8455   22.62   -0.42  1.0000
   1  -3  -1    3915     526                                                        9289   22.62   -0.42  1.0000
   1  -3  -1    3264     524                                                        8270   22.62   -0.42  1.0000
  -1   3   1    2944     497                                                        7755   22.62    0.42  1.0000
  -1   3   1    3878     576                                                        9231   22.62    0.42  1.0000
  -1   3   1    3379     527                                                        8453   22.62    0.42  1.0000
  -1   3   1    3830     496                                                        9158   22.62    0.42  1.0000
  -1   3   1    3746     452                                                        9028   22.62    0.42  1.0000
   2  -3  -2     700       6                                                          10   15.59   -0.10  1.0000
   2  -3  -2     691       6                                                           9   15.59   -0.10  1.0000
   2  -3  -2     744       6                                                          16   15.59   -0.10  1.0000
   2  -3  -2     662       4                                                           6   15.59   -0.10  1.0000
  -2   3   2     730       6                                                          14   15.59    0.10  1.0000
  -2   3   2     758       6                                                          18   15.59    0.10  1.0000
  -2   3   2     708       6                                                          11   15.59    0.10  1.0000
  -2   3   2     673       5                                                           7   15.59    0.10  1.0000
  -2   3   2     730       8                                                          14   15.59    0.10  1.0000
   3  -3  -3   12281     836                                                       12498   -0.65    0.06  1.0000
   3  -3  -3   13971     839                                                       14202   -0.65    0.06  1.0000
   3  -3  -3   13451     919                                                       13678   -0.65    0.06  1.0000
   3  -3  -3   14519     794                                                       14755   -0.65    0.06  1.0000
  -3   3   3   15429     920                                                       15672   -0.65   -0.06  1.0000
  -3   3   3   13301     721                                                       13526   -0.65   -0.06  1.0000
  -3   3   3   12814     840                                                       13035   -0.65   -0.06  1.0000
  -3   3   3   13646     791                                                       13874   -0.65   -0.06  1.0000
  -3   3   3   11312    1022                                                       11520   -0.65   -0.06  1.0000
  -3   3   3   13513     794                                                       13740   -0.65   -0.06  1.0000
   4  -3  -4    4962     274                                                        4506    2.22    0.01  1.0000
   4  -3  -4    5459     290                                                        4980    2.22    0.01  1.0000
   4  -3  -4    5096     289                                                        4634    2.22    0.01  1.0000
   4  -3  -4    5434     318                                                        4956    2.22    0.01  1.0000
  -4   3   4    4976     275                                                        4519    2.22   -0.01  1.0000
  -4   3   4    5193     290                                                        4726    2.22   -0.01  1.0000
  -4   3   4    5068     274                                                        4607    2.22   -0.01  1.0000
  -4   3   4    4385     316                                                        3957    2.22   -0.01  1.0000
  -4   3   4    4986     353                                                        4529    2.22   -0.01  1.0000
  -4   3   4    5249     250                                                        4780    2.22   -0.01  1.0000
   5  -3  -5       0       5                                                          -2   -0.25    0.12  1.0000
   5  -3  -5      14       8                                                          11   -0.25    0.12  1.0000
   5  -3  -5       0       4                                                          -3   -0.25    0.12  1.0000
  -5   3   5       0       7                                                          -4   -0.25   -0.12  1.0000
  -5   3   5       9       7                                                           7   -0.25   -0.12  1.0000
  -5   3   5       8       8                                                           6   -0.25   -0.12  1.0000
  -5   3   5       0       6                                                           0   -0.25   -0.12  1.0000
  -5   3   5       9       6                                                           7   -0.25   -0.12  1.0000
  -5   3   5       7       7                                                           5   -0.25   -0.12  1.0000
   6  -3  -6    3197     262                                                        4442   -6.76    0.06  1.0000
   6  -3  -6    2703     274                                                        3856   -6.76    0.06  1.0000
   6  -3  -6    3231     276                                                        4483   -6.76    0.06  1.0000
  -6   3   6    3361     303                                                        4636   -6.76   -0.06  1.0000
  -6   3   6    2844     336                                                        4024   -6.76   -0.06  1.0000
  -6   3   6    3013     262                                                        4225   -6.76   -0.06  1.0000
  -6   3   6    3358     261                                                        4632   -6.76   -0.06  1.0000
  -6   3   6    3212     237                                                        4460   -6.76   -0.06  1.0000
   7  -3  -7      67       9                                                          23   -2.34   -0.47  1.0000
   7  -3  -7      47      10                                                          12   -2.34   -0.47  1.0000
  -7   3   7      57       9                                                          17   -2.34    0.47  1.0000
  -7   3   7      79      10                                                          30   -2.34    0.47  1.0000
  -7   3   7      67      10                                                          23   -2.34    0.47  1.0000
   8  -3  -8     182      21                                                         155    0.71   -0.23  1.0000
  -8   3   8     166      21                                                         140    0.71    0.23  1.0000
  -8   3   8     138      19                                                         115    0.71    0.23  1.0000
   9  -3  -9       8      10                                                           2    2.89    0.02  1.0000
  -9   3   9       2       9                                                           9    2.89   -0.02  1.0000
  -9   3   9       1      11                                                          11    2.89   -0.02  1.0000
  10  -3 -10     498      39                                                         348    2.44   -0.12  1.0000
 -10   3  10     569      39                                                         408    2.44    0.12  1.0000
 -10   3  10     564      39                                                         404    2.44    0.12  1.0000
  11  -3 -11     202      31                                                         187   -0.36   -0.10  1.0000
 -11   3  11     289      32                                                         271   -0.36    0.10  1.0000
 -11   3  11     319      33                                                         300   -0.36    0.10  1.0000
 -12   3  12      16      16                                                          22   -0.44    0.01  1.0000
 -12   3  12      23      17                                                          30   -0.44    0.01  1.0000
 -11  -4  11     165      25                                                         136   -0.80    0.03  1.0000
  11   4 -11     122      23                                                          97   -0.80   -0.03  1.0000
 -10  -4  10     135      22                                                         148    0.35    0.01  1.0000
 -10  -4  10     157      22                                                         170    0.35    0.01  1.0000
 -10  -4  10     179      26                                                         193    0.35    0.01  1.0000
  -9  -4   9       0       9                                                          18    3.08    0.30  1.0000
  -9  -4   9      21       7                                                          -8    3.08    0.30  1.0000
  -9  -4   9      13       7                                                           1    3.08    0.30  1.0000
  -8  -4   8    1040      75                                                        1120    0.82   -0.18  1.0000
  -8  -4   8    1095      88                                                        1177    0.82   -0.18  1.0000
  -8  -4   8    1028      75                                                        1108    0.82   -0.18  1.0000
  -7  -4   7     175      25                                                         198   -0.56    0.04  1.0000
  -7  -4   7     232      23                                                         258   -0.56    0.04  1.0000
  -7  -4   7     185      27                                                         208   -0.56    0.04  1.0000
  -7  -4   7     205      22                                                         230   -0.56    0.04  1.0000
  -6  -4   6     441      63                                                         664    3.19    0.12  1.0000
  -6  -4   6     505      50                                                         742    3.19    0.12  1.0000
  -6  -4   6     507      50                                                         744    3.19    0.12  1.0000
  -6  -4   6     562      58                                                         810    3.19    0.12  1.0000
   6   4  -6     476      53                                                         706    3.19   -0.12  1.0000
  -5  -4   5    1581     164                                                        2667   -7.95   -0.17  1.0000
  -5  -4   5    1602     212                                                        2694   -7.95   -0.17  1.0000
  -5  -4   5    1686     191                                                        2802   -7.95   -0.17  1.0000
  -5  -4   5    1640     165                                                        2743   -7.95   -0.17  1.0000
  -5  -4   5    1813     192                                                        2965   -7.95   -0.17  1.0000
   5   4  -5    1550     174                                                        2626   -7.95    0.17  1.0000
  -4  -4   4    2999      90                                                        1451  -11.15    0.06  1.0000
  -4  -4   4    3079     104                                                        1507  -11.15    0.06  1.0000
  -4  -4   4    3026      91                                                        1470  -11.15    0.06  1.0000
  -4  -4   4    3182     106                                                        1579  -11.15    0.06  1.0000
   4   4  -4    2909      95                                                        1389  -11.15   -0.06  1.0000
  -3  -4   3    8136     381                                                        6627    5.88    0.13  1.0000
  -3  -4   3    8489     442                                                        6946    5.88    0.13  1.0000
  -3  -4   3    7800     380                                                        6324    5.88    0.13  1.0000
  -3  -4   3    8001     441                                                        6506    5.88    0.13  1.0000
   3   4  -3    7767     402                                                        6295    5.88   -0.13  1.0000
  -2  -4   2    1285     228                                                        3333   14.65   -0.13  1.0000
  -2  -4   2    1460     228                                                        3612   14.65   -0.13  1.0000
  -2  -4   2    1310     255                                                        3374   14.65   -0.13  1.0000
  -2  -4   2    1312     197                                                        3376   14.65   -0.13  1.0000
  -2  -4   2    1316     197                                                        3383   14.65   -0.13  1.0000
   2   4  -2    1098     208                                                        3028   14.65    0.13  1.0000
  -1  -4   1     161      16                                                         206   17.95   -0.94  1.0000
  -1  -4   1     172      20                                                         194   17.95   -0.94  1.0000
  -1  -4   1     187      18                                                         178   17.95   -0.94  1.0000
  -1  -4   1     158      18                                                         210   17.95   -0.94  1.0000
  -1  -4   1     183      16                                                         182   17.95   -0.94  1.0000
  -1  -4   1     168      18                                                         198   17.95   -0.94  1.0000
   1   4  -1     189      15                                                         176   17.95    0.94  1.0000
   1   4  -1     178      16                                                         187   17.95    0.94  1.0000
   0  -4   0    1611     301                                                        3914   15.00   -0.04  1.0000
   0  -4   0    2240     260                                                        4865   15.00   -0.04  1.0000
   0  -4   0    1917     274                                                        4384   15.00   -0.04  1.0000
   0  -4   0    2129     261                                                        4702   15.00   -0.04  1.0000
   0   4   0    1926     260                                                        4397   15.00    0.04  1.0000
   0   4   0    1901     237                                                        4360   15.00    0.04  1.0000
   0   4   0    1941     259                                                        4420   15.00    0.04  1.0000
   1  -4  -1       4      68                                                         978  -22.27    0.66  1.0000
   1  -4  -1       0      71                                                        1137  -22.27    0.66  1.0000
   1  -4  -1      11      78                                                         904  -22.27    0.66  1.0000
   1  -4  -1       0      71                                                        1124  -22.27    0.66  1.0000
  -1   4   1       1      74                                                        1063  -22.27   -0.66  1.0000
  -1   4   1       2      62                                                        1013  -22.27   -0.66  1.0000
  -1   4   1       2      80                                                        1195  -22.27   -0.66  1.0000
  -1   4   1       3      69                                                        1223  -22.27   -0.66  1.0000
  -1   4   1       0      69                                                        1141  -22.27   -0.66  1.0000
   2  -4  -2    6339     289                                                        4078  -10.54   -0.11  1.0000
   2  -4  -2    6471     249                                                        4184  -10.54   -0.11  1.0000
   2  -4  -2    6952     263                                                        4573  -10.54   -0.11  1.0000
  -2   4   2    5926     249                                                        3748  -10.54    0.11  1.0000
  -2   4   2    7160     267                                                        4742  -10.54    0.11  1.0000
  -2   4   2    5825     248                                                        3668  -10.54    0.11  1.0000
  -2   4   2    6793     227                                                        4444  -10.54    0.11  1.0000
  -2   4   2    6586     289                                                        4277  -10.54    0.11  1.0000
   3  -4  -3   13516     777                                                       13066    1.30   -0.06  1.0000
   3  -4  -3   12372     734                                                       11942    1.30   -0.06  1.0000
   3  -4  -3   13683     852                                                       13230    1.30   -0.06  1.0000
  -3   4   3   12671     735                                                       12236    1.30    0.06  1.0000
  -3   4   3   13865     668                                                       13409    1.30    0.06  1.0000
  -3   4   3   13300     851                                                       12854    1.30    0.06  1.0000
  -3   4   3   11108     731                                                       10701    1.30    0.06  1.0000
  -3   4   3   13878     779                                                       13422    1.30    0.06  1.0000
   4  -4  -4    1559     107                                                        1369   -1.66    0.01  1.0000
   4  -4  -4    1608      93                                                        1415   -1.66    0.01  1.0000
   4  -4  -4    1724      98                                                        1524   -1.66    0.01  1.0000
   4  -4  -4    1618      98                                                        1424   -1.66    0.01  1.0000
  -4   4   4    1498      93                                                        1312   -1.66   -0.01  1.0000
  -4   4   4    1883     121                                                        1673   -1.66   -0.01  1.0000
  -4   4   4    1689      94                                                        1491   -1.66   -0.01  1.0000
  -4   4   4    1676      85                                                        1479   -1.66   -0.01  1.0000
  -4   4   4    1781     108                                                        1577   -1.66   -0.01  1.0000
  -4   4   4    1545      98                                                        1356   -1.66   -0.01  1.0000
   5  -4  -5       4       8                                                           2    2.30   -0.25  1.0000
   5  -4  -5       6       8                                                           1    2.30   -0.25  1.0000
   5  -4  -5       0       6                                                           9    2.30   -0.25  1.0000
   5  -4  -5       6       9                                                           1    2.30   -0.25  1.0000
  -5   4   5       1       7                                                           7    2.30    0.25  1.0000
  -5   4   5      12       6                                                          -2    2.30    0.25  1.0000
  -5   4   5       4      10                                                           2    2.30    0.25  1.0000
  -5   4   5      12       6                                                          -6    2.30    0.25  1.0000
  -5   4   5       2       7                                                           5    2.30    0.25  1.0000
  -5   4   5       2       8                                                           5    2.30    0.25  1.0000
   6  -4  -6      26      26                                                         241    6.97    0.07  1.0000
   6  -4  -6      41      26                                                         282    6.97    0.07  1.0000
   6  -4  -6      26      27                                                         240    6.97    0.07  1.0000
  -6   4   6      26      29                                                         240    6.97   -0.07  1.0000
  -6   4   6      27      27                                                         245    6.97   -0.07  1.0000
  -6   4   6      31      25                                                         255    6.97   -0.07  1.0000
  -6   4   6      65      29                                                         342    6.97   -0.07  1.0000
   7  -4  -7      10      12                                                          22    0.91    0.56  1.0000
   7  -4  -7       5       9                                                          14    0.91    0.56  1.0000
   7  -4  -7       3       7                                                          12    0.91    0.56  1.0000
  -7   4   7       2       9                                                          10    0.91   -0.56  1.0000
  -7   4   7       5      10                                                          14    0.91   -0.56  1.0000
  -7   4   7       4      10                                                          13    0.91   -0.56  1.0000
   8  -4  -8     913      55                                                         733   -2.10    0.08  1.0000
  -8   4   8     845      53                                                         672   -2.10   -0.08  1.0000
  -8   4   8     729      50                                                         569   -2.10   -0.08  1.0000
   9  -4  -9     116      29                                                         245   -3.27    0.00  1.0000
  -9   4   9      86      27                                                         200   -3.27    0.00  1.0000
  -9   4   9      55      24                                                         152   -3.27    0.00  1.0000
  10  -4 -10      29      13                                                           9   -1.59    0.06  1.0000
 -10   4  10      23      11                                                           6   -1.59   -0.06  1.0000
 -10   4  10      29      11                                                           9   -1.59   -0.06  1.0000
  11  -4 -11     120      29                                                         155    1.00    0.00  1.0000
 -11   4  11      99      24                                                         131    1.00    0.00  1.0000
 -11   4  11     132      27                                                         169    1.00    0.00  1.0000
 -11  -5  11     442      50                                                         474    0.50   -0.10  1.0000
  11   5 -11     477      48                                                         510    0.50    0.10  1.0000
 -10  -5  10      90      21                                                         113   -0.75    0.03  1.0000
  -9  -5   9     915      49                                                         683   -2.75   -0.11  1.0000
  -9  -5   9     859      48                                                         635   -2.75   -0.11  1.0000
  -9  -5   9     846      56                                                         624   -2.75   -0.11  1.0000
  -8  -5   8     726      51                                                         716   -0.12    0.14  1.0000
  -8  -5   8     705      59                                                         695   -0.12    0.14  1.0000
  -8  -5   8     749      51                                                         739   -0.12    0.14  1.0000
  -7  -5   7    1299     127                                                        1395    0.87   -0.15  1.0000
  -7  -5   7    1545     116                                                        1649    0.87   -0.15  1.0000
  -7  -5   7    1551     100                                                        1656    0.87   -0.15  1.0000
  -7  -5   7    1484      99                                                        1586    0.87   -0.15  1.0000
  -6  -5   6     291      23                                                         207   -1.79    0.00  1.0000
  -6  -5   6     289      20                                                         205   -1.79    0.00  1.0000
  -6  -5   6     315      21                                                         227   -1.79    0.00  1.0000
  -5  -5   5    5205     451                                                        7365    9.15    0.07  1.0000
  -5  -5   5    6143     525                                                        8474    9.15    0.07  1.0000
  -5  -5   5    5499     523                                                        7715    9.15    0.07  1.0000
  -5  -5   5    5478     450                                                        7690    9.15    0.07  1.0000
   5   5  -5    5237     477                                                        7404    9.15   -0.07  1.0000
  -4  -5   4    1887     211                                                        3075    8.03   -0.25  1.0000
  -4  -5   4    1874     182                                                        3058    8.03   -0.25  1.0000
  -4  -5   4    1875     212                                                        3059    8.03   -0.25  1.0000
  -4  -5   4    1893     182                                                        3082    8.03   -0.25  1.0000
   4   5  -4    1860     192                                                        3041    8.03    0.25  1.0000
  -3  -5   3   16359     772                                                       12443  -10.94    0.13  1.0000
  -3  -5   3   15294     772                                                       11517  -10.94    0.13  1.0000
  -3  -5   3   15271     664                                                       11497  -10.94    0.13  1.0000
  -3  -5   3   14810     666                                                       11097  -10.94    0.13  1.0000
   3   5  -3   14458     703                                                       10793  -10.94   -0.13  1.0000
  -2  -5   2    7632     320                                                        4314  -14.51    0.36  1.0000
  -2  -5   2    7273     286                                                        4045  -14.51    0.36  1.0000
  -2  -5   2    7496     247                                                        4212  -14.51    0.36  1.0000
  -2  -5   2    7637     286                                                        4318  -14.51    0.36  1.0000
  -2  -5   2    7580     247                                                        4275  -14.51    0.36  1.0000
   2   5  -2    7496     247                                                        4212  -14.51   -0.36  1.0000
   2   5  -2    7279     261                                                        4050  -14.51   -0.36  1.0000
  -1  -5   1    6167     240                                                        4014  -10.16    0.65  1.0000
  -1  -5   1    6642     278                                                        4399  -10.16    0.65  1.0000
  -1  -5   1    6263     277                                                        4092  -10.16    0.65  1.0000
  -1  -5   1    6470     310                                                        4259  -10.16    0.65  1.0000
  -1  -5   1    6061     239                                                        3929  -10.16    0.65  1.0000
  -1  -5   1    5757     277                                                        3685  -10.16    0.65  1.0000
   1   5  -1    6211     239                                                        4050  -10.16   -0.65  1.0000
   1   5  -1    6302     240                                                        4123  -10.16   -0.65  1.0000
   0  -5   0    1572     181                                                        2305   -5.59   -0.41  1.0000
   0  -5   0    1825     164                                                        2609   -5.59   -0.41  1.0000
   0  -5   0    2002     157                                                        2820   -5.59   -0.41  1.0000
   0  -5   0    1953     157                                                        2762   -5.59   -0.41  1.0000
   0  -5   0    1974     165                                                        2786   -5.59   -0.41  1.0000
   0   5   0    1795     157                                                        2573   -5.59    0.41  1.0000
   0   5   0    1763     143                                                        2535   -5.59    0.41  1.0000
   0   5   0    1775     156                                                        2549   -5.59    0.41  1.0000
   1  -5  -1    4299     515                                                        8958   19.45   -0.45  1.0000
   1  -5  -1    4142     544                                                        8730   19.45   -0.45  1.0000
   1  -5  -1    4047     597                                                        8593   19.45   -0.45  1.0000
   1  -5  -1    4076     543                                                        8634   19.45   -0.45  1.0000
  -1   5   1    4252     469                                                        8890   19.45    0.45  1.0000
  -1   5   1    4538     514                                                        9301   19.45    0.45  1.0000
  -1   5   1    4010     515                                                        8539   19.45    0.45  1.0000
  -1   5   1    4222     597                                                        8846   19.45    0.45  1.0000
  -1   5   1    4236     547                                                        8867   19.45    0.45  1.0000
   2  -5  -2       3      16                                                         134    6.72    0.30  1.0000
   2  -5  -2       4      19                                                         144    6.72    0.30  1.0000
   2  -5  -2       1      15                                                         120    6.72    0.30  1.0000
   2  -5  -2       3      15                                                         139    6.72    0.30  1.0000
  -2   5   2       5      16                                                         150    6.72   -0.30  1.0000
  -2   5   2       8      19                                                         166    6.72   -0.30  1.0000
  -2   5   2       2      19                                                         133    6.72   -0.30  1.0000
  -2   5   2       1      15                                                         125    6.72   -0.30  1.0000
  -2   5   2       6      16                                                         157    6.72   -0.30  1.0000
   3  -5  -3     114      13                                                          76   -1.30   -0.03  1.0000
   3  -5  -3     111      12                                                          74   -1.30   -0.03  1.0000
   3  -5  -3     133      15                                                          92   -1.30   -0.03  1.0000
   3  -5  -3     147      17                                                         104   -1.30   -0.03  1.0000
  -3   5   3     121      13                                                          82   -1.30    0.03  1.0000
  -3   5   3     122      13                                                          83   -1.30    0.03  1.0000
  -3   5   3     106      14                                                          70   -1.30    0.03  1.0000
  -3   5   3     110      18                                                          73   -1.30    0.03  1.0000
  -3   5   3     106      12                                                          70   -1.30    0.03  1.0000
   4  -5  -4    3108     216                                                        3153    0.27    0.03  1.0000
   4  -5  -4    3267     196                                                        3313    0.27    0.03  1.0000
   4  -5  -4    2982     195                                                        3026    0.27    0.03  1.0000
   4  -5  -4    2934     186                                                        2977    0.27    0.03  1.0000
  -4   5   4    3094     170                                                        3139    0.27   -0.03  1.0000
  -4   5   4    2959     186                                                        3003    0.27   -0.03  1.0000
  -4   5   4    3040     197                                                        3084    0.27   -0.03  1.0000
  -4   5   4    2518     237                                                        2558    0.27   -0.03  1.0000
  -4   5   4    3141     215                                                        3186    0.27   -0.03  1.0000
   5  -5  -5    1937     148                                                        2509   -4.07    0.16  1.0000
   5  -5  -5    1962     155                                                        2537   -4.07    0.16  1.0000
   5  -5  -5    1797     155                                                        2349   -4.07    0.16  1.0000
   5  -5  -5    1691     170                                                        2228   -4.07    0.16  1.0000
  -5   5   5    1619     134                                                        2145   -4.07   -0.16  1.0000
  -5   5   5    1870     170                                                        2433   -4.07   -0.16  1.0000
  -5   5   5    1628     146                                                        2156   -4.07   -0.16  1.0000
  -5   5   5    1877     156                                                        2441   -4.07   -0.16  1.0000
  -5   5   5    1834     149                                                        2392   -4.07   -0.16  1.0000
   6  -5  -6      35      25                                                         215   -5.87   -0.16  1.0000
   6  -5  -6      23      23                                                         185   -5.87   -0.16  1.0000
   6  -5  -6      36      23                                                         219   -5.87   -0.16  1.0000
  -6   5   6      32      23                                                         209   -5.87    0.16  1.0000
  -6   5   6      20      23                                                         176   -5.87    0.16  1.0000
  -6   5   6      41      26                                                         230   -5.87    0.16  1.0000
  -6   5   6      31      24                                                         206   -5.87    0.16  1.0000
  -6   5   6      47      28                                                         244   -5.87    0.16  1.0000
   7  -5  -7    2529     170                                                        2643    0.75   -0.34  1.0000
   7  -5  -7    2652     178                                                        2769    0.75   -0.34  1.0000
   7  -5  -7    2339     177                                                        2449    0.75   -0.34  1.0000
  -7   5   7    2681     170                                                        2798    0.75    0.34  1.0000
  -7   5   7    2619     197                                                        2735    0.75    0.34  1.0000
  -7   5   7    2641     171                                                        2758    0.75    0.34  1.0000
   8  -5  -8      98      13                                                          28    3.08    0.04  1.0000
  -8   5   8      21       9                                                          -1    3.08   -0.04  1.0000
  -8   5   8      44       9                                                           4    3.08   -0.04  1.0000
   9  -5  -9      53      24                                                         137    2.96   -0.10  1.0000
  -9   5   9      48      21                                                         128    2.96    0.10  1.0000
  -9   5   9      39      22                                                         114    2.96    0.10  1.0000
  10  -5 -10      94      24                                                         111    0.55    0.00  1.0000
 -10   5  10     132      26                                                         151    0.55    0.00  1.0000
 -10   5  10     158      27                                                         179    0.55    0.00  1.0000
  11  -5 -11     284      34                                                         223   -1.28    0.02  1.0000
 -11   5  11     336      35                                                         269   -1.28   -0.02  1.0000
 -11   5  11     291      34                                                         229   -1.28   -0.02  1.0000
 -11  -6  11     122      27                                                         131   -0.26    0.09  1.0000
 -10  -6  10      56      19                                                          78    0.91   -0.10  1.0000
  -9  -6   9      12      10                                                           0    2.28    0.00  1.0000
  -9  -6   9       6       7                                                           1    2.28    0.00  1.0000
  -8  -6   8     167      19                                                         175   -0.20   -0.11  1.0000
  -8  -6   8     164      22                                                         172   -0.20   -0.11  1.0000
  -8  -6   8     156      19                                                         164   -0.20   -0.11  1.0000
  -7  -6   7    1626     126                                                        1782   -1.26    0.12  1.0000
  -7  -6   7    1559     108                                                        1712   -1.26    0.12  1.0000
  -7  -6   7    1520     108                                                        1671   -1.26    0.12  1.0000
  -6  -6   6    1061      70                                                        1083    0.23   -0.04  1.0000
  -6  -6   6    1061      81                                                        1083    0.23   -0.04  1.0000
  -6  -6   6    1033      69                                                        1055    0.23   -0.04  1.0000
  -5  -6   5    1093      32                                                         384   -9.01    0.05  1.0000
  -5  -6   5    1037      28                                                         351   -9.01    0.05  1.0000
  -5  -6   5    1083      29                                                         378   -9.01    0.05  1.0000
   5   6  -5    1018      29                                                         340   -9.01   -0.05  1.0000
  -4  -6   4    2636     140                                                        2088   -3.78    0.24  1.0000
  -4  -6   4    2500     120                                                        1967   -3.78    0.24  1.0000
  -4  -6   4    2566     139                                                        2025   -3.78    0.24  1.0000
  -4  -6   4    2419     120                                                        1895   -3.78    0.24  1.0000
   4   6  -4    2416     127                                                        1892   -3.78   -0.24  1.0000
  -3  -6   3     485     113                                                        1850   14.03   -0.43  1.0000
  -3  -6   3     507     113                                                        1892   14.03   -0.43  1.0000
  -3  -6   3     522     131                                                        1922   14.03   -0.43  1.0000
  -3  -6   3     456     130                                                        1793   14.03   -0.43  1.0000
   3   6  -3     453     119                                                        1787   14.03    0.43  1.0000
  -2  -6   2    3467     382                                                        5732   11.26   -0.19  1.0000
  -2  -6   2    3228     329                                                        5424   11.26   -0.19  1.0000
  -2  -6   2    3464     381                                                        5728   11.26   -0.19  1.0000
  -2  -6   2    3262     328                                                        5468   11.26   -0.19  1.0000
  -2  -6   2    3457     425                                                        5719   11.26   -0.19  1.0000
   2   6  -2    3418     329                                                        5670   11.26    0.19  1.0000
   2   6  -2    3289     328                                                        5503   11.26    0.19  1.0000
  -1  -6   1     215      13                                                          94    3.35   -0.18  1.0000
  -1  -6   1     208      11                                                          89    3.35   -0.18  1.0000
  -1  -6   1     164      13                                                          61    3.35   -0.18  1.0000
  -1  -6   1     200      12                                                          84    3.35   -0.18  1.0000
  -1  -6   1     185      15                                                          74    3.35   -0.18  1.0000
  -1  -6   1     202      13                                                          85    3.35   -0.18  1.0000
  -1  -6   1     205      15                                                          87    3.35   -0.18  1.0000
   1   6  -1     194      12                                                          80    3.35    0.18  1.0000
   1   6  -1     183      11                                                          73    3.35    0.18  1.0000
   1   6  -1     181      10                                                          72    3.35    0.18  1.0000
   0  -6   0     147      15                                                         122    0.73    0.47  1.0000
   0  -6   0     159      14                                                         133    0.73    0.47  1.0000
   0  -6   0     177      15                                                         149    0.73    0.47  1.0000
   0  -6   0     167      16                                                         140    0.73    0.47  1.0000
   0  -6   0     130      16                                                         106    0.73    0.47  1.0000
   0   6   0     161      15                                                         134    0.73   -0.47  1.0000
   0   6   0     170      15                                                         143    0.73   -0.47  1.0000
   0   6   0     157      13                                                         131    0.73   -0.47  1.0000
   1  -6  -1    4636     128                                                        1946  -16.04    0.07  1.0000
   1  -6  -1    4845     143                                                        2082  -16.04    0.07  1.0000
   1  -6  -1    4773     129                                                        2035  -16.04    0.07  1.0000
   1  -6  -1    4536     123                                                        1881  -16.04    0.07  1.0000
  -1   6   1    4676     133                                                        1972  -16.04   -0.07  1.0000
  -1   6   1    4819     123                                                        2065  -16.04   -0.07  1.0000
  -1   6   1    4545     112                                                        1887  -16.04   -0.07  1.0000
  -1   6   1    4863     124                                                        2094  -16.04   -0.07  1.0000
   2  -6  -2    3348     164                                                        2642   -4.32   -0.27  1.0000
   2  -6  -2    3106     181                                                        2427   -4.32   -0.27  1.0000
   2  -6  -2    3293     156                                                        2593   -4.32   -0.27  1.0000
   2  -6  -2    2898     163                                                        2244   -4.32   -0.27  1.0000
  -2   6   2    3233     156                                                        2540   -4.32    0.27  1.0000
  -2   6   2    3190     157                                                        2502   -4.32    0.27  1.0000
  -2   6   2    3196     168                                                        2507   -4.32    0.27  1.0000
  -2   6   2    3294     144                                                        2594   -4.32    0.27  1.0000
  -2   6   2    3728     182                                                        2981   -4.32    0.27  1.0000
   3  -6  -3    3632     250                                                        3906    1.49    0.07  1.0000
   3  -6  -3    3680     275                                                        3955    1.49    0.07  1.0000
   3  -6  -3    3370     249                                                        3634    1.49    0.07  1.0000
   3  -6  -3    3364     237                                                        3628    1.49    0.07  1.0000
  -3   6   3    3611     274                                                        3884    1.49   -0.07  1.0000
  -3   6   3    4015     239                                                        4302    1.49   -0.07  1.0000
  -3   6   3    3853     238                                                        4135    1.49   -0.07  1.0000
  -3   6   3    3871     217                                                        4153    1.49   -0.07  1.0000
   4  -6  -4    3889     243                                                        4140    1.33   -0.07  1.0000
   4  -6  -4    3856     255                                                        4106    1.33   -0.07  1.0000
   4  -6  -4    3808     255                                                        4057    1.33   -0.07  1.0000
   4  -6  -4    3719     281                                                        3965    1.33   -0.07  1.0000
  -4   6   4    3530     221                                                        3769    1.33    0.07  1.0000
  -4   6   4    3923     258                                                        4175    1.33    0.07  1.0000
  -4   6   4    3745     280                                                        3992    1.33    0.07  1.0000
  -4   6   4    3628     242                                                        3871    1.33    0.07  1.0000
   5  -6  -5     558      28                                                         272    4.78   -0.03  1.0000
   5  -6  -5     474      24                                                         214    4.78   -0.03  1.0000
   5  -6  -5     522      27                                                         247    4.78   -0.03  1.0000
  -5   6   5     543      29                                                         261    4.78    0.03  1.0000
  -5   6   5     489      26                                                         224    4.78    0.03  1.0000
  -5   6   5     495      24                                                         228    4.78    0.03  1.0000
  -5   6   5     466      27                                                         209    4.78    0.03  1.0000
   6  -6  -6    1119     107                                                        1570    4.13    0.07  1.0000
   6  -6  -6     970     101                                                        1393    4.13    0.07  1.0000
   6  -6  -6    1189     107                                                        1653    4.13    0.07  1.0000
  -6   6   6    1143      94                                                        1599    4.13   -0.07  1.0000
  -6   6   6    1000     116                                                        1428    4.13   -0.07  1.0000
  -6   6   6    1073     108                                                        1515    4.13   -0.07  1.0000
   7  -6  -7       0       7                                                           9   -2.17    0.13  1.0000
   7  -6  -7       2      10                                                           3   -2.17    0.13  1.0000
   7  -6  -7      11       7                                                          -9   -2.17    0.13  1.0000
  -7   6   7       2      10                                                           3   -2.17   -0.13  1.0000
   8  -6  -8     145      15                                                          49   -3.38   -0.08  1.0000
  -8   6   8     131      13                                                          41   -3.38    0.08  1.0000
   9  -6  -9       5      10                                                           1   -2.13    0.17  1.0000
  -9   6   9       3      12                                                          23   -2.13   -0.17  1.0000
  -9   6   9       2      13                                                          18   -2.13   -0.17  1.0000
  10  -6 -10     120      25                                                         131    0.34    0.01  1.0000
 -10   6  10     115      25                                                         126    0.34   -0.01  1.0000
 -10   6  10      96      24                                                         106    0.34   -0.01  1.0000
  11  -6 -11      94      29                                                         138    1.38    0.03  1.0000
 -11   6  11     123      30                                                         173    1.38   -0.03  1.0000
 -11   6  11      78      27                                                         119    1.38   -0.03  1.0000
 -10  -7  10      48      20                                                          67   -0.87    0.07  1.0000
  -9  -7   9      78      14                                                          36   -1.88    0.05  1.0000
  -8  -7   8     148      17                                                         137    0.32    0.16  1.0000
  -8  -7   8     175      22                                                         163    0.32    0.16  1.0000
  -7  -7   7     357      24                                                         259    1.87   -0.11  1.0000
  -7  -7   7     367      29                                                         268    1.87   -0.11  1.0000
  -7  -7   7     404      25                                                         299    1.87   -0.11  1.0000
  -6  -7   6      69      12                                                          49    0.88    0.02  1.0000
  -6  -7   6     102      13                                                          77    0.88    0.02  1.0000
  -6  -7   6      98      14                                                          74    0.88    0.02  1.0000
  -5  -7   5     853      31                                                         324    7.49   -0.02  1.0000
  -5  -7   5     880      27                                                         341    7.49   -0.02  1.0000
  -5  -7   5     864      27                                                         331    7.49   -0.02  1.0000
  -4  -7   4    3408     208                                                        3449   -0.23   -0.15  1.0000
  -4  -7   4    3606     242                                                        3648   -0.23   -0.15  1.0000
  -4  -7   4    3492     209                                                        3534   -0.23   -0.15  1.0000
   4   7  -4    3318     221                                                        3359   -0.23    0.15  1.0000
  -3  -7   3     459       8                                                          21  -14.47    0.48  1.0000
  -3  -7   3     458       8                                                          17  -14.47    0.48  1.0000
  -3  -7   3     457       7                                                          10  -14.47    0.48  1.0000
  -3  -7   3     458       7                                                           8  -14.47    0.48  1.0000
   3   7  -3     457       7                                                          10  -14.47   -0.48  1.0000
  -2  -7   2     892      99                                                        1581   -6.62   -0.18  1.0000
  -2  -7   2     963     129                                                        1675   -6.62   -0.18  1.0000
  -2  -7   2     870     115                                                        1552   -6.62   -0.18  1.0000
  -2  -7   2     906      99                                                        1599   -6.62   -0.18  1.0000
  -2  -7   2     927     114                                                        1627   -6.62   -0.18  1.0000
   2   7  -2     875      99                                                        1558   -6.62    0.18  1.0000
   2   7  -2     865      98                                                        1545   -6.62    0.18  1.0000
  -1  -7   1      27      13                                                          52    1.37    0.03  1.0000
  -1  -7   1      38      12                                                          68    1.37    0.03  1.0000
  -1  -7   1      18      10                                                          40    1.37    0.03  1.0000
  -1  -7   1      31      15                                                          58    1.37    0.03  1.0000
  -1  -7   1      19      12                                                          41    1.37    0.03  1.0000
  -1  -7   1      28      12                                                          54    1.37    0.03  1.0000
  -1  -7   1      22      10                                                          45    1.37    0.03  1.0000
  -1  -7   1      28      11                                                          54    1.37    0.03  1.0000
   1   7  -1      22      11                                                          45    1.37   -0.03  1.0000
   1   7  -1      25      10                                                          49    1.37   -0.03  1.0000
   1   7  -1      27      10                                                          53    1.37   -0.03  1.0000
   0  -7   0     654      41                                                         555    1.34   -0.19  1.0000
   0  -7   0     647      41                                                         549    1.34   -0.19  1.0000
   0  -7   0     581      46                                                         488    1.34   -0.19  1.0000
   0  -7   0     672      53                                                         572    1.34   -0.19  1.0000
   0  -7   0     726      42                                                         622    1.34   -0.19  1.0000
   0  -7   0     701      42                                                         599    1.34   -0.19  1.0000
   0   7   0     638      38                                                         541    1.34    0.19  1.0000
   0   7   0     676      41                                                         576    1.34    0.19  1.0000
   0   7   0     695      42                                                         593    1.34    0.19  1.0000
   1  -7  -1    1758     261                                                        3795   13.16    0.10  1.0000
   1  -7  -1    1630     236                                                        3605   13.16    0.10  1.0000
   1  -7  -1    1763     236                                                        3801   13.16    0.10  1.0000
   1  -7  -1    1676     225                                                        3673   13.16    0.10  1.0000
  -1   7   1    1800     225                                                        3856   13.16   -0.10  1.0000
  -1   7   1    1724     241                                                        3744   13.16   -0.10  1.0000
  -1   7   1    1840     226                                                        3914   13.16   -0.10  1.0000
  -1   7   1    1580     205                                                        3531   13.16   -0.10  1.0000
   2  -7  -2     760      42                                                         580    2.34    0.12  1.0000
   2  -7  -2     731      44                                                         555    2.34    0.12  1.0000
   2  -7  -2     847      45                                                         656    2.34    0.12  1.0000
   2  -7  -2     811      50                                                         625    2.34    0.12  1.0000
  -2   7   2     735      49                                                         558    2.34   -0.12  1.0000
  -2   7   2     722      43                                                         547    2.34   -0.12  1.0000
  -2   7   2     758      41                                                         578    2.34   -0.12  1.0000
  -2   7   2     652      42                                                         486    2.34   -0.12  1.0000
  -2   7   2     687      48                                                         516    2.34   -0.12  1.0000
   3  -7  -3    5372     278                                                        4947   -1.98    0.01  1.0000
   3  -7  -3    5463     322                                                        5034   -1.98    0.01  1.0000
   3  -7  -3    4774     291                                                        4374   -1.98    0.01  1.0000
   3  -7  -3    5277     292                                                        4856   -1.98    0.01  1.0000
  -3   7   3    4255     275                                                        3878   -1.98   -0.01  1.0000
  -3   7   3    4470     319                                                        4083   -1.98   -0.01  1.0000
  -3   7   3    5652     254                                                        5216   -1.98   -0.01  1.0000
  -3   7   3    5007     296                                                        4597   -1.98   -0.01  1.0000
   4  -7  -4      53       9                                                          14   -2.40    0.12  1.0000
   4  -7  -4      49       9                                                          12   -2.40    0.12  1.0000
  -4   7   4      45      12                                                          10   -2.40   -0.12  1.0000
  -4   7   4      66      10                                                          21   -2.40   -0.12  1.0000
   5  -7  -5     231      39                                                         495   -4.72    0.00  1.0000
   5  -7  -5     145      37                                                         364   -4.72    0.00  1.0000
   5  -7  -5     149      35                                                         371   -4.72    0.00  1.0000
  -5   7   5     131      42                                                         343   -4.72    0.00  1.0000
  -5   7   5     152      39                                                         376   -4.72    0.00  1.0000
  -5   7   5     210      36                                                         465   -4.72    0.00  1.0000
   6  -7  -6     545      40                                                         402   -2.21   -0.01  1.0000
   6  -7  -6     598      40                                                         447   -2.21   -0.01  1.0000
  -6   7   6     545      44                                                         402   -2.21    0.01  1.0000
  -6   7   6     622      38                                                         468   -2.21    0.01  1.0000
  -6   7   6     614      44                                                         461   -2.21    0.01  1.0000
   7  -7  -7      64      11                                                          11    3.13   -0.07  1.0000
   7  -7  -7      77      10                                                          17    3.13   -0.07  1.0000
  -7   7   7      79      11                                                          18    3.13    0.07  1.0000
  -7   7   7      22       9                                                          -8    3.13    0.07  1.0000
   8  -7  -8     207      19                                                          98    3.00    0.12  1.0000
   8  -7  -8     207      21                                                          98    3.00    0.12  1.0000
   9  -7  -9      38      14                                                          22    1.24   -0.22  1.0000
  -9   7   9      33      12                                                          18    1.24    0.22  1.0000
  -9   7   9      54      14                                                          35    1.24    0.22  1.0000
  10  -7 -10     197      28                                                         155   -1.06   -0.07  1.0000
 -10   7  10     183      27                                                         143   -1.06    0.07  1.0000
 -10   7  10     230      28                                                         185   -1.06    0.07  1.0000
  11  -7 -11     134      34                                                         188   -1.43   -0.03  1.0000
 -11   7  11     143      32                                                         198   -1.43    0.03  1.0000
 -11   7  11     125      32                                                         177   -1.43    0.03  1.0000
 -10  -8  10      23      15                                                          33    0.63   -0.01  1.0000
  -9  -8   9       6      13                                                          23    1.57   -0.07  1.0000
  -8  -8   8     345      38                                                         374   -0.52   -0.16  1.0000
  -7  -8   7     120      21                                                         217   -2.52    0.09  1.0000
  -7  -8   7      88      23                                                         173   -2.52    0.09  1.0000
  -6  -8   6     173      23                                                         221   -1.15   -0.03  1.0000
  -6  -8   6     190      23                                                         240   -1.15   -0.03  1.0000
  -6  -8   6     222      28                                                         276   -1.15   -0.03  1.0000
  -5  -8   5    5783     482                                                        7060   -5.34   -0.02  1.0000
  -5  -8   5    5764     415                                                        7039   -5.34   -0.02  1.0000
  -5  -8   5    5808     414                                                        7088   -5.34   -0.02  1.0000
  -4  -8   4      18       7                                                           0    2.82    0.11  1.0000
  -4  -8   4      45       8                                                           9    2.82    0.11  1.0000
  -4  -8   4      28       6                                                           2    2.82    0.11  1.0000
  -3  -8   3    3036      85                                                        1297   12.77   -0.33  1.0000
  -3  -8   3    3182     100                                                        1393   12.77   -0.33  1.0000
  -3  -8   3    3080      85                                                        1326   12.77   -0.33  1.0000
  -2  -8   2    3072     190                                                        2677    2.47    0.42  1.0000
  -2  -8   2    3173     212                                                        2771    2.47    0.42  1.0000
  -2  -8   2    3136     164                                                        2737    2.47    0.42  1.0000
  -2  -8   2    3046     163                                                        2653    2.47    0.42  1.0000
   2   8  -2    2996     162                                                        2606    2.47   -0.42  1.0000
  -1  -8   1    4149     369                                                        4951   -3.98   -0.25  1.0000
  -1  -8   1    4272     287                                                        5085   -3.98   -0.25  1.0000
  -1  -8   1    4001     332                                                        4789   -3.98   -0.25  1.0000
  -1  -8   1    4003     285                                                        4792   -3.98   -0.25  1.0000
   1   8  -1    3863     260                                                        4638   -3.98    0.25  1.0000
   1   8  -1    3887     284                                                        4664   -3.98    0.25  1.0000
   1   8  -1    3922     286                                                        4703   -3.98    0.25  1.0000
   0  -8   0      50      15                                                         105   -2.11   -0.06  1.0000
   0  -8   0      54      21                                                         110   -2.11   -0.06  1.0000
   0  -8   0      57      17                                                         114   -2.11   -0.06  1.0000
   0  -8   0      37      15                                                          85   -2.11   -0.06  1.0000
   0  -8   0      55      16                                                         111   -2.11   -0.06  1.0000
   0   8   0      55      15                                                         111   -2.11    0.06  1.0000
   0   8   0      59      16                                                         118   -2.11    0.06  1.0000
   0   8   0      50      15                                                         104   -2.11    0.06  1.0000
   1  -8  -1     818     118                                                        1963  -10.51    0.00  1.0000
   1  -8  -1     719     122                                                        1808  -10.51    0.00  1.0000
   1  -8  -1     654     122                                                        1705  -10.51    0.00  1.0000
   1  -8  -1     784     137                                                        1911  -10.51    0.00  1.0000
  -1   8   1     759     128                                                        1871  -10.51    0.00  1.0000
  -1   8   1     798     119                                                        1932  -10.51    0.00  1.0000
  -1   8   1     726     108                                                        1820  -10.51    0.00  1.0000
  -1   8   1     792     118                                                        1924  -10.51    0.00  1.0000
   2  -8  -2    1104      85                                                        1143   -0.39   -0.02  1.0000
   2  -8  -2    1194      83                                                        1235   -0.39   -0.02  1.0000
   2  -8  -2    1195      96                                                        1236   -0.39   -0.02  1.0000
   2  -8  -2    1301      87                                                        1343   -0.39   -0.02  1.0000
  -2   8   2    1118      82                                                        1157   -0.39    0.02  1.0000
  -2   8   2    1200      92                                                        1241   -0.39    0.02  1.0000
  -2   8   2    1342      85                                                        1385   -0.39    0.02  1.0000
  -2   8   2    1164      77                                                        1204   -0.39    0.02  1.0000
   3  -8  -3     141      27                                                         238    2.39   -0.14  1.0000
   3  -8  -3     208      34                                                         324    2.39   -0.14  1.0000
   3  -8  -3     207      29                                                         322    2.39   -0.14  1.0000
   3  -8  -3     172      27                                                         278    2.39   -0.14  1.0000
  -3   8   3     154      28                                                         256    2.39    0.14  1.0000
  -3   8   3     182      27                                                         291    2.39    0.14  1.0000
  -3   8   3     193      36                                                         305    2.39    0.14  1.0000
  -3   8   3     179      28                                                         288    2.39    0.14  1.0000
   4  -8  -4     127      12                                                          43    3.17   -0.13  1.0000
   4  -8  -4     138      15                                                          49    3.17   -0.13  1.0000
   4  -8  -4     146      15                                                          54    3.17   -0.13  1.0000
   4  -8  -4     207      17                                                          93    3.17   -0.13  1.0000
  -4   8   4     133      14                                                          46    3.17    0.13  1.0000
  -4   8   4     131      13                                                          45    3.17    0.13  1.0000
  -4   8   4     129      14                                                          44    3.17    0.13  1.0000
  -4   8   4     131      18                                                          45    3.17    0.13  1.0000
   5  -8  -5      14      17                                                          98    4.08   -0.01  1.0000
   5  -8  -5       6      18                                                          74    4.08   -0.01  1.0000
  -5   8   5       8      22                                                          81    4.08    0.01  1.0000
  -5   8   5       0      13                                                          43    4.08    0.01  1.0000
   6  -8  -6     671      60                                                         694    0.30    0.06  1.0000
   6  -8  -6     683      60                                                         707    0.30    0.06  1.0000
  -6   8   6     759      54                                                         784    0.30   -0.06  1.0000
  -6   8   6     767      64                                                         792    0.30   -0.06  1.0000
   7  -8  -7      26      11                                                           0   -3.44    0.08  1.0000
   7  -8  -7      26       9                                                          -3   -3.44    0.08  1.0000
  -7   8   7      84      11                                                          18   -3.44   -0.08  1.0000
   8  -8  -8     354      31                                                         235   -2.33   -0.11  1.0000
   8  -8  -8     394      32                                                         268   -2.33   -0.11  1.0000
   9  -8  -9       1      11                                                          -9   -0.43    0.23  1.0000
  -9   8   9       1      10                                                          -2   -0.43   -0.23  1.0000
  -9   8   9       1       9                                                          -4   -0.43   -0.23  1.0000
  10  -8 -10       2      16                                                          14    1.68    0.04  1.0000
 -10   8  10       0      14                                                           7    1.68   -0.04  1.0000
 -10   8  10       5      16                                                          22    1.68   -0.04  1.0000
  11  -8 -11      85      22                                                          53    1.30    0.01  1.0000
  -9  -9   9      19      12                                                           6   -1.25    0.00  1.0000
  -8  -9   8     291      30                                                         245    0.94    0.13  1.0000
  -7  -9   7       6      14                                                          46    2.94   -0.02  1.0000
  -6  -9   6    1858     109                                                        1756    0.81   -0.01  1.0000
  -6  -9   6    1815     108                                                        1714    0.81   -0.01  1.0000
  -6  -9   6    1804     127                                                        1703    0.81   -0.01  1.0000
  -5  -9   5     134      24                                                         271    3.28    0.00  1.0000
  -5  -9   5     106      23                                                         231    3.28    0.00  1.0000
  -5  -9   5     118      27                                                         249    3.28    0.00  1.0000
  -4  -9   4    1076      51                                                         712   -4.10   -0.08  1.0000
  -4  -9   4    1113      60                                                         742   -4.10   -0.08  1.0000
  -4  -9   4    1112      52                                                         741   -4.10   -0.08  1.0000
  -3  -9   3    1538      49                                                         585  -10.06    0.12  1.0000
  -3  -9   3    1590      43                                                         617  -10.06    0.12  1.0000
  -3  -9   3    1452      42                                                         532  -10.06    0.12  1.0000
  -2  -9   2     596      50                                                         559    0.53   -0.40  1.0000
  -2  -9   2     671      58                                                         632    0.53   -0.40  1.0000
  -2  -9   2     670      45                                                         631    0.53   -0.40  1.0000
  -2  -9   2     613      44                                                         575    0.53   -0.40  1.0000
  -1  -9   1      27      19                                                         150    4.76    0.54  1.0000
  -1  -9   1      48      27                                                         196    4.76    0.54  1.0000
  -1  -9   1      53      24                                                         206    4.76    0.54  1.0000
  -1  -9   1      49      21                                                         199    4.76    0.54  1.0000
   0  -9   0     297      25                                                         206    1.93    0.06  1.0000
   0  -9   0     311      30                                                         218    1.93    0.06  1.0000
   0  -9   0     291      21                                                         201    1.93    0.06  1.0000
   0   9   0     239      21                                                         158    1.93   -0.06  1.0000
   0   9   0     276      21                                                         189    1.93   -0.06  1.0000
   0   9   0     275      20                                                         188    1.93   -0.06  1.0000
   1  -9  -1      59       9                                                          20    8.15   -0.12  1.0000
   1  -9  -1      59       9                                                          20    8.15   -0.12  1.0000
   1  -9  -1      55       8                                                          23    8.15   -0.12  1.0000
  -1   9   1      74       9                                                          13    8.15    0.12  1.0000
  -1   9   1      59      10                                                          20    8.15    0.12  1.0000
  -1   9   1      61      13                                                          19    8.15    0.12  1.0000
  -1   9   1      47      11                                                          28    8.15    0.12  1.0000
   2  -9  -2      52      17                                                          80   -1.18    0.02  1.0000
   2  -9  -2      59      18                                                          89   -1.18    0.02  1.0000
   2  -9  -2      68      17                                                         100   -1.18    0.02  1.0000
   2  -9  -2      74      15                                                         107   -1.18    0.02  1.0000
  -2   9   2      88      19                                                         124   -1.18   -0.02  1.0000
  -2   9   2      73      22                                                         106   -1.18   -0.02  1.0000
  -2   9   2      72      16                                                         105   -1.18   -0.02  1.0000
  -2   9   2      48      17                                                          75   -1.18   -0.02  1.0000
   3  -9  -3     616      44                                                         419   -2.91    0.16  1.0000
   3  -9  -3     707      40                                                         494   -2.91    0.16  1.0000
   3  -9  -3     661      39                                                         456   -2.91    0.16  1.0000
  -3   9   3     552      34                                                         366   -2.91   -0.16  1.0000
  -3   9   3     732      41                                                         515   -2.91   -0.16  1.0000
  -3   9   3     592      38                                                         399   -2.91   -0.16  1.0000
  -3   9   3     665      45                                                         459   -2.91   -0.16  1.0000
   4  -9  -4    1545     153                                                        2003   -3.65    0.10  1.0000
   4  -9  -4    1510     137                                                        1963   -3.65    0.10  1.0000
   4  -9  -4    1691     138                                                        2169   -3.65    0.10  1.0000
  -4   9   4    1489     121                                                        1939   -3.65   -0.10  1.0000
   5  -9  -5      13      15                                                          59   -2.77    0.02  1.0000
   5  -9  -5       3      14                                                          36   -2.77    0.02  1.0000
  -5   9   5       0      15                                                          20   -2.77   -0.02  1.0000
  -5   9   5      12      14                                                          57   -2.77   -0.02  1.0000
   6  -9  -6     246      35                                                         305    1.19   -0.18  1.0000
   6  -9  -6     334      38                                                         403    1.19   -0.18  1.0000
  -6   9   6     282      38                                                         345    1.19    0.18  1.0000
  -6   9   6     287      34                                                         351    1.19    0.18  1.0000
   7  -9  -7       0      14                                                          26    3.24   -0.10  1.0000
   7  -9  -7      12      19                                                          70    3.24   -0.10  1.0000
  -7   9   7       1      13                                                          32    3.24    0.10  1.0000
   8  -9  -8     195      33                                                         269    1.64    0.07  1.0000
   8  -9  -8     172      33                                                         242    1.64    0.07  1.0000
   9  -9  -9      50      18                                                          43   -0.35   -0.13  1.0000
  -9   9   9      65      20                                                          57   -0.35    0.13  1.0000
  -9   9   9      57      18                                                          49   -0.35    0.13  1.0000
  10  -9 -10      24      22                                                          62   -1.97    0.03  1.0000
 -10   9  10      24      24                                                          62   -1.97   -0.03  1.0000
 -10   9  10      26      22                                                          65   -1.97   -0.03  1.0000
  -9 -10   9      83      19                                                          63    0.78    0.08  1.0000
  -8 -10   8     829      62                                                         714   -1.39   -0.14  1.0000
  -7 -10   7     115      14                                                          39   -2.99   -0.03  1.0000
  -6 -10   6       8       8                                                           6   -0.21    0.10  1.0000
  -6 -10   6       8       8                                                           6   -0.21    0.10  1.0000
  -5 -10   5       4       6                                                          -5   -1.36   -0.02  1.0000
  -5 -10   5       4       7                                                          -4   -1.36   -0.02  1.0000
  -5 -10   5      38       9                                                          17   -1.36   -0.02  1.0000
  -4 -10   4    4169     311                                                        5097    4.56    0.08  1.0000
  -4 -10   4    4310     362                                                        5253    4.56    0.08  1.0000
  -4 -10   4    4381     311                                                        5331    4.56    0.08  1.0000
  -3 -10   3    1244      46                                                         622    6.91    0.03  1.0000
  -3 -10   3    1239      46                                                         618    6.91    0.03  1.0000
  -2 -10   2     907      54                                                         717   -2.24    0.17  1.0000
  -2 -10   2     931      54                                                         738   -2.24    0.17  1.0000
  -2 -10   2    1015      72                                                         813   -2.24    0.17  1.0000
  -1 -10   1     185      43                                                         382   -3.97   -0.56  1.0000
   0 -10   0       5       5                                                          -5   -1.53    0.08  1.0000
   0  10   0      24       8                                                           7   -1.53   -0.08  1.0000
   0  10   0      20       7                                                           5   -1.53   -0.08  1.0000
   1 -10  -1      11      24                                                         167   -6.38    0.09  1.0000
   1 -10  -1       7      20                                                         146   -6.38    0.09  1.0000
  -1  10   1      10      22                                                         163   -6.38   -0.09  1.0000
  -1  10   1      12      21                                                         168   -6.38   -0.09  1.0000
  -1  10   1      15      27                                                         179   -6.38   -0.09  1.0000
  -1  10   1       7      21                                                         146   -6.38   -0.09  1.0000
   2 -10  -2     780      86                                                        1011    2.58    0.04  1.0000
   2 -10  -2     811      74                                                        1046    2.58    0.04  1.0000
  -2  10   2     903      86                                                        1150    2.58   -0.04  1.0000
  -2  10   2     789      76                                                        1021    2.58   -0.04  1.0000
  -2  10   2     774      69                                                        1004    2.58   -0.04  1.0000
  -2  10   2     874      76                                                        1117    2.58   -0.04  1.0000
   3 -10  -3     883      96                                                        1218    3.47   -0.08  1.0000
   3 -10  -3     836      85                                                        1162    3.47   -0.08  1.0000
  -3  10   3     835      76                                                        1161    3.47    0.08  1.0000
  -3  10   3     765      90                                                        1078    3.47    0.08  1.0000
  -3  10   3     873      84                                                        1206    3.47    0.08  1.0000
  -3  10   3     844      83                                                        1172    3.47    0.08  1.0000
   4 -10  -4    1465      80                                                        1102    3.40   -0.12  1.0000
   4 -10  -4    1388      90                                                        1035    3.40   -0.12  1.0000
   4 -10  -4    1523      81                                                        1152    3.40   -0.12  1.0000
  -4  10   4    1302      71                                                         961    3.40    0.12  1.0000
   5 -10  -5    1011      82                                                        1122    1.14    0.04  1.0000
   5 -10  -5     948      82                                                        1056    1.14    0.04  1.0000
  -5  10   5     920      73                                                        1026    1.14   -0.04  1.0000
  -5  10   5    1014      86                                                        1126    1.14   -0.04  1.0000
   6 -10  -6       8      15                                                          35   -2.00    0.32  1.0000
   6 -10  -6       6      15                                                          29   -2.00    0.32  1.0000
  -6  10   6      17      18                                                          51   -2.00   -0.32  1.0000
  -6  10   6      11      15                                                          41   -2.00   -0.32  1.0000
   7 -10  -7     160      21                                                          73   -2.75    0.01  1.0000
   7 -10  -7     145      19                                                          63   -2.75    0.01  1.0000
  -7  10   7     198      21                                                          99   -2.75   -0.01  1.0000
   8 -10  -8      22      16                                                          37   -0.94   -0.09  1.0000
   8 -10  -8       2      15                                                           7   -0.94   -0.09  1.0000
   9 -10  -9      51      18                                                          34    0.87    0.02  1.0000
  -9  10   9      91      23                                                          68    0.87   -0.02  1.0000
  -9  10   9      51      18                                                          34    0.87   -0.02  1.0000
  10 -10 -10     279      35                                                         199    1.74   -0.03  1.0000
  -8 -11   8      79      23                                                         124    1.51    0.13  1.0000
  -7 -11   7     222      38                                                         358    2.69   -0.01  1.0000
  -6 -11   6      28      14                                                          38   -0.61   -0.09  1.0000
  -5 -11   5    2412     179                                                        2369   -0.30    0.04  1.0000
  -5 -11   5    2602     154                                                        2557   -0.30    0.04  1.0000
  -5 -11   5    2545     154                                                        2501   -0.30    0.04  1.0000
  -4 -11   4       1      10                                                          27   -4.21   -0.13  1.0000
  -4 -11   4      10       9                                                          10   -4.21   -0.13  1.0000
  -4 -11   4       2      10                                                          24   -4.21   -0.13  1.0000
  -3 -11   3     926      46                                                         597   -4.02    0.01  1.0000
  -3 -11   3     933      46                                                         602   -4.02    0.01  1.0000
  -2 -11   2    1117      93                                                        1401    2.68    0.01  1.0000
  -2 -11   2    1120      93                                                        1404    2.68    0.01  1.0000
  -1 -11   1      32       9                                                           2    2.87    0.28  1.0000
   0 -11   0    1082      85                                                        1241    1.57   -0.12  1.0000
   1 -11  -1      58      24                                                         213    4.69    0.05  1.0000
  -1  11   1      35      29                                                         167    4.69   -0.05  1.0000
  -1  11   1      41      22                                                         179    4.69   -0.05  1.0000
  -1  11   1      33      24                                                         162    4.69   -0.05  1.0000
   2 -11  -2    3736     228                                                        3060   -3.88   -0.15  1.0000
   2 -11  -2    3660     196                                                        2992   -3.88   -0.15  1.0000
  -2  11   2    3741     181                                                        3065   -3.88    0.15  1.0000
  -2  11   2    4017     198                                                        3315   -3.88    0.15  1.0000
  -2  11   2    3901     199                                                        3210   -3.88    0.15  1.0000
  -2  11   2    3915     215                                                        3223   -3.88    0.15  1.0000
   3 -11  -3    2009     191                                                        2495   -3.43    0.04  1.0000
  -3  11   3    2133     181                                                        2632   -3.43   -0.04  1.0000
  -3  11   3    2017     152                                                        2503   -3.43   -0.04  1.0000
  -3  11   3    2169     167                                                        2672   -3.43   -0.04  1.0000
  -4  11   4      60      27                                                         129   -2.43   -0.12  1.0000
  -4  11   4      41      21                                                         100   -2.43   -0.12  1.0000
   5 -11  -5       0       9                                                           1    0.29   -0.18  1.0000
  -5  11   5      25      17                                                          30    0.29    0.18  1.0000
  -5  11   5      29      14                                                          34    0.29    0.18  1.0000
   6 -11  -6      68      23                                                         129    2.09   -0.32  1.0000
  -6  11   6      20      21                                                          58    2.09    0.32  1.0000
  -6  11   6      33      18                                                          78    2.09    0.32  1.0000
   7 -11  -7     267      41                                                         373    1.98    0.20  1.0000
   7 -11  -7     316      44                                                         430    1.98    0.20  1.0000
  -7  11   7     295      40                                                         405    1.98   -0.20  1.0000
   8 -11  -8     482      49                                                         507    0.38    0.07  1.0000
   8 -11  -8     443      49                                                         467    0.38    0.07  1.0000
  -8  11   8     356      44                                                         378    0.38   -0.07  1.0000
   9 -11  -9       0      15                                                           1   -0.88    0.00  1.0000
  -9  11   9       9      17                                                          19   -0.88    0.00  1.0000
  -9  11   9       9      17                                                          19   -0.88    0.00  1.0000
  10 -11 -10     122      34                                                         164   -1.17    0.01  1.0000
  -8 -12   8     127      22                                                          90   -1.19   -0.07  1.0000
  -7 -12   7     637      70                                                         800   -2.03    0.04  1.0000
  -6 -12   6      71      14                                                          39    1.48   -0.02  1.0000
  -5 -12   5      33      15                                                          56    1.14   -0.02  1.0000
  -5 -12   5      12      11                                                          27    1.14   -0.02  1.0000
  -5 -12   5      33      14                                                          55    1.14   -0.02  1.0000
  -4 -12   4      10       9                                                           3    3.25    0.10  1.0000
  -4 -12   4       0       9                                                          18    3.25    0.10  1.0000
  -4 -12   4       1      11                                                          32    3.25    0.10  1.0000
  -3 -12   3     758      65                                                         934    2.03   -0.11  1.0000
  -3 -12   3     678      63                                                         845    2.03   -0.11  1.0000
  -2 -12   2     330      24                                                         198   -2.74    0.03  1.0000
  -2 -12   2     407      26                                                         259   -2.74    0.03  1.0000
  -1 -12   1     241      21                                                         141   -2.45   -0.02  1.0000
   0 -12   0     820      73                                                         957   -1.53   -0.01  1.0000
   0  12   0     989      87                                                        1138   -1.53    0.01  1.0000
   1 -12  -1    2128     123                                                        1763   -2.77   -0.14  1.0000
  -1  12   1    2360     117                                                        1974   -2.77    0.14  1.0000
  -1  12   1    2325     140                                                        1942   -2.77    0.14  1.0000
   2 -12  -2     256      47                                                         525    4.63    0.18  1.0000
  -2  12   2     286      58                                                         568    4.63   -0.18  1.0000
  -2  12   2     315      47                                                         609    4.63   -0.18  1.0000
  -3  12   3      16      15                                                          -4    2.66    0.02  1.0000
  -3  12   3       1       9                                                          11    2.66    0.02  1.0000
  -3  12   3       1      10                                                          12    2.66    0.02  1.0000
  -4  12   4      23      11                                                          10    1.10    0.00  1.0000
  -4  12   4       3      13                                                          -9    1.10    0.00  1.0000
  -5  12   5     882      85                                                         988   -1.15   -0.20  1.0000
  -5  12   5     947      74                                                        1056   -1.15   -0.20  1.0000
  -6  12   6     666      72                                                         791   -1.55   -0.16  1.0000
  -6  12   6     645      62                                                         768   -1.55   -0.16  1.0000
  -7  12   7       3      15                                                           5   -1.22    0.29  1.0000
   8 -12  -8     251      36                                                         244   -0.15    0.00  1.0000
  -8  12   8     226      36                                                         219   -0.15    0.00  1.0000
   9 -12  -9      21      16                                                          14    0.57    0.00  1.0000
  -7 -13   7     190      26                                                         145    1.17   -0.03  1.0000
  -6 -13   6     115      27                                                         185   -1.92    0.13  1.0000
  -5 -13   5      25      13                                                          44   -1.07    0.02  1.0000
  -5 -13   5       7      13                                                          18   -1.07    0.02  1.0000
  -4 -13   4     320      46                                                         447   -2.18   -0.01  1.0000
  -4 -13   4     363      41                                                         498   -2.18   -0.01  1.0000
  -4 -13   4     354      41                                                         487   -2.18   -0.01  1.0000
  -3 -13   3     442      35                                                         397   -0.74    0.05  1.0000
  -3 -13   3     411      35                                                         367   -0.74    0.05  1.0000
  -3 -13   3     422      41                                                         378   -0.74    0.05  1.0000
  -2 -13   2      19       7                                                          -1    2.95   -0.10  1.0000
  -1 -13   1     445      32                                                         314    2.27    0.06  1.0000
   0 -13   0     192      28                                                         238    1.04    0.14  1.0000
   0  13   0     203      36                                                         250    1.04   -0.14  1.0000
   1 -13  -1     124      22                                                         163    1.09    0.17  1.0000
  -1  13   1     159      24                                                         203    1.09   -0.17  1.0000
  -1  13   1     169      34                                                         214    1.09   -0.17  1.0000
   2 -13  -2     130      35                                                         342   -4.75   -0.13  1.0000
  -2  13   2     130      35                                                         342   -4.75    0.13  1.0000
  -2  13   2     157      46                                                         385   -4.75    0.13  1.0000
   3 -13  -3      82      12                                                          48   -1.43   -0.11  1.0000
  -3  13   3      86      17                                                          51   -1.43    0.11  1.0000
  -3  13   3      28      17                                                          10   -1.43    0.11  1.0000
   4 -13  -4       2       8                                                           3    0.10   -0.03  1.0000
  -4  13   4       0       9                                                         -14    0.10    0.03  1.0000
  -4  13   4      13      19                                                          14    0.10    0.03  1.0000
  -5  13   5       3      12                                                          -4    1.24    0.03  1.0000
  -5  13   5      41      17                                                          21    1.24    0.03  1.0000
  -6  13   6      21      16                                                          11    0.86    0.14  1.0000
  -6  13   6      36      20                                                          22    0.86    0.14  1.0000
  -7  13   7     303      40                                                         344    0.77   -0.19  1.0000
  -8  13   8       0      14                                                         -11    0.07   -0.01  1.0000
  -6 -14   6     261      42                                                         349    1.69   -0.19  1.0000
  -5 -14   5     164      26                                                         144    0.53   -0.05  1.0000
  -4 -14   4     347      36                                                         287    1.12    0.03  1.0000
  -4 -14   4     364      31                                                         303    1.12    0.03  1.0000
  -4 -14   4     353      31                                                         293    1.12    0.03  1.0000
  -3 -14   3       0       8                                                           0   -0.12    0.11  1.0000
  -3 -14   3       8       9                                                           9   -0.12    0.11  1.0000
  -2 -14   2       1      12                                                          26   -2.82   -0.03  1.0000
  -1 -14   1       8       9                                                          -6   -1.83   -0.25  1.0000
   1  14  -1       0      16                                                           5   -1.83    0.25  1.0000
   0 -14   0      29      13                                                          36   -0.42   -0.13  1.0000
   0  14   0       0      19                                                           0   -0.42    0.13  1.0000
   1 -14  -1       0       8                                                          -5    0.12   -0.16  1.0000
  -1  14   1      24      19                                                          22    0.12    0.16  1.0000
  -1  14   1       0      10                                                          -3    0.12    0.16  1.0000
   2 -14  -2      41       9                                                          -1    4.30    0.12  1.0000
  -2  14   2      10      14                                                          11    4.30   -0.12  1.0000
  -2  14   2       0      20                                                          36    4.30   -0.12  1.0000
   3 -14  -3     237      29                                                         241    0.09    0.19  1.0000
  -3  14   3     275      44                                                         280    0.09   -0.19  1.0000
  -3  14   3     266      33                                                         271    0.09   -0.19  1.0000
   4 -14  -4      14      10                                                           8   -0.62   -0.09  1.0000
  -4  14   4      35      15                                                          25   -0.62    0.09  1.0000
  -4  14   4      24      22                                                          16   -0.62    0.09  1.0000
   5 -14  -5     173      29                                                         210   -0.91   -0.05  1.0000
  -5  14   5     136      37                                                         169   -0.91    0.05  1.0000
  -5  14   5     195      33                                                         235   -0.91    0.05  1.0000
   6 -14  -6      74      22                                                          89   -0.57    0.26  1.0000
  -6  14   6     115      35                                                         134   -0.57   -0.26  1.0000
  -6  14   6     121      31                                                         141   -0.57   -0.26  1.0000
   7 -14  -7     109      25                                                          95   -0.45   -0.11  1.0000
  -7  14   7     120      30                                                         106   -0.45    0.11  1.0000
  -5 -15   5     178      32                                                         178    0.01    0.01  1.0000
  -4 -15   4      46      18                                                          40   -0.29   -0.11  1.0000
  -4 -15   4      84      18                                                          76   -0.29   -0.11  1.0000
  -3 -15   3     162      23                                                         148    0.38   -0.12  1.0000
  -3 -15   3     147      25                                                         134    0.38   -0.12  1.0000
  -2 -15   2     123      20                                                          60    2.24    0.25  1.0000
  -2 -15   2     110      16                                                          51    2.24    0.25  1.0000
  -1 -15   1      10      12                                                          20    1.30    0.29  1.0000
   1  15  -1       4      19                                                          -2    1.30   -0.29  1.0000
   0 -15   0     212      28                                                         204   -0.18    0.02  1.0000
   0  15   0     242      28                                                         234   -0.18   -0.02  1.0000
   0  15   0     239      43                                                         231   -0.18   -0.02  1.0000
   1 -15  -1     578      58                                                         635   -0.77    0.10  1.0000
  -1  15   1     653      56                                                         713   -0.77   -0.10  1.0000
  -1  15   1     687      74                                                         749   -0.77   -0.10  1.0000
   2 -15  -2       0      15                                                          29   -3.26   -0.11  1.0000
  -2  15   2       1      24                                                          34   -3.26    0.11  1.0000
  -2  15   2       2      17                                                          38   -3.26    0.11  1.0000
   3 -15  -3       1       9                                                          -4    0.76   -0.13  1.0000
  -3  15   3      20      24                                                          31    0.76    0.13  1.0000
  -3  15   3       1      13                                                          -9    0.76    0.13  1.0000
   4 -15  -4      31      15                                                          24    0.47    0.13  1.0000
  -4  15   4       1      12                                                          -6    0.47   -0.13  1.0000
  -4  15   4       4      24                                                           2    0.47   -0.13  1.0000
   5 -15  -5       1      13                                                          -9    0.78   -0.04  1.0000
  -5  15   5       5      23                                                           1    0.78    0.04  1.0000
  -5  15   5       8      14                                                           3    0.78    0.04  1.0000
   6 -15  -6     384      47                                                         413    0.47   -0.26  1.0000
  -6  15   6     435      50                                                         465    0.47    0.26  1.0000
  -6  15   6     413      57                                                         443    0.47    0.26  1.0000
  -7  15   7      37      22                                                          35    0.10   -0.08  1.0000
  -4 -16   4      14      19                                                          14   -0.02    0.10  1.0000
  -4 -16   4       2      10                                                           2   -0.02    0.10  1.0000
  -3 -16   3      11      17                                                          14   -0.31    0.00  1.0000
  -3 -16   3      32      16                                                          37   -0.31    0.00  1.0000
   3  16  -3      33      15                                                          38   -0.31    0.00  1.0000
  -2 -16   2       6      11                                                         -11   -1.59   -0.28  1.0000
  -2 -16   2       6      12                                                          -7   -1.59   -0.28  1.0000
   2  16  -2       8      15                                                          23   -1.59    0.28  1.0000
   2  16  -2       6      27                                                          19   -1.59    0.28  1.0000
  -1 -16   1     113      23                                                          93   -0.67   -0.17  1.0000
  -1 -16   1     108      21                                                          88   -0.67   -0.17  1.0000
   1  16  -1     156      39                                                         132   -0.67    0.17  1.0000
   1  16  -1     183      27                                                         157   -0.67    0.17  1.0000
   0 -16   0     139      27                                                         163    0.65    0.04  1.0000
   0  16   0     109      36                                                         130    0.65   -0.04  1.0000
   0  16   0     161      27                                                         187    0.65   -0.04  1.0000
   1 -16  -1      61      22                                                          78    0.67   -0.07  1.0000
  -1  16   1      46      21                                                          61    0.67    0.07  1.0000
  -1  16   1     117      37                                                         140    0.67    0.07  1.0000
   2 -16  -2     113      30                                                         186    2.00    0.04  1.0000
  -2  16   2     122      42                                                         197    2.00   -0.04  1.0000
  -2  16   2     119      31                                                         193    2.00   -0.04  1.0000
   3 -16  -3       5      14                                                           1   -0.89    0.07  1.0000
  -3  16   3       2      23                                                         -11   -0.89   -0.07  1.0000
  -3  16   3       2      14                                                         -19   -0.89   -0.07  1.0000
   4 -16  -4      26      15                                                          30   -0.24   -0.02  1.0000
  -4  16   4      30      32                                                          34   -0.24    0.02  1.0000
  -4  16   4      16      18                                                          19   -0.24    0.02  1.0000
  -5  16   5       1      17                                                         -13   -0.79   -0.05  1.0000
  -5  16   5      22      28                                                          34   -0.79   -0.05  1.0000
  -3 -17   3      56      17                                                          49    0.32    0.06  1.0000
  -2 -17   2     456      41                                                         398    0.93    0.14  1.0000
  -1 -17   1       7      14                                                           8    0.07    0.05  1.0000
  -1 -17   1       3      15                                                           3    0.07    0.05  1.0000
   1  17  -1       4      27                                                           4    0.07   -0.05  1.0000
   1  17  -1       0      17                                                         -10    0.07   -0.05  1.0000
   0 -17   0      88      26                                                         108   -0.68   -0.02  1.0000
   0 -17   0     111      30                                                         133   -0.68   -0.02  1.0000
   0  17   0      77      27                                                          96   -0.68    0.02  1.0000
   0  17   0      67      35                                                          85   -0.68    0.02  1.0000
   1 -17  -1       0      15                                                          -1   -0.17    0.05  1.0000
  -1  17   1       0      17                                                           0   -0.17   -0.05  1.0000
  -1  17   1      12      29                                                          14   -0.17   -0.05  1.0000
   2 -17  -2     193      29                                                         154   -0.99   -0.01  1.0000
  -2  17   2     269      32                                                         223   -0.99    0.01  1.0000
  -2  17   2     218      47                                                         176   -0.99    0.01  1.0000
  -3  17   3       1      23                                                         -22    0.69    0.08  1.0000
  -2 -17   1      17      18                                                          23   -0.45   -0.08  1.0000
  -5  16   6       0      25                                                         -24    0.36   -0.03  1.0000
  -4  16   5     213      34                                                         236    0.51    0.03  1.0000
  -4  16   5     131      45                                                         149    0.51    0.03  1.0000
  -3  16   4      31      28                                                          11    1.48    0.09  1.0000
  -3  16   4      70      21                                                          38    1.48    0.09  1.0000
   3 -16  -4      24      13                                                           7    1.48   -0.09  1.0000
  -2  16   3     139      28                                                         101   -1.16    0.04  1.0000
  -2  16   3     152      37                                                         112   -1.16    0.04  1.0000
   2 -16  -3     171      27                                                         129   -1.16   -0.04  1.0000
  -1  16   2     141      29                                                         159   -0.49    0.01  1.0000
  -1  16   2     136      42                                                         154   -0.49    0.01  1.0000
   1 -16  -2     125      28                                                         142   -0.49   -0.01  1.0000
   0  16   1       3      26                                                         -16   -1.13    0.04  1.0000
   0  16   1       9      19                                                          22   -1.13    0.04  1.0000
   0 -16  -1       0      13                                                           2   -1.13   -0.04  1.0000
   1  16   0     152      42                                                         158   -0.16   -0.13  1.0000
   1  16   0     125      27                                                         130   -0.16   -0.13  1.0000
  -1 -16   0     113      27                                                         118   -0.16    0.13  1.0000
  -1 -16   0     164      28                                                         170   -0.16    0.13  1.0000
   2  16  -1       3      25                                                         -15    1.11   -0.18  1.0000
   2  16  -1       3      17                                                          -2    1.11   -0.18  1.0000
  -2 -16   1       3      13                                                          -8    1.11    0.18  1.0000
  -2 -16   1       3      13                                                          11    1.11    0.18  1.0000
   3  16  -2      63      21                                                          53    0.44    0.02  1.0000
  -3 -16   2      53      20                                                          44    0.44   -0.02  1.0000
  -3 -16   2      73      20                                                          62    0.44   -0.02  1.0000
  -4 -16   3     106      23                                                          98    0.27   -0.10  1.0000
  -6  15   7       0      20                                                          -2    0.33   -0.21  1.0000
  -5  15   6     119      28                                                         105   -0.43   -0.05  1.0000
  -5  15   6     146      38                                                         131   -0.43   -0.05  1.0000
   5 -15  -6     114      25                                                         101   -0.43    0.05  1.0000
  -4  15   5     102      27                                                         135   -1.02    0.05  1.0000
  -4  15   5      78      36                                                         107   -1.02    0.05  1.0000
   4 -15  -5     105      28                                                         139   -1.02   -0.05  1.0000
  -3  15   4      56      18                                                          22   -1.88   -0.12  1.0000
  -3  15   4      45      28                                                          15   -1.88   -0.12  1.0000
   3 -15  -4      55      13                                                          21   -1.88    0.12  1.0000
  -2  15   3     146      22                                                          76    2.24   -0.11  1.0000
  -2  15   3     106      27                                                          48    2.24   -0.11  1.0000
   2 -15  -3      97      17                                                          42    2.24    0.11  1.0000
  -1  15   2      82      27                                                          55    1.09    0.05  1.0000
  -1  15   2      83      21                                                          56    1.09    0.05  1.0000
   1 -15  -2      91      17                                                          63    1.09   -0.05  1.0000
   0  15   1     385      37                                                         311    1.32    0.03  1.0000
   0  15   1     421      51                                                         344    1.32    0.03  1.0000
   0 -15  -1     347      35                                                         277    1.32   -0.03  1.0000
   1  15   0     631      51                                                         609   -0.30    0.22  1.0000
   1  15   0     629      65                                                         607   -0.30    0.22  1.0000
  -1 -15   0     540      50                                                         520   -0.30   -0.22  1.0000
   2  15  -1      52      22                                                          97   -1.78    0.20  1.0000
  -2 -15   1      69      25                                                         120   -1.78   -0.20  1.0000
  -2 -15   1      57      22                                                         104   -1.78   -0.20  1.0000
   3  15  -2      10      13                                                           6   -0.58   -0.13  1.0000
  -3 -15   2       5      12                                                           2   -0.58    0.13  1.0000
  -3 -15   2       1      11                                                          -2   -0.58    0.13  1.0000
   4  15  -3      27      15                                                          20   -0.51   -0.13  1.0000
  -4 -15   3      17      16                                                          11   -0.51    0.13  1.0000
  -4 -15   3      57      16                                                          46   -0.51    0.13  1.0000
  -5 -15   4      16      16                                                          11   -0.45   -0.02  1.0000
  -7  14   8      43      23                                                          41   -0.13   -0.13  1.0000
  -6  14   7     419      46                                                         395   -0.41    0.35  1.0000
   6 -14  -7     486      48                                                         460   -0.41   -0.35  1.0000
  -5  14   6     189      31                                                         162    0.68    0.01  1.0000
  -5  14   6     234      40                                                         204    0.68    0.01  1.0000
   5 -14  -6     187      26                                                         160    0.68   -0.01  1.0000
  -4  14   5      82      25                                                         137    1.77   -0.08  1.0000
  -4  14   5      74      34                                                         127    1.77   -0.08  1.0000
   4 -14  -5      70      23                                                         121    1.77    0.08  1.0000
  -3  14   4      13      25                                                          36    1.59    0.20  1.0000
  -3  14   4       0      14                                                           9    1.59    0.20  1.0000
   3 -14  -4       1      11                                                          13    1.59   -0.20  1.0000
  -2  14   3     768      60                                                         500   -3.59    0.12  1.0000
  -2  14   3     741      46                                                         478   -3.59    0.12  1.0000
   2 -14  -3     783      47                                                         512   -3.59   -0.12  1.0000
  -1  14   2     300      37                                                         364   -1.17   -0.16  1.0000
  -1  14   2     223      45                                                         278   -1.17   -0.16  1.0000
   1 -14  -2     240      35                                                         297   -1.17    0.16  1.0000
   0  14   1     239      39                                                         189   -1.13   -0.10  1.0000
   0  14   1     194      23                                                         150   -1.13   -0.10  1.0000
   0 -14  -1     199      25                                                         154   -1.13    0.10  1.0000
  -1 -14   0      68      15                                                          50    0.81    0.20  1.0000
  -2 -14   1     108      27                                                         201    2.53    0.08  1.0000
  -3 -14   2      18      14                                                          31    0.85   -0.14  1.0000
  -3 -14   2      10      13                                                          20    0.85   -0.14  1.0000
  -4 -14   3      40      16                                                          46    0.30   -0.05  1.0000
  -4 -14   3      28      15                                                          33    0.30   -0.05  1.0000
  -4 -14   3      28      13                                                          33    0.30   -0.05  1.0000
  -5 -14   4     230      33                                                         227    0.07    0.10  1.0000
  -5 -14   4     199      27                                                         196    0.07    0.10  1.0000
  -6 -14   5       3      15                                                           8   -1.93    0.28  1.0000
  -7  13   8     225      36                                                         233    0.17    0.15  1.0000
  -7  13   8     186      34                                                         193    0.17    0.15  1.0000
  -6  13   7      71      21                                                          65    0.26   -0.31  1.0000
  -5  13   6      37      25                                                          68   -1.45   -0.01  1.0000
  -5  13   6      28      20                                                          56   -1.45   -0.01  1.0000
  -4  13   5     156      33                                                         244   -2.10   -0.05  1.0000
  -4  13   5     156      40                                                         244   -2.10   -0.05  1.0000
   4 -13  -5     164      30                                                         254   -2.10    0.05  1.0000
  -3  13   4     753      75                                                         726   -0.33   -0.17  1.0000
  -3  13   4     925      65                                                         895   -0.33   -0.17  1.0000
   3 -13  -4     855      66                                                         826   -0.33    0.17  1.0000
  -2  13   3     539      32                                                         267    4.60   -0.03  1.0000
  -2  13   3     533      42                                                         263    4.60   -0.03  1.0000
   2 -13  -3     532      30                                                         262    4.60    0.03  1.0000
  -1  13   2      18      13                                                          26    0.56    0.22  1.0000
  -1  13   2       1      19                                                          -2    0.56    0.22  1.0000
   1 -13  -2      13      10                                                          20    0.56   -0.22  1.0000
   0  13   1      11      17                                                          21    0.81    0.10  1.0000
   0 -13  -1       1       8                                                          -8    0.81   -0.10  1.0000
  -1 -13   0     105      17                                                          68   -1.35   -0.07  1.0000
  -2 -13   1      88      26                                                         201   -3.20    0.03  1.0000
  -3 -13   2     201      23                                                         171   -0.74   -0.02  1.0000
  -3 -13   2     207      23                                                         176   -0.74   -0.02  1.0000
  -4 -13   3      98      18                                                         111    0.44   -0.03  1.0000
  -4 -13   3     117      21                                                         132    0.44   -0.03  1.0000
  -4 -13   3     101      22                                                         115    0.44   -0.03  1.0000
  -5 -13   4     129      21                                                         109    0.61   -0.10  1.0000
  -5 -13   4     152      21                                                         130    0.61   -0.10  1.0000
  -5 -13   4     119      20                                                         100    0.61   -0.10  1.0000
  -6 -13   5       4      17                                                          37    2.71   -0.26  1.0000
  -7 -13   6      43      18                                                          36   -0.36    0.03  1.0000
   9 -12 -10       0      14                                                           1   -0.45   -0.02  1.0000
  -8  12   9       0      16                                                          -2   -0.45    0.02  1.0000
  -8  12   9       1      16                                                           2   -0.45    0.02  1.0000
  -7  12   8     159      28                                                         156   -0.07   -0.24  1.0000
  -7  12   8     179      30                                                         176   -0.07   -0.24  1.0000
  -6  12   7      29      15                                                          21    0.55    0.23  1.0000
  -5  12   6    1468     100                                                        1220    2.26    0.18  1.0000
  -5  12   6    1452      85                                                        1206    2.26    0.18  1.0000
  -4  12   5     187      39                                                         251    1.45    0.11  1.0000
  -4  12   5     295      36                                                         374    1.45    0.11  1.0000
  -3  12   4     304      45                                                         377   -1.32   -0.02  1.0000
  -3  12   4     259      35                                                         326   -1.32   -0.02  1.0000
  -2  12   3     389      22                                                         146   -5.10    0.02  1.0000
  -2  12   3     288      28                                                          87   -5.10    0.02  1.0000
   2 -12  -3     384      19                                                         143   -5.10   -0.02  1.0000
  -1  12   2     177      35                                                         197    0.49   -0.16  1.0000
  -1  12   2     191      26                                                         212    0.49   -0.16  1.0000
   1 -12  -2     217      27                                                         239    0.49    0.16  1.0000
   0  12   1       4      15                                                           7   -0.37   -0.03  1.0000
   0  12   1       7       9                                                          10   -0.37   -0.03  1.0000
   0 -12  -1      14       9                                                          18   -0.37    0.03  1.0000
  -1 -12   0     743      50                                                         597    1.89    0.01  1.0000
  -2 -12   1     154      14                                                          50    3.58   -0.01  1.0000
  -2 -12   1     177      15                                                          63    3.58   -0.01  1.0000
  -3 -12   2     184      23                                                         191    0.18    0.16  1.0000
  -3 -12   2     164      23                                                         171    0.18    0.16  1.0000
  -4 -12   3      21       8                                                           6   -1.46   -0.03  1.0000
  -4 -12   3      10       8                                                           1   -1.46   -0.03  1.0000
  -4 -12   3      15       9                                                           3   -1.46   -0.03  1.0000
  -5 -12   4      34      14                                                          60   -1.28    0.07  1.0000
  -5 -12   4      45      16                                                          75   -1.28    0.07  1.0000
  -5 -12   4      17      14                                                          36   -1.28    0.07  1.0000
  -6 -12   5     304      21                                                         168   -3.01    0.18  1.0000
  -6 -12   5     214      22                                                         103   -3.01    0.18  1.0000
  -7 -12   6    1294      97                                                        1189    1.00   -0.05  1.0000
  -8 -12   7      33      20                                                          52    0.99    0.07  1.0000
   9 -11 -10      92      23                                                          67    0.95    0.04  1.0000
  -8  11   9       1      12                                                          -3    0.70   -0.02  1.0000
   8 -11  -9      31      20                                                          44    0.70    0.02  1.0000
   8 -11  -9      25      17                                                          37    0.70    0.02  1.0000
  -7  11   8    1112      80                                                        1063   -0.50    0.28  1.0000
   7 -11  -8    1276      91                                                        1223   -0.50   -0.28  1.0000
   7 -11  -8    1118      89                                                        1069   -0.50   -0.28  1.0000
  -6  11   7     375      43                                                         480   -1.69   -0.32  1.0000
   6 -11  -7     334      45                                                         434   -1.69    0.32  1.0000
  -5  11   6     575      47                                                         416   -2.40   -0.28  1.0000
  -5  11   6     528      38                                                         376   -2.40   -0.28  1.0000
   5 -11  -6     598      43                                                         435   -2.40    0.28  1.0000
  -4  11   5     287      42                                                         298   -0.21    0.02  1.0000
  -4  11   5     361      36                                                         373   -0.21    0.02  1.0000
  -3  11   4     942      66                                                         698    2.86    0.13  1.0000
  -3  11   4     957      54                                                         711    2.86    0.13  1.0000
  -2  11   3     232      23                                                          56    5.31   -0.07  1.0000
   2 -11  -3     355      18                                                         124    5.31    0.07  1.0000
  -1  11   2       2      15                                                           4   -1.88    0.07  1.0000
  -1  11   2       4      13                                                          17   -1.88    0.07  1.0000
  -1  11   2       8       7                                                         -14   -1.88    0.07  1.0000
   1 -11  -2       1       9                                                           6   -1.88   -0.07  1.0000
   0  11   1      96      17                                                          96    0.00   -0.06  1.0000
   0 -11  -1     103      18                                                         103    0.00    0.06  1.0000
  -1 -11   0    1794     133                                                        2135   -2.57   -0.17  1.0000
  -1 -11   0    1630     131                                                        1956   -2.57   -0.17  1.0000
  -2 -11   1     585      68                                                         920   -4.12   -0.01  1.0000
  -2 -11   1     633      69                                                         980   -4.12   -0.01  1.0000
  -3 -11   2    1234      91                                                        1339    0.98   -0.09  1.0000
  -3 -11   2    1254      91                                                        1360    0.98   -0.09  1.0000
  -4 -11   3     629      37                                                         436    2.81    0.08  1.0000
  -4 -11   3     634      38                                                         440    2.81    0.08  1.0000
  -5 -11   4    2544     171                                                        2784    1.56   -0.11  1.0000
  -5 -11   4    2392     199                                                        2625    1.56   -0.11  1.0000
  -5 -11   4    2607     172                                                        2850    1.56   -0.11  1.0000
  -6 -11   5     410      26                                                         263    2.70   -0.03  1.0000
  -6 -11   5     345      28                                                         211    2.70   -0.03  1.0000
  -6 -11   5     345      25                                                         211    2.70   -0.03  1.0000
  -7 -11   6       0      12                                                           5   -1.72    0.06  1.0000
  -8 -11   7     837      83                                                         985   -1.64   -0.14  1.0000
  10 -10 -11       6      18                                                          18   -1.22   -0.01  1.0000
  -9  10  10     443      55                                                         532   -1.35    0.02  1.0000
  -9  10  10     324      49                                                         400   -1.35    0.02  1.0000
   9 -10 -10     438      54                                                         526   -1.35   -0.02  1.0000
   9 -10 -10     499      57                                                         593   -1.35   -0.02  1.0000
  -8  10   9     102      20                                                          85   -0.60    0.01  1.0000
  -8  10   9      97      20                                                          80   -0.60    0.01  1.0000
   8 -10  -9     120      25                                                         101   -0.60   -0.01  1.0000
   8 -10  -9     101      22                                                          84   -0.60   -0.01  1.0000
  -7  10   8      65      15                                                          36    1.37   -0.11  1.0000
   7 -10  -8      43      15                                                          20    1.37    0.11  1.0000
   7 -10  -8     120      20                                                          79    1.37    0.11  1.0000
  -6  10   7       4      13                                                          20    2.52    0.39  1.0000
   6 -10  -7      14       9                                                           0    2.52   -0.39  1.0000
   6 -10  -7       3      13                                                          10    2.52   -0.39  1.0000
  -5  10   6       8      14                                                          32    1.88    0.14  1.0000
  -5  10   6       4      16                                                          24    1.88    0.14  1.0000
   5 -10  -6      11      14                                                          38    1.88   -0.14  1.0000
   5 -10  -6      19      16                                                          51    1.88   -0.14  1.0000
  -4  10   5       7      12                                                          19   -1.10   -0.10  1.0000
  -4  10   5       1      15                                                           7   -1.10   -0.10  1.0000
   4 -10  -5      16      14                                                          32   -1.10    0.10  1.0000
   4 -10  -5      10      12                                                          23   -1.10    0.10  1.0000
  -3  10   4     395      55                                                         680   -4.15   -0.12  1.0000
  -3  10   4     509      70                                                         828   -4.15   -0.12  1.0000
   3 -10  -4     458      70                                                         762   -4.15    0.12  1.0000
   3 -10  -4     516      63                                                         837   -4.15    0.12  1.0000
  -2  10   3    2194     102                                                        1531   -5.16    0.01  1.0000
  -2  10   3    2215     103                                                        1549   -5.16    0.01  1.0000
  -2  10   3    2053     111                                                        1414   -5.16    0.01  1.0000
  -2  10   3    2226      95                                                        1558   -5.16    0.01  1.0000
   2 -10  -3    2027     117                                                        1392   -5.16   -0.01  1.0000
  -1  10   2      48      23                                                         146    3.44    0.03  1.0000
  -1  10   2      51      29                                                         151    3.44    0.03  1.0000
  -1  10   2      82      23                                                         201    3.44    0.03  1.0000
  -1  10   2      60      23                                                         166    3.44    0.03  1.0000
   1 -10  -2      75      23                                                         190    3.44   -0.03  1.0000
   1 -10  -2      72      26                                                         185    3.44   -0.03  1.0000
   0  10   1     618      45                                                         641    0.31    0.08  1.0000
   0  10   1     550      47                                                         572    0.31    0.08  1.0000
   0 -10  -1     525      46                                                         547    0.31   -0.08  1.0000
   0 -10  -1     585      55                                                         608    0.31   -0.08  1.0000
  -1 -10   0    2592     131                                                        2005    4.11    0.42  1.0000
  -1 -10   0    2679     131                                                        2081    4.11    0.42  1.0000
  -2 -10   1    3104     235                                                        3951    4.78   -0.18  1.0000
  -2 -10   1    2926     233                                                        3750    4.78   -0.18  1.0000
  -3 -10   2    2943     213                                                        3519   -3.40    0.02  1.0000
  -3 -10   2    2858     212                                                        3427   -3.40    0.02  1.0000
  -4 -10   3     872      42                                                         539   -4.23    0.04  1.0000
  -4 -10   3     844      42                                                         517   -4.23    0.04  1.0000
  -5 -10   4       2       9                                                           8   -0.97    0.10  1.0000
  -5 -10   4      21      11                                                          36   -0.97    0.10  1.0000
  -5 -10   4       3       9                                                          11   -0.97    0.10  1.0000
  -6 -10   5     143      28                                                         223   -1.98   -0.10  1.0000
  -6 -10   5     173      25                                                         260   -1.98   -0.10  1.0000
  -6 -10   5     166      26                                                         251   -1.98   -0.10  1.0000
  -7 -10   6     633      37                                                         464    2.43   -0.01  1.0000
  -7 -10   6     578      43                                                         417    2.43   -0.01  1.0000
  -8 -10   7      31      21                                                          75    2.05    0.17  1.0000
  -9 -10   8      11      14                                                          11    0.00   -0.11  1.0000
  10  -9 -11      43      18                                                          16    1.70   -0.05  1.0000
  -9   9  10     130      29                                                         180    1.35   -0.06  1.0000
  -9   9  10     121      28                                                         169    1.35   -0.06  1.0000
   9  -9 -10      63      28                                                          99    1.35    0.06  1.0000
   9  -9 -10     113      29                                                         160    1.35    0.06  1.0000
  -8   9   9     304      39                                                         314    0.18   -0.07  1.0000
   8  -9  -9     360      41                                                         371    0.18    0.07  1.0000
   8  -9  -9     399      43                                                         410    0.18    0.07  1.0000
   7  -9  -8      19      19                                                          58   -2.18    0.04  1.0000
   7  -9  -8      10      16                                                          42   -2.18    0.04  1.0000
  -6   9   7     272      41                                                         432   -2.86   -0.27  1.0000
   6  -9  -7     324      46                                                         496   -2.86    0.27  1.0000
   6  -9  -7     346      47                                                         524   -2.86    0.27  1.0000
  -5   9   6     731      52                                                         659   -0.92   -0.02  1.0000
  -5   9   6     814      62                                                         738   -0.92   -0.02  1.0000
   5  -9  -6     730      56                                                         658   -0.92    0.02  1.0000
   5  -9  -6     805      58                                                         729   -0.92    0.02  1.0000
  -4   9   5    4378     237                                                        3941    2.27    0.05  1.0000
   4  -9  -5    4734     272                                                        4279    2.27   -0.05  1.0000
   4  -9  -5    4890     273                                                        4428    2.27   -0.05  1.0000
  -3   9   4     668      88                                                        1122    5.11    0.18  1.0000
  -3   9   4     729      82                                                        1200    5.11    0.18  1.0000
  -3   9   4     664      73                                                        1117    5.11    0.18  1.0000
   3  -9  -4     698      83                                                        1161    5.11   -0.18  1.0000
   3  -9  -4     674      93                                                        1130    5.11   -0.18  1.0000
   3  -9  -4     620      82                                                        1059    5.11   -0.18  1.0000
  -2   9   3     271      17                                                          91    4.63    0.08  1.0000
  -2   9   3     222      16                                                          64    4.63    0.08  1.0000
  -2   9   3     235      15                                                          71    4.63    0.08  1.0000
  -2   9   3     274      23                                                          93    4.63    0.08  1.0000
   2  -9  -3     298      21                                                         107    4.63   -0.08  1.0000
   2  -9  -3     284      15                                                          99    4.63   -0.08  1.0000
   2  -9  -3     321      19                                                         121    4.63   -0.08  1.0000
   2  -9  -3     237      18                                                          72    4.63   -0.08  1.0000
  -1   9   2    4821     226                                                        3800   -5.21   -0.13  1.0000
  -1   9   2    4839     208                                                        3816   -5.21   -0.13  1.0000
  -1   9   2    4764     227                                                        3749   -5.21   -0.13  1.0000
  -1   9   2    4585     244                                                        3591   -5.21   -0.13  1.0000
   1  -9  -2    4912     227                                                        3881   -5.21    0.13  1.0000
   1  -9  -2    4692     237                                                        3685   -5.21    0.13  1.0000
   1  -9  -2    4344     262                                                        3378   -5.21    0.13  1.0000
   0   9   1     660      52                                                         752   -1.16    0.00  1.0000
   0   9   1     694      57                                                         788   -1.16    0.00  1.0000
   0   9   1     645      56                                                         736   -1.16    0.00  1.0000
   0  -9  -1     651      65                                                         743   -1.16    0.00  1.0000
   0  -9  -1     682      57                                                         776   -1.16    0.00  1.0000
   0  -9  -1     733      57                                                         830   -1.16    0.00  1.0000
   1   9   0    2593     116                                                        1730   -6.25    0.46  1.0000
  -1  -9   0    2496     116                                                        1651   -6.25   -0.46  1.0000
  -1  -9   0    3054     154                                                        2110   -6.25   -0.46  1.0000
  -1  -9   0    2683     117                                                        1804   -6.25   -0.46  1.0000
  -1  -9   0    2731     136                                                        1843   -6.25   -0.46  1.0000
  -2  -9   1     685      74                                                        1075   -4.42    0.41  1.0000
  -2  -9   1     720      74                                                        1118   -4.42    0.41  1.0000
  -2  -9   1     690      97                                                        1081   -4.42    0.41  1.0000
  -3  -9   2       4      19                                                         154    6.94   -0.20  1.0000
  -3  -9   2       0      18                                                         121    6.94   -0.20  1.0000
  -4  -9   3     667      76                                                        1107    4.98   -0.13  1.0000
  -4  -9   3     713      76                                                        1166    4.98   -0.13  1.0000
  -5  -9   4    1495     108                                                        1455   -0.35   -0.01  1.0000
  -5  -9   4    1393      92                                                        1354   -0.35   -0.01  1.0000
  -5  -9   4    1499      93                                                        1459   -0.35   -0.01  1.0000
  -6  -9   5      82      14                                                          54    1.15    0.08  1.0000
  -6  -9   5     108      16                                                          75    1.15    0.08  1.0000
  -6  -9   5      86      13                                                          57    1.15    0.08  1.0000
  -7  -9   6      80      11                                                          20   -3.00   -0.02  1.0000
  -7  -9   6      76       9                                                          18   -3.00   -0.02  1.0000
  -7  -9   6     101      11                                                          31   -3.00   -0.02  1.0000
  -8  -9   7      21      17                                                          57   -2.02   -0.11  1.0000
  -9  -9   8       0      11                                                          -2    0.44    0.08  1.0000
 -10   8  11     151      35                                                         225   -1.83   -0.05  1.0000
 -10   8  11     125      33                                                         194   -1.83   -0.05  1.0000
  10  -8 -11     145      35                                                         218   -1.83    0.05  1.0000
  -9   8  10      33      19                                                          52   -1.00    0.22  1.0000
  -9   8  10      33      18                                                          52   -1.00    0.22  1.0000
   9  -8 -10      39      20                                                          60   -1.00   -0.22  1.0000
   9  -8 -10      34      20                                                          54   -1.00   -0.22  1.0000
  -8   8   9     832      68                                                         860    0.32    0.07  1.0000
   8  -8  -9     708      67                                                         734    0.32   -0.07  1.0000
   8  -8  -9     844      70                                                         872    0.32   -0.07  1.0000
   7  -8  -8     206      20                                                          98    2.99   -0.03  1.0000
   7  -8  -8     232      22                                                         116    2.99   -0.03  1.0000
  -6   8   7    1094      91                                                        1373    2.66    0.13  1.0000
   6  -8  -7    1188     104                                                        1478    2.66   -0.13  1.0000
   6  -8  -7    1151     103                                                        1437    2.66   -0.13  1.0000
  -5   8   6     143      27                                                         158   -0.40    0.04  1.0000
  -5   8   6     169      22                                                         185   -0.40    0.04  1.0000
   5  -8  -6     121      22                                                         135   -0.40   -0.04  1.0000
   5  -8  -6     181      24                                                         198   -0.40   -0.04  1.0000
  -4   8   5     864      54                                                         609   -3.15   -0.06  1.0000
  -4   8   5     810      43                                                         564   -3.15   -0.06  1.0000
   4  -8  -5     802      48                                                         557   -3.15    0.06  1.0000
   4  -8  -5     822      47                                                         574   -3.15    0.06  1.0000
   4  -8  -5     752      52                                                         516   -3.15    0.06  1.0000
  -3   8   4     118      32                                                         388   -5.90   -0.22  1.0000
  -3   8   4     111      35                                                         375   -5.90   -0.22  1.0000
  -3   8   4     114      42                                                         381   -5.90   -0.22  1.0000
  -3   8   4     100      34                                                         354   -5.90   -0.22  1.0000
   3  -8  -4     119      40                                                         390   -5.90    0.22  1.0000
   3  -8  -4     115      35                                                         382   -5.90    0.22  1.0000
   3  -8  -4      80      33                                                         316   -5.90    0.22  1.0000
  -2   8   3    1828      93                                                        1400   -3.57   -0.06  1.0000
  -2   8   3    1641      91                                                        1237   -3.57   -0.06  1.0000
  -2   8   3    1882     102                                                        1447   -3.57   -0.06  1.0000
  -2   8   3    1709      85                                                        1296   -3.57   -0.06  1.0000
   2  -8  -3    1831     107                                                        1402   -3.57    0.06  1.0000
   2  -8  -3    1910      96                                                        1472   -3.57    0.06  1.0000
   2  -8  -3    1748      92                                                        1330   -3.57    0.06  1.0000
   2  -8  -3    1875      96                                                        1441   -3.57    0.06  1.0000
  -1   8   2      17      25                                                         249    7.82    0.12  1.0000
  -1   8   2      14      24                                                         238    7.82    0.12  1.0000
  -1   8   2      18      32                                                         252    7.82    0.12  1.0000
  -1   8   2       5      24                                                         195    7.82    0.12  1.0000
   1  -8  -2      15      29                                                         243    7.82   -0.12  1.0000
   1  -8  -2      15      26                                                         241    7.82   -0.12  1.0000
   1  -8  -2      34      27                                                         305    7.82   -0.12  1.0000
   1  -8  -2      19      26                                                         256    7.82   -0.12  1.0000
   0   8   1    1631     120                                                        1934    2.41   -0.04  1.0000
   0   8   1    1518     109                                                        1811    2.41   -0.04  1.0000
   0   8   1    1453     118                                                        1740    2.41   -0.04  1.0000
   0  -8  -1    1938     156                                                        2267    2.41    0.04  1.0000
   0  -8  -1    1517     119                                                        1810    2.41    0.04  1.0000
   0  -8  -1    1667     119                                                        1974    2.41    0.04  1.0000
   0  -8  -1    1489     138                                                        1779    2.41    0.04  1.0000
   0  -8  -1    1504     123                                                        1796    2.41    0.04  1.0000
   0  -8  -1    1517     123                                                        1810    2.41    0.04  1.0000
   1   8   0       1      18                                                         139    7.41   -0.27  1.0000
   1   8   0       1      17                                                         148    7.41   -0.27  1.0000
   1   8   0       1      19                                                         147    7.41   -0.27  1.0000
  -1  -8   0       1      20                                                         143    7.41    0.27  1.0000
  -1  -8   0       1      24                                                         139    7.41    0.27  1.0000
  -1  -8   0       1      19                                                         148    7.41    0.27  1.0000
  -1  -8   0       0      17                                                         123    7.41    0.27  1.0000
   2   8  -1    1386      72                                                        1129    2.43    0.39  1.0000
  -2  -8   1    1205      83                                                         966    2.43   -0.39  1.0000
  -2  -8   1    1341      72                                                        1088    2.43   -0.39  1.0000
  -2  -8   1    1358      94                                                        1103    2.43   -0.39  1.0000
  -2  -8   1    1360      72                                                        1105    2.43   -0.39  1.0000
  -3  -8   2    2466     298                                                        4282  -10.56    0.50  1.0000
  -3  -8   2    2471     256                                                        4289  -10.56    0.50  1.0000
  -3  -8   2    2480     257                                                        4301  -10.56    0.50  1.0000
  -4  -8   3    2042      91                                                        1441   -4.84    0.04  1.0000
  -4  -8   3    1959      91                                                        1371   -4.84    0.04  1.0000
  -4  -8   3    2039     106                                                        1438   -4.84    0.04  1.0000
  -5  -8   4     146      15                                                          83    1.99   -0.04  1.0000
  -5  -8   4     142      16                                                          80    1.99   -0.04  1.0000
  -5  -8   4     207      17                                                         130    1.99   -0.04  1.0000
  -6  -8   5     945      71                                                         916   -0.31    0.02  1.0000
  -6  -8   5     910      60                                                         882   -0.31    0.02  1.0000
  -6  -8   5     844      60                                                         817   -0.31    0.02  1.0000
  -7  -8   6     281      39                                                         473    3.34   -0.07  1.0000
  -7  -8   6     334      40                                                         541    3.34   -0.07  1.0000
  -7  -8   6     300      46                                                         497    3.34   -0.07  1.0000
  -8  -8   7     305      34                                                         405    1.77    0.07  1.0000
  -8  -8   7     299      40                                                         397    1.77    0.07  1.0000
  -9  -8   8     204      31                                                         238   -0.77    0.02  1.0000
 -10  -8   9      10      13                                                           7   -0.37    0.01  1.0000
 -10   7  11     243      30                                                         175    1.59   -0.04  1.0000
 -10   7  11     289      32                                                         214    1.59   -0.04  1.0000
  10  -7 -11     273      32                                                         200    1.59    0.04  1.0000
  -9   7  10    1183      91                                                        1242    0.57   -0.30  1.0000
  -9   7  10    1070      90                                                        1127    0.57   -0.30  1.0000
   9  -7 -10    1166      95                                                        1225    0.57    0.30  1.0000
   9  -7 -10    1250      96                                                        1311    0.57    0.30  1.0000
  -8   7   9      31      12                                                          16   -1.07    0.02  1.0000
  -8   7   9      47      12                                                          28   -1.07    0.02  1.0000
   8  -7  -9      46      15                                                          27   -1.07   -0.02  1.0000
   8  -7  -9      55      15                                                          34   -1.07   -0.02  1.0000
   7  -7  -8     103      12                                                          20   -3.79   -0.02  1.0000
   7  -7  -8     140      15                                                          38   -3.79   -0.02  1.0000
  -6   7   7      58      12                                                          26   -1.69   -0.10  1.0000
  -6   7   7      23      11                                                           5   -1.69   -0.10  1.0000
   6  -7  -7      57      12                                                          25   -1.69    0.10  1.0000
   6  -7  -7      43      10                                                          16   -1.69    0.10  1.0000
  -5   7   6     834      62                                                         993    1.76   -0.08  1.0000
  -5   7   6     762      71                                                         914    1.76   -0.08  1.0000
  -5   7   6     598      72                                                         734    1.76   -0.08  1.0000
   5  -7  -6     739      67                                                         889    1.76    0.08  1.0000
   5  -7  -6     795      69                                                         951    1.76    0.08  1.0000
  -4   7   5     877      43                                                         568    3.87    0.10  1.0000
  -4   7   5     876      46                                                         567    3.87    0.10  1.0000
  -4   7   5     854      52                                                         549    3.87    0.10  1.0000
   4  -7  -5     836      52                                                         535    3.87   -0.10  1.0000
   4  -7  -5     934      48                                                         614    3.87   -0.10  1.0000
   4  -7  -5     852      45                                                         548    3.87   -0.10  1.0000
   4  -7  -5     930      48                                                         611    3.87   -0.10  1.0000
  -3   7   4    2452     243                                                        3524    6.59    0.11  1.0000
  -3   7   4    2789     260                                                        3926    6.59    0.11  1.0000
  -3   7   4    2572     280                                                        3668    6.59    0.11  1.0000
  -3   7   4    2883     222                                                        4038    6.59    0.11  1.0000
  -3   7   4    3154     244                                                        4357    6.59    0.11  1.0000
   3  -7  -4    2698     255                                                        3818    6.59   -0.11  1.0000
   3  -7  -4    2875     282                                                        4028    6.59   -0.11  1.0000
   3  -7  -4    3240     256                                                        4458    6.59   -0.11  1.0000
   3  -7  -4    3036     244                                                        4219    6.59   -0.11  1.0000
  -2   7   3     254      28                                                         187    1.51    0.06  1.0000
  -2   7   3     272      22                                                         203    1.51    0.06  1.0000
  -2   7   3     241      20                                                         176    1.51    0.06  1.0000
  -2   7   3     290      22                                                         218    1.51    0.06  1.0000
  -2   7   3     264      26                                                         196    1.51    0.06  1.0000
   2  -7  -3     233      23                                                         169    1.51   -0.06  1.0000
   2  -7  -3     232      21                                                         168    1.51   -0.06  1.0000
   2  -7  -3     268      20                                                         199    1.51   -0.06  1.0000
   2  -7  -3     230      22                                                         167    1.51   -0.06  1.0000
  -1   7   2     163      57                                                         872  -11.22   -0.01  1.0000
  -1   7   2     240      73                                                        1042  -11.22   -0.01  1.0000
  -1   7   2     167      69                                                         883  -11.22   -0.01  1.0000
  -1   7   2     111      60                                                         747  -11.22   -0.01  1.0000
  -1   7   2     181      62                                                         914  -11.22   -0.01  1.0000
   1  -7  -2     194      62                                                         942  -11.22    0.01  1.0000
   1  -7  -2     167      63                                                         881  -11.22    0.01  1.0000
   1  -7  -2     114      62                                                         755  -11.22    0.01  1.0000
   1  -7  -2     167      71                                                         881  -11.22    0.01  1.0000
   1  -7  -2     212      81                                                         982  -11.22    0.01  1.0000
   0   7   1     298      33                                                         473   -3.01   -0.08  1.0000
   0   7   1     287      36                                                         460   -3.01   -0.08  1.0000
   0   7   1     285      36                                                         457   -3.01   -0.08  1.0000
   0  -7  -1     260      36                                                         425   -3.01    0.08  1.0000
   0  -7  -1     309      47                                                         487   -3.01    0.08  1.0000
   0  -7  -1     331      37                                                         515   -3.01    0.08  1.0000
   0  -7  -1     252      35                                                         415   -3.01    0.08  1.0000
   0  -7  -1     279      41                                                         450   -3.01    0.08  1.0000
   1   7   0     123       7                                                           1   -6.78    0.11  1.0000
   1   7   0     103       5                                                          -3   -6.78    0.11  1.0000
   1   7   0     181       7                                                          12   -6.78    0.11  1.0000
  -1  -7   0     123       6                                                           1   -6.78   -0.11  1.0000
  -1  -7   0     199       8                                                          17   -6.78   -0.11  1.0000
  -1  -7   0     181       8                                                          12   -6.78   -0.11  1.0000
  -1  -7   0     103       6                                                          -3   -6.78   -0.11  1.0000
  -1  -7   0     151      10                                                           5   -6.78   -0.11  1.0000
   2   7  -1     936      58                                                         854    0.92   -0.11  1.0000
   2   7  -1     946      59                                                         863    0.92   -0.11  1.0000
  -2  -7   1     890      58                                                         810    0.92    0.11  1.0000
  -2  -7   1    1009      68                                                         924    0.92    0.11  1.0000
  -2  -7   1     903      76                                                         822    0.92    0.11  1.0000
  -2  -7   1     955      59                                                         872    0.92    0.11  1.0000
  -3  -7   2    4477     514                                                        7625   13.65   -0.61  1.0000
  -3  -7   2    4357     443                                                        7467   13.65   -0.61  1.0000
  -3  -7   2    4399     442                                                        7523   13.65   -0.61  1.0000
   4   7  -3     206      34                                                         397    3.73   -0.11  1.0000
  -4  -7   3     202      32                                                         392    3.73    0.11  1.0000
  -4  -7   3     212      36                                                         405    3.73    0.11  1.0000
  -4  -7   3     221      33                                                         418    3.73    0.11  1.0000
  -5  -7   4     139      32                                                         312   -3.92    0.02  1.0000
  -5  -7   4     144      28                                                         319   -3.92    0.02  1.0000
  -5  -7   4     162      29                                                         346   -3.92    0.02  1.0000
  -6  -7   5     972      76                                                         997   -0.27   -0.04  1.0000
  -6  -7   5     908      64                                                         932   -0.27   -0.04  1.0000
  -6  -7   5     940      65                                                         965   -0.27   -0.04  1.0000
  -7  -7   6     132      29                                                         274   -3.38    0.16  1.0000
  -7  -7   6     127      25                                                         267   -3.38    0.16  1.0000
  -7  -7   6     115      24                                                         249   -3.38    0.16  1.0000
  -8  -7   7     366      38                                                         464   -1.62   -0.08  1.0000
  -8  -7   7     386      38                                                         487   -1.62   -0.08  1.0000
  -8  -7   7     368      45                                                         467   -1.62   -0.08  1.0000
  -9  -7   8      86      21                                                         120    1.14   -0.06  1.0000
 -10  -7   9      51      20                                                          71    0.87   -0.04  1.0000
 -11   6  12     246      39                                                         302   -1.13   -0.04  1.0000
 -11   6  12     289      42                                                         349   -1.13   -0.04  1.0000
  11  -6 -12     247      41                                                         303   -1.13    0.04  1.0000
 -10   6  11      55      17                                                          31   -1.25    0.08  1.0000
 -10   6  11      24      14                                                           9   -1.25    0.08  1.0000
  10  -6 -11       3      11                                                         -10   -1.25   -0.08  1.0000
  -9   6  10     345      38                                                         346    0.02    0.25  1.0000
  -9   6  10     355      39                                                         356    0.02    0.25  1.0000
   9  -6 -10     390      40                                                         391    0.02   -0.25  1.0000
  -8   6   9    1210      96                                                        1438    2.10   -0.06  1.0000
  -8   6   9    1167      97                                                        1391    2.10   -0.06  1.0000
   8  -6  -9    1076      99                                                        1291    2.10    0.06  1.0000
   8  -6  -9    1093     100                                                        1310    2.10    0.06  1.0000
   7  -6  -8      35      22                                                         144    4.09   -0.01  1.0000
   7  -6  -8      30      22                                                         134    4.09   -0.01  1.0000
   7  -6  -8      18      18                                                         106    4.09   -0.01  1.0000
  -6   6   7    2120     159                                                        2136    0.11    0.13  1.0000
  -6   6   7    2088     126                                                        2104    0.11    0.13  1.0000
   6  -6  -7    1988     144                                                        2004    0.11   -0.13  1.0000
   6  -6  -7    2187     139                                                        2203    0.11   -0.13  1.0000
   6  -6  -7    2217     145                                                        2233    0.11   -0.13  1.0000
  -5   6   6    1439     132                                                        1795   -2.96    0.06  1.0000
  -5   6   6    1491     105                                                        1853   -2.96    0.06  1.0000
  -5   6   6    1382     121                                                        1731   -2.96    0.06  1.0000
   5  -6  -6    1378     119                                                        1726   -2.96   -0.06  1.0000
   5  -6  -6    1318     113                                                        1659   -2.96   -0.06  1.0000
   5  -6  -6    1377     119                                                        1725   -2.96   -0.06  1.0000
  -4   6   5    1984     109                                                        1436   -4.44   -0.09  1.0000
  -4   6   5    2035     102                                                        1480   -4.44   -0.09  1.0000
  -4   6   5    2198      95                                                        1619   -4.44   -0.09  1.0000
  -4   6   5    2279     119                                                        1689   -4.44   -0.09  1.0000
  -4   6   5    2201     103                                                        1622   -4.44   -0.09  1.0000
   4  -6  -5    2180     107                                                        1604   -4.44    0.09  1.0000
   4  -6  -5    2118     119                                                        1551   -4.44    0.09  1.0000
   4  -6  -5    2268     103                                                        1679   -4.44    0.09  1.0000
   4  -6  -5    1962     106                                                        1418   -4.44    0.09  1.0000
  -3   6   4     283      60                                                         722   -6.73    0.04  1.0000
  -3   6   4     259      53                                                         684   -6.73    0.04  1.0000
  -3   6   4     344      55                                                         818   -6.73    0.04  1.0000
  -3   6   4     258      61                                                         682   -6.73    0.04  1.0000
  -3   6   4     298      50                                                         746   -6.73    0.04  1.0000
   3  -6  -4     285      55                                                         726   -6.73   -0.04  1.0000
   3  -6  -4     311      56                                                         766   -6.73   -0.04  1.0000
   3  -6  -4     338      54                                                         809   -6.73   -0.04  1.0000
   3  -6  -4     261      61                                                         687   -6.73   -0.04  1.0000
  -2   6   3     928      67                                                        1056    1.37   -0.18  1.0000
  -2   6   3     926      72                                                        1054    1.37   -0.18  1.0000
  -2   6   3     993      85                                                        1126    1.37   -0.18  1.0000
  -2   6   3    1055      74                                                        1192    1.37   -0.18  1.0000
  -2   6   3     967      80                                                        1098    1.37   -0.18  1.0000
   2  -6  -3     901      94                                                        1028    1.37    0.18  1.0000
   2  -6  -3     910      75                                                        1037    1.37    0.18  1.0000
   2  -6  -3    1005      84                                                        1139    1.37    0.18  1.0000
   2  -6  -3     915      75                                                        1043    1.37    0.18  1.0000
   2  -6  -3     963      73                                                        1094    1.37    0.18  1.0000
  -1   6   2    2733      66                                                         904   14.86    0.01  1.0000
  -1   6   2    2553      56                                                         802   14.86    0.01  1.0000
  -1   6   2    2405      55                                                         720   14.86    0.01  1.0000
  -1   6   2    2497      52                                                         771   14.86    0.01  1.0000
   1  -6  -2    2957      75                                                        1035   14.86   -0.01  1.0000
   1  -6  -2    2533      57                                                         791   14.86   -0.01  1.0000
   1  -6  -2    2418      55                                                         727   14.86   -0.01  1.0000
   1  -6  -2    2566      65                                                         809   14.86   -0.01  1.0000
   1  -6  -2    2560      58                                                         806   14.86   -0.01  1.0000
   0   6   1     629      53                                                         847    2.69    0.29  1.0000
   0   6   1     660      57                                                         883    2.69    0.29  1.0000
   0   6   1     673      58                                                         898    2.69    0.29  1.0000
   0  -6  -1     679      67                                                         905    2.69   -0.29  1.0000
   0  -6  -1     554      57                                                         760    2.69   -0.29  1.0000
   0  -6  -1     688      75                                                         916    2.69   -0.29  1.0000
   0  -6  -1     560      59                                                         767    2.69   -0.29  1.0000
   0  -6  -1     637      58                                                         856    2.69   -0.29  1.0000
   1   6   0    3068     136                                                        2401    4.28   -0.17  1.0000
   1   6   0    2861     135                                                        2218    4.28   -0.17  1.0000
  -1  -6   0    2847     141                                                        2206    4.28    0.17  1.0000
  -1  -6   0    2697     156                                                        2074    4.28    0.17  1.0000
  -1  -6   0    2926     175                                                        2275    4.28    0.17  1.0000
  -1  -6   0    2619     135                                                        2006    4.28    0.17  1.0000
  -1  -6   0    2991     136                                                        2333    4.28    0.17  1.0000
   2   6  -1     759      28                                                         365   -5.65   -0.20  1.0000
   2   6  -1     765      29                                                         369   -5.65   -0.20  1.0000
  -2  -6   1     743      29                                                         354   -5.65    0.20  1.0000
  -2  -6   1     791      33                                                         387   -5.65    0.20  1.0000
  -2  -6   1     717      28                                                         336   -5.65    0.20  1.0000
  -2  -6   1     745      29                                                         355   -5.65    0.20  1.0000
  -2  -6   1     753      38                                                         361   -5.65    0.20  1.0000
  -2  -6   1     781      34                                                         380   -5.65    0.20  1.0000
   3   6  -2     950     193                                                        2946  -15.69   -0.48  1.0000
  -3  -6   2    1047     184                                                        3115  -15.69    0.48  1.0000
  -3  -6   2     960     182                                                        2963  -15.69    0.48  1.0000
  -3  -6   2     949     211                                                        2944  -15.69    0.48  1.0000
  -3  -6   2    1139     213                                                        3273  -15.69    0.48  1.0000
   4   6  -3       5       7                                                          16   -1.21    0.23  1.0000
  -4  -6   3      10       9                                                          25   -1.21   -0.23  1.0000
  -4  -6   3       5       8                                                          16   -1.21   -0.23  1.0000
  -4  -6   3       7       9                                                          19   -1.21   -0.23  1.0000
   5   6  -4    2715     132                                                        1882    5.84    0.04  1.0000
  -5  -6   4    3016     146                                                        2134    5.84   -0.04  1.0000
  -5  -6   4    2915     125                                                        2049    5.84   -0.04  1.0000
  -5  -6   4    2959     126                                                        2086    5.84   -0.04  1.0000
  -6  -6   5     377      35                                                         389    0.20    0.01  1.0000
  -6  -6   5     329      29                                                         340    0.20    0.01  1.0000
  -6  -6   5     343      29                                                         354    0.20    0.01  1.0000
  -7  -6   6    1234      60                                                         912    3.30   -0.18  1.0000
  -7  -6   6    1195      60                                                         878    3.30   -0.18  1.0000
  -7  -6   6    1140      69                                                         831    3.30   -0.18  1.0000
  -8  -6   7     290      22                                                         216    1.56    0.06  1.0000
  -8  -6   7     261      21                                                         191    1.56    0.06  1.0000
  -8  -6   7     257      24                                                         188    1.56    0.06  1.0000
  -9  -6   8      61      11                                                          27   -1.76    0.01  1.0000
  -9  -6   8      52      10                                                          21   -1.76    0.01  1.0000
  -9  -6   8      75      11                                                          36   -1.76    0.01  1.0000
 -10  -6   9      70      16                                                          41   -1.33    0.10  1.0000
 -11  -6  10     178      30                                                         179   -0.04   -0.05  1.0000
 -11   5  12      81      20                                                          50    1.31    0.03  1.0000
 -11   5  12     106      21                                                          70    1.31    0.03  1.0000
  11  -5 -12      92      22                                                          58    1.31   -0.03  1.0000
 -10   5  11      57      21                                                          76    0.77   -0.04  1.0000
 -10   5  11      54      21                                                          72    0.77   -0.04  1.0000
  10  -5 -11      76      23                                                          97    0.77    0.04  1.0000
  -9   5  10     407      37                                                         354   -0.91   -0.17  1.0000
  -9   5  10     449      39                                                         393   -0.91   -0.17  1.0000
   9  -5 -10     380      38                                                         329   -0.91    0.17  1.0000
  -8   5   9     310      45                                                         478   -2.85    0.02  1.0000
  -8   5   9     422      49                                                         616   -2.85    0.02  1.0000
   8  -5  -9     388      50                                                         574   -2.85   -0.02  1.0000
   8  -5  -9     319      47                                                         489   -2.85   -0.02  1.0000
  -7   5   8    4913     256                                                        4167   -3.71   -0.14  1.0000
  -7   5   8    4895     258                                                        4151   -3.71   -0.14  1.0000
   7  -5  -8    4971     271                                                        4221   -3.71    0.14  1.0000
   7  -5  -8    5058     270                                                        4301   -3.71    0.14  1.0000
   7  -5  -8    4825     257                                                        4086   -3.71    0.14  1.0000
  -6   5   7      30       8                                                           9    1.72   -0.19  1.0000
  -6   5   7      44       9                                                          17    1.72   -0.19  1.0000
  -6   5   7      37      10                                                          13    1.72   -0.19  1.0000
  -6   5   7      29      11                                                           8    1.72   -0.19  1.0000
   6  -5  -7      39       9                                                          14    1.72    0.19  1.0000
   6  -5  -7      34       8                                                          11    1.72    0.19  1.0000
   6  -5  -7      34      10                                                          11    1.72    0.19  1.0000
  -5   5   6       7      11                                                          10    3.90    0.03  1.0000
  -5   5   6       3       8                                                          16    3.90    0.03  1.0000
  -4   5   5    3933     266                                                        3152    4.40    0.04  1.0000
  -4   5   5    3664     206                                                        2912    4.40    0.04  1.0000
  -4   5   5    4071     207                                                        3276    4.40    0.04  1.0000
  -4   5   5    4638     242                                                        3786    4.40    0.04  1.0000
  -4   5   5    4311     189                                                        3491    4.40    0.04  1.0000
  -4   5   5    4200     220                                                        3392    4.40    0.04  1.0000
   4  -5  -5    4587     209                                                        3740    4.40   -0.04  1.0000
   4  -5  -5    4438     218                                                        3606    4.40   -0.04  1.0000
   4  -5  -5    4257     218                                                        3443    4.40   -0.04  1.0000
   4  -5  -5    4072     240                                                        3277    4.40   -0.04  1.0000
  -3   5   4    5310     372                                                        6793    6.39   -0.07  1.0000
  -3   5   4    5285     474                                                        6765    6.39   -0.07  1.0000
  -3   5   4    5296     409                                                        6777    6.39   -0.07  1.0000
  -3   5   4    5070     407                                                        6521    6.39   -0.07  1.0000
  -3   5   4    5499     434                                                        7006    6.39   -0.07  1.0000
   3  -5  -4    5831     431                                                        7380    6.39    0.07  1.0000
   3  -5  -4    5445     473                                                        6945    6.39    0.07  1.0000
   3  -5  -4    5276     431                                                        6754    6.39    0.07  1.0000
   3  -5  -4    5737     409                                                        7275    6.39    0.07  1.0000
  -2   5   3    2102     149                                                        2776   -4.58    0.32  1.0000
  -2   5   3    2055     163                                                        2722   -4.58    0.32  1.0000
  -2   5   3    2238     176                                                        2932   -4.58    0.32  1.0000
  -2   5   3    2250     190                                                        2946   -4.58    0.32  1.0000
  -2   5   3    1641     161                                                        2242   -4.58    0.32  1.0000
   2  -5  -3    1950     170                                                        2601   -4.58   -0.32  1.0000
   2  -5  -3    1829     170                                                        2461   -4.58   -0.32  1.0000
   2  -5  -3    1973     188                                                        2627   -4.58   -0.32  1.0000
   2  -5  -3    2098     163                                                        2772   -4.58   -0.32  1.0000
   1  -5  -2    1148      12                                                          28  -19.12    0.25  1.0000
   0   5   1     190      19                                                         233   -0.98   -0.39  1.0000
   0   5   1     169      19                                                         210   -0.98   -0.39  1.0000
   0   5   1     154      17                                                         193   -0.98   -0.39  1.0000
   0  -5  -1     158      19                                                         197   -0.98    0.39  1.0000
   0  -5  -1     128      18                                                         164   -0.98    0.39  1.0000
   0  -5  -1     167      24                                                         208   -0.98    0.39  1.0000
   0  -5  -1     144      21                                                         182   -0.98    0.39  1.0000
   0  -5  -1     141      18                                                         179   -0.98    0.39  1.0000
   1   5   0     143      14                                                         118    0.74    0.46  1.0000
   1   5   0     181      15                                                         153    0.74    0.46  1.0000
  -1  -5   0     132      14                                                         108    0.74   -0.46  1.0000
  -1  -5   0     125      15                                                         102    0.74   -0.46  1.0000
  -1  -5   0     172      15                                                         144    0.74   -0.46  1.0000
  -1  -5   0     169      19                                                         142    0.74   -0.46  1.0000
  -1  -5   0     134      14                                                         110    0.74   -0.46  1.0000
   2   5  -1    7731     318                                                        5092   11.09    0.35  1.0000
  -2  -5   1    7364     317                                                        4795   11.09   -0.35  1.0000
  -2  -5   1    8015     302                                                        5323   11.09   -0.35  1.0000
  -2  -5   1    8159     349                                                        5441   11.09   -0.35  1.0000
  -2  -5   1    7654     349                                                        5030   11.09   -0.35  1.0000
  -2  -5   1    7646     300                                                        5023   11.09   -0.35  1.0000
   3   5  -2      95      79                                                        1096   15.62    0.19  1.0000
  -3  -5   2     118      87                                                        1168   15.62   -0.19  1.0000
  -3  -5   2     155      88                                                        1280   15.62   -0.19  1.0000
  -3  -5   2     143      76                                                        1245   15.62   -0.19  1.0000
  -3  -5   2     126      76                                                        1195   15.62   -0.19  1.0000
   4   5  -3    6967     490                                                        7592   -2.45   -0.27  1.0000
  -4  -5   3    7085     462                                                        7715   -2.45    0.27  1.0000
  -4  -5   3    7831     538                                                        8492   -2.45    0.27  1.0000
  -4  -5   3    7048     464                                                        7676   -2.45    0.27  1.0000
  -4  -5   3    7529     538                                                        8178   -2.45    0.27  1.0000
   5   5  -4     272      10                                                          36   -7.01    0.00  1.0000
  -5  -5   4     260       9                                                          32   -7.01    0.00  1.0000
  -5  -5   4     260      10                                                          32   -7.01    0.00  1.0000
  -5  -5   4     272      11                                                          36   -7.01    0.00  1.0000
  -6  -5   5     105      14                                                          93    0.40    0.01  1.0000
  -6  -5   5      72      14                                                          62    0.40    0.01  1.0000
  -6  -5   5      88      15                                                          77    0.40    0.01  1.0000
  -7  -5   6     143      26                                                         285   -3.30    0.19  1.0000
  -7  -5   6     145      26                                                         288   -3.30    0.19  1.0000
  -7  -5   6     146      29                                                         290   -3.30    0.19  1.0000
  -8  -5   7      23      12                                                          44   -1.24   -0.07  1.0000
  -8  -5   7      17      12                                                          36   -1.24   -0.07  1.0000
  -8  -5   7      26      13                                                          48   -1.24   -0.07  1.0000
  -9  -5   8     787      69                                                        1026    2.66    0.07  1.0000
  -9  -5   8     709      80                                                         937    2.66    0.07  1.0000
  -9  -5   8     758      69                                                         993    2.66    0.07  1.0000
 -10  -5   9     130      19                                                          82    1.58   -0.08  1.0000
 -10  -5   9     139      17                                                          89    1.58   -0.08  1.0000
 -10  -5   9     109      17                                                          65    1.58   -0.08  1.0000
  11   5 -10      12      14                                                          13   -0.10   -0.08  1.0000
 -11  -5  10      17      15                                                          18   -0.10    0.08  1.0000
 -11   4  12     195      34                                                         258   -1.41   -0.03  1.0000
 -11   4  12     209      35                                                         274   -1.41   -0.03  1.0000
  11  -4 -12     154      33                                                         210   -1.41    0.03  1.0000
 -10   4  11      51      18                                                          51    0.01    0.02  1.0000
 -10   4  11      49      17                                                          49    0.01    0.02  1.0000
  10  -4 -11      77      20                                                          77    0.01   -0.02  1.0000
  -9   4  10    2477     153                                                        2225    1.74    0.08  1.0000
  -9   4  10    2607     156                                                        2349    1.74    0.08  1.0000
   9  -4 -10    2882     165                                                        2610    1.74   -0.08  1.0000
  -8   4   9     844      76                                                        1120    2.95    0.04  1.0000
  -8   4   9     680      73                                                         930    2.95    0.04  1.0000
   8  -4  -9     678      77                                                         927    2.95   -0.04  1.0000
   8  -4  -9     873      79                                                        1153    2.95   -0.04  1.0000
  -7   4   8       4      12                                                          38    2.86    0.32  1.0000
  -7   4   8       8      13                                                          50    2.86    0.32  1.0000
  -7   4   8       0      11                                                          21    2.86    0.32  1.0000
   7  -4  -8       7      15                                                          47    2.86   -0.32  1.0000
   7  -4  -8      11      15                                                          57    2.86   -0.32  1.0000
  -6   4   7    1133      63                                                         803   -3.56    0.16  1.0000
  -6   4   7    1006      54                                                         697   -3.56    0.16  1.0000
  -6   4   7     968      54                                                         665   -3.56    0.16  1.0000
  -6   4   7    1071      50                                                         751   -3.56    0.16  1.0000
   6  -4  -7     972      55                                                         668   -3.56   -0.16  1.0000
   6  -4  -7    1112      55                                                         785   -3.56   -0.16  1.0000
   6  -4  -7    1038      56                                                         723   -3.56   -0.16  1.0000
  -5   4   6     115      28                                                         284   -4.09   -0.16  1.0000
  -5   4   6     161      38                                                         354   -4.09   -0.16  1.0000
  -5   4   6     137      28                                                         317   -4.09   -0.16  1.0000
  -5   4   6     155      30                                                         344   -4.09   -0.16  1.0000
  -5   4   6     126      32                                                         300   -4.09   -0.16  1.0000
  -5   4   6     172      33                                                         370   -4.09   -0.16  1.0000
   5  -4  -6     128      28                                                         304   -4.09    0.16  1.0000
   5  -4  -6     144      30                                                         328   -4.09    0.16  1.0000
   5  -4  -6     125      30                                                         299   -4.09    0.16  1.0000
  -4   4   5    3513     244                                                        2873   -3.79    0.02  1.0000
  -4   4   5    4089     212                                                        3396   -3.79    0.02  1.0000
  -4   4   5    4055     193                                                        3365   -3.79    0.02  1.0000
  -4   4   5    4332     274                                                        3618   -3.79    0.02  1.0000
  -4   4   5    4274     225                                                        3565   -3.79    0.02  1.0000
  -4   4   5    4622     214                                                        3883   -3.79    0.02  1.0000
   4  -4  -5    4733     224                                                        3985   -3.79   -0.02  1.0000
   4  -4  -5    4236     223                                                        3530   -3.79   -0.02  1.0000
   4  -4  -5    4240     246                                                        3534   -3.79   -0.02  1.0000
   4  -4  -5    4085     212                                                        3392   -3.79   -0.02  1.0000
  -3   4   4    1914      83                                                        1207   -6.03   -0.04  1.0000
  -3   4   4    2195      91                                                        1432   -6.03   -0.04  1.0000
  -3   4   4    2105      77                                                        1359   -6.03   -0.04  1.0000
  -3   4   4    2241      86                                                        1469   -6.03   -0.04  1.0000
  -3   4   4    1766      96                                                        1090   -6.03   -0.04  1.0000
  -3   4   4    1868     107                                                        1170   -6.03   -0.04  1.0000
   3  -4  -4    2100      88                                                        1355   -6.03    0.04  1.0000
   3  -4  -4    2185      88                                                        1424   -6.03    0.04  1.0000
   3  -4  -4    2012      84                                                        1285   -6.03    0.04  1.0000
   3  -4  -4    2009      97                                                        1282   -6.03    0.04  1.0000
  -2   4   3      37      29                                                         382    8.98   -0.29  1.0000
  -2   4   3      38      27                                                         384    8.98   -0.29  1.0000
  -2   4   3       6      30                                                         250    8.98   -0.29  1.0000
  -2   4   3      34      28                                                         370    8.98   -0.29  1.0000
  -2   4   3      19      32                                                         316    8.98   -0.29  1.0000
   2  -4  -3      37      29                                                         380    8.98    0.29  1.0000
   2  -4  -3      31      32                                                         360    8.98    0.29  1.0000
   2  -4  -3      46      29                                                         409    8.98    0.29  1.0000
   2  -4  -3      18      28                                                         312    8.98    0.29  1.0000
  -1   4   2    4069     515                                                        9936   24.01    0.62  1.0000
  -1   4   2    3185     512                                                        8523   24.01    0.62  1.0000
  -1   4   2    3389     468                                                        8856   24.01    0.62  1.0000
   1  -4  -2    2891     663                                                        8039   24.01   -0.62  1.0000
   1  -4  -2    3697     596                                                        9349   24.01   -0.62  1.0000
   1  -4  -2    3466     543                                                        8979   24.01   -0.62  1.0000
   1  -4  -2    2823     513                                                        7925   24.01   -0.62  1.0000
   0   4   1    1494     117                                                        2022   -4.22    0.21  1.0000
   0   4   1    1621     129                                                        2169   -4.22    0.21  1.0000
   0   4   1    1569     129                                                        2109   -4.22    0.21  1.0000
   0  -4  -1    1510     149                                                        2041   -4.22   -0.21  1.0000
   0  -4  -1    1509     135                                                        2040   -4.22   -0.21  1.0000
   0  -4  -1    1744     167                                                        2311   -4.22   -0.21  1.0000
   0  -4  -1    1606     129                                                        2152   -4.22   -0.21  1.0000
   0  -4  -1    1669     130                                                        2225   -4.22   -0.21  1.0000
   1   4   0    1497     210                                                        2630   -8.41   -0.76  1.0000
  -1  -4   0    1573     170                                                        2731   -8.41    0.76  1.0000
  -1  -4   0    1698     210                                                        2894   -8.41    0.76  1.0000
  -1  -4   0    1510     162                                                        2647   -8.41    0.76  1.0000
  -1  -4   0    1521     161                                                        2662   -8.41    0.76  1.0000
   2   4  -1    1185     219                                                        3265  -15.20   -0.22  1.0000
  -2  -4   1    1441     207                                                        3682  -15.20    0.22  1.0000
  -2  -4   1    1447     241                                                        3691  -15.20    0.22  1.0000
  -2  -4   1    1312     240                                                        3473  -15.20    0.22  1.0000
  -2  -4   1    1289     208                                                        3437  -15.20    0.22  1.0000
   3   4  -2    9058     828                                                       13152  -13.05    0.09  1.0000
  -3  -4   2    9375     909                                                       13533  -13.05   -0.09  1.0000
  -3  -4   2    9395     909                                                       13557  -13.05   -0.09  1.0000
  -3  -4   2    9495     784                                                       13678  -13.05   -0.09  1.0000
  -3  -4   2    9429     781                                                       13598  -13.05   -0.09  1.0000
   4   4  -3     876      33                                                         423    6.05    0.12  1.0000
  -4  -4   3     899      32                                                         439    6.05   -0.12  1.0000
  -4  -4   3     858      38                                                         410    6.05   -0.12  1.0000
  -4  -4   3     972      37                                                         490    6.05   -0.12  1.0000
  -4  -4   3     889      32                                                         432    6.05   -0.12  1.0000
   5   4  -4      71      31                                                         369    7.22   -0.11  1.0000
  -5  -4   4      92      31                                                         416    7.22    0.11  1.0000
  -5  -4   4      88      35                                                         407    7.22    0.11  1.0000
  -5  -4   4      78      30                                                         385    7.22    0.11  1.0000
   6   4  -5     511      37                                                         448   -0.97    0.09  1.0000
  -6  -4   5     495      35                                                         433   -0.97   -0.09  1.0000
  -6  -4   5     515      35                                                         451   -0.97   -0.09  1.0000
  -6  -4   5     562      40                                                         495   -0.97   -0.09  1.0000
  -7  -4   6    1008      52                                                         726    3.21   -0.12  1.0000
  -7  -4   6     992      60                                                         713    3.21   -0.12  1.0000
  -7  -4   6    1093      53                                                         799    3.21   -0.12  1.0000
  -8  -4   7      43      13                                                          51    0.39    0.15  1.0000
  -8  -4   7      46      13                                                          54    0.39    0.15  1.0000
  -8  -4   7      39      12                                                          47    0.39    0.15  1.0000
  -9  -4   8      44      22                                                         144   -3.59   -0.28  1.0000
  -9  -4   8      58      21                                                         168   -3.59   -0.28  1.0000
  -9  -4   8      51      21                                                         157   -3.59   -0.28  1.0000
 -10  -4   9      39      16                                                          72   -1.49   -0.02  1.0000
 -10  -4   9      31      16                                                          61   -1.49   -0.02  1.0000
 -10  -4   9      33      17                                                          63   -1.49   -0.02  1.0000
  11   4 -10     353      39                                                         372    0.34    0.02  1.0000
 -11  -4  10     365      37                                                         385    0.34   -0.02  1.0000
 -11  -4  10     346      43                                                         365    0.34   -0.02  1.0000
 -11   3  12     581      56                                                         667    1.15   -0.02  1.0000
 -11   3  12     610      59                                                         698    1.15   -0.02  1.0000
  11  -3 -12     555      61                                                         639    1.15    0.02  1.0000
 -10   3  11     313      37                                                         361   -0.88   -0.06  1.0000
 -10   3  11     299      37                                                         346   -0.88   -0.06  1.0000
  10  -3 -11     329      39                                                         379   -0.88    0.06  1.0000
  -9   3  10     676      62                                                         844   -2.05   -0.02  1.0000
  -9   3  10     688      63                                                         858   -2.05   -0.02  1.0000
   9  -3 -10     561      63                                                         715   -2.05    0.02  1.0000
  -8   3   9    1037      85                                                        1300   -2.58   -0.13  1.0000
  -8   3   9     994      83                                                        1252   -2.58   -0.13  1.0000
   8  -3  -9     808      85                                                        1042   -2.58    0.13  1.0000
   8  -3  -9     955      87                                                        1208   -2.58    0.13  1.0000
  -7   3   8     393      34                                                         295   -1.77   -0.35  1.0000
  -7   3   8     519      34                                                         406   -1.77   -0.35  1.0000
  -7   3   8     447      33                                                         342   -1.77   -0.35  1.0000
   7  -3  -8     483      34                                                         374   -1.77    0.35  1.0000
   7  -3  -8     460      34                                                         354   -1.77    0.35  1.0000
  -6   3   7      53       9                                                          -3    4.88   -0.03  1.0000
  -6   3   7      40       9                                                          14    4.88   -0.03  1.0000
  -6   3   7      53       7                                                          -1    4.88   -0.03  1.0000
  -6   3   7      53       5                                                          -6    4.88   -0.03  1.0000
  -6   3   7      53       6                                                          -3    4.88   -0.03  1.0000
   6  -3  -7      40       7                                                          11    4.88    0.03  1.0000
   6  -3  -7      53       7                                                          -6    4.88    0.03  1.0000
   6  -3  -7      47       6                                                           1    4.88    0.03  1.0000
  -5   3   6     157      28                                                         318    3.53    0.12  1.0000
  -5   3   6     161      30                                                         323    3.53    0.12  1.0000
  -5   3   6     182      36                                                         352    3.53    0.12  1.0000
  -5   3   6     177      27                                                         346    3.53    0.12  1.0000
  -5   3   6     108      26                                                         246    3.53    0.12  1.0000
  -5   3   6     113      30                                                         254    3.53    0.12  1.0000
   5  -3  -6     166      28                                                         330    3.53   -0.12  1.0000
   5  -3  -6     173      29                                                         340    3.53   -0.12  1.0000
   5  -3  -6     168      29                                                         333    3.53   -0.12  1.0000
  -4   3   5    3116     223                                                        3719    3.46   -0.02  1.0000
  -4   3   5    3381     204                                                        4009    3.46   -0.02  1.0000
  -4   3   5    3215     236                                                        3828    3.46   -0.02  1.0000
  -4   3   5    3171     259                                                        3779    3.46   -0.02  1.0000
  -4   3   5    3021     223                                                        3616    3.46   -0.02  1.0000
  -4   3   5    2877     287                                                        3458    3.46   -0.02  1.0000
   4  -3  -5    3002     223                                                        3595    3.46    0.02  1.0000
   4  -3  -5    3020     258                                                        3615    3.46    0.02  1.0000
   4  -3  -5    3247     236                                                        3862    3.46    0.02  1.0000
  -3   3   4    1231      47                                                         767    4.94    0.16  1.0000
  -3   3   4    1134      50                                                         691    4.94    0.16  1.0000
  -3   3   4    1189      54                                                         734    4.94    0.16  1.0000
  -3   3   4    1219      51                                                         758    4.94    0.16  1.0000
  -3   3   4    1102      58                                                         666    4.94    0.16  1.0000
  -3   3   4    1359      67                                                         869    4.94    0.16  1.0000
   3  -3  -4    1254      53                                                         785    4.94   -0.16  1.0000
   3  -3  -4    1102      50                                                         666    4.94   -0.16  1.0000
   3  -3  -4    1425      60                                                         922    4.94   -0.16  1.0000
   3  -3  -4    1027      51                                                         608    4.94   -0.16  1.0000
  -2   3   3    2504     329                                                        5304  -15.25    0.04  1.0000
  -2   3   3    2535     351                                                        5350  -15.25    0.04  1.0000
  -2   3   3    2507     331                                                        5308  -15.25    0.04  1.0000
  -2   3   3    2156     383                                                        4792  -15.25    0.04  1.0000
  -2   3   3    3095     302                                                        6150  -15.25    0.04  1.0000
   2  -3  -3    2824     383                                                        5766  -15.25   -0.04  1.0000
   2  -3  -3    2951     350                                                        5946  -15.25   -0.04  1.0000
   2  -3  -3    3291     332                                                        6425  -15.25   -0.04  1.0000
  -1   3   2    4171      33                                                         555  -27.45   -0.75  1.0000
  -1   3   2    4077      39                                                         521  -27.45   -0.75  1.0000
  -1   3   2    4138      36                                                         543  -27.45   -0.75  1.0000
  -1   3   2    3963      35                                                         481  -27.45   -0.75  1.0000
   1  -3  -2    4099      41                                                         529  -27.45    0.75  1.0000
   1  -3  -2    3894      35                                                         457  -27.45    0.75  1.0000
   1  -3  -2    4074      37                                                         520  -27.45    0.75  1.0000
   0   3   1     136      12                                                         112   14.87    0.16  1.0000
   0   3   1     154      11                                                          97   14.87    0.16  1.0000
   0   3   1      91      17                                                         162   14.87    0.16  1.0000
   0  -3  -1     115      13                                                         133   14.87   -0.16  1.0000
   0  -3  -1     193      13                                                          70   14.87   -0.16  1.0000
   0  -3  -1     113      16                                                         135   14.87   -0.16  1.0000
   0  -3  -1     135      12                                                         113   14.87   -0.16  1.0000
   0  -3  -1     127      12                                                         121   14.87   -0.16  1.0000
   1   3   0     598     154                                                        2559   17.47    0.73  1.0000
   1   3   0     447     189                                                        2235   17.47    0.73  1.0000
  -1  -3   0     566     153                                                        2491   17.47   -0.73  1.0000
  -1  -3   0     453     146                                                        2247   17.47   -0.73  1.0000
  -1  -3   0     561     189                                                        2482   17.47   -0.73  1.0000
  -1  -3   0     678     146                                                        2721   17.47   -0.73  1.0000
   2   3  -1    5735     616                                                        9891   15.87   -0.03  1.0000
  -2  -3   1    6466     677                                                       10843   15.87    0.03  1.0000
  -2  -3   1    6177     584                                                       10468   15.87    0.03  1.0000
  -2  -3   1    6284     582                                                       10608   15.87    0.03  1.0000
  -2  -3   1    4658     676                                                        8458   15.87    0.03  1.0000
   3   3  -2    5005     442                                                        6928    8.35   -0.08  1.0000
  -3  -3   2    5284     419                                                        7255    8.35    0.08  1.0000
  -3  -3   2    5416     485                                                        7410    8.35    0.08  1.0000
  -3  -3   2    5178     485                                                        7131    8.35    0.08  1.0000
  -3  -3   2    5189     417                                                        7144    8.35    0.08  1.0000
   4   3  -3    3449     340                                                        5106   -8.52    0.12  1.0000
  -4  -3   3    4095     375                                                        5886   -8.52   -0.12  1.0000
  -4  -3   3    4002     374                                                        5775   -8.52   -0.12  1.0000
  -4  -3   3    3650     321                                                        5350   -8.52   -0.12  1.0000
  -4  -3   3    3677     323                                                        5383   -8.52   -0.12  1.0000
   5   3  -4     487      16                                                         146   -6.68    0.11  1.0000
  -5  -3   4     475      19                                                         139   -6.68   -0.11  1.0000
  -5  -3   4     461      16                                                         132   -6.68   -0.11  1.0000
  -5  -3   4     467      16                                                         135   -6.68   -0.11  1.0000
  -5  -3   4     454      17                                                         128   -6.68   -0.11  1.0000
  -5  -3   4     514      21                                                         161   -6.68   -0.11  1.0000
   6   3  -5    1352      86                                                        1218    1.25   -0.13  1.0000
  -6  -3   5    1434      82                                                        1296    1.25    0.13  1.0000
  -6  -3   5    1398      82                                                        1262    1.25    0.13  1.0000
  -6  -3   5    1396      95                                                        1260    1.25    0.13  1.0000
  -6  -3   5    1504     106                                                        1363    1.25    0.13  1.0000
  -7  -3   6       1      12                                                          24   -2.79   -0.07  1.0000
  -7  -3   6       1      10                                                          29   -2.79   -0.07  1.0000
  -7  -3   6       3      10                                                          35   -2.79   -0.07  1.0000
  -8  -3   7     366      34                                                         415    0.84   -0.11  1.0000
  -8  -3   7     328      33                                                         375    0.84   -0.11  1.0000
  -9  -3   8     297      17                                                         121    4.18    0.51  1.0000
  -9  -3   8     203      15                                                          64    4.18    0.51  1.0000
 -10  -3   9      78      19                                                         107    1.03    0.01  1.0000
 -10  -3   9      84      19                                                         114    1.03    0.01  1.0000
 -10  -3   9      97      20                                                         130    1.03    0.01  1.0000
  11   3 -10      36      15                                                          24   -0.74    0.08  1.0000
 -11  -3  10      17      11                                                           9   -0.74   -0.08  1.0000
 -11  -3  10      49      15                                                          35   -0.74   -0.08  1.0000
 -11  -3  10      34      14                                                          22   -0.74   -0.08  1.0000
 -12  -3  11       1      11                                                         -13   -0.52   -0.12  1.0000
 -11   2  12     333      33                                                         302   -0.57    0.09  1.0000
 -11   2  12     297      38                                                         268   -0.57    0.09  1.0000
 -11   2  12     344      35                                                         313   -0.57    0.09  1.0000
  11  -2 -12     301      35                                                         272   -0.57   -0.09  1.0000
 -10   2  11     110      24                                                         160    1.44    0.11  1.0000
 -10   2  11     107      23                                                         156    1.44    0.11  1.0000
  10  -2 -11      81      22                                                         124    1.44   -0.11  1.0000
  -9   2  10       8       9                                                          -3    1.93    0.04  1.0000
  -9   2  10       8       9                                                          -5    1.93    0.04  1.0000
  -8   2   9     233      31                                                         332    1.97    0.10  1.0000
  -8   2   9     219      31                                                         315    1.97    0.10  1.0000
   8  -2  -9     221      31                                                         318    1.97   -0.10  1.0000
  -7   2   8    2205     168                                                        2102    0.74    0.14  1.0000
  -7   2   8    2262     131                                                        2158    0.74    0.14  1.0000
  -7   2   8    1999     129                                                        1901    0.74    0.14  1.0000
   7  -2  -8    2240     137                                                        2136    0.74   -0.14  1.0000
   7  -2  -8    2049     137                                                        1950    0.74   -0.14  1.0000
  -6   2   7     329      16                                                         102   -5.38    0.06  1.0000
  -6   2   7     325      16                                                         100   -5.38    0.06  1.0000
  -6   2   7     334      18                                                         105   -5.38    0.06  1.0000
  -6   2   7     340      19                                                         108   -5.38    0.06  1.0000
   6  -2  -7     296      17                                                          84   -5.38   -0.06  1.0000
   6  -2  -7     329      14                                                         102   -5.38   -0.06  1.0000
   6  -2  -7     329      16                                                         102   -5.38   -0.06  1.0000
  -5   2   6    3099     180                                                        2597   -3.15    0.08  1.0000
  -5   2   6    2524     138                                                        2073   -3.15    0.08  1.0000
  -5   2   6    2864     161                                                        2383   -3.15    0.08  1.0000
  -5   2   6    2536     126                                                        2084   -3.15    0.08  1.0000
  -5   2   6    2503     145                                                        2054   -3.15    0.08  1.0000
   5  -2  -6    2706     139                                                        2239   -3.15   -0.08  1.0000
   5  -2  -6    2775     146                                                        2301   -3.15   -0.08  1.0000
   5  -2  -6    2792     147                                                        2317   -3.15   -0.08  1.0000
  -4   2   5    4785     236                                                        4134   -3.26   -0.11  1.0000
  -4   2   5    4943     275                                                        4281   -3.26   -0.11  1.0000
  -4   2   5    5411     336                                                        4718   -3.26   -0.11  1.0000
  -4   2   5    5214     260                                                        4534   -3.26   -0.11  1.0000
  -4   2   5    4746     301                                                        4098   -3.26   -0.11  1.0000
   4  -2  -5    4864     274                                                        4208   -3.26    0.11  1.0000
   4  -2  -5    5177     261                                                        4499   -3.26    0.11  1.0000
   4  -2  -5    5261     274                                                        4578   -3.26    0.11  1.0000
  -3   2   4    4116     309                                                        4551   -2.21   -0.08  1.0000
  -3   2   4    3996     339                                                        4424   -2.21   -0.08  1.0000
  -3   2   4    5046     292                                                        5526   -2.21   -0.08  1.0000
  -3   2   4    4558     266                                                        5015   -2.21   -0.08  1.0000
  -3   2   4    4347     293                                                        4793   -2.21   -0.08  1.0000
  -3   2   4    4170     377                                                        4607   -2.21   -0.08  1.0000
   3  -2  -4    4383     308                                                        4831   -2.21    0.08  1.0000
   3  -2  -4    4417     338                                                        4867   -2.21    0.08  1.0000
   3  -2  -4    4911     309                                                        5385   -2.21    0.08  1.0000
   3  -2  -4    5159     293                                                        5644   -2.21    0.08  1.0000
  -2   2   3    1824     287                                                        5742   22.12    0.21  1.0000
  -2   2   3    1611     334                                                        5358   22.12    0.21  1.0000
   2  -2  -3    1725     365                                                        5564   22.12   -0.21  1.0000
   2  -2  -3    1349     332                                                        4871   22.12   -0.21  1.0000
   2  -2  -3    1573     315                                                        5289   22.12   -0.21  1.0000
   2  -2  -3    1647     333                                                        5423   22.12   -0.21  1.0000
  -1   2   2    2920      17                                                         190   26.93    0.47  1.0000
  -1   2   2    3019      21                                                         216   26.93    0.47  1.0000
  -1   2   2    2916      16                                                         189   26.93    0.47  1.0000
  -1   2   2    3128      20                                                         246   26.93    0.47  1.0000
  -1   2   2    3034      17                                                         220   26.93    0.47  1.0000
   1  -2  -2    3000      18                                                         211   26.93   -0.47  1.0000
   1  -2  -2    2993      20                                                         209   26.93   -0.47  1.0000
   1  -2  -2    3125      18                                                         245   26.93   -0.47  1.0000
   0   2   1     341      49                                                         795  -31.21   -0.33  1.0000
   0   2   1     334      57                                                         806  -31.21   -0.33  1.0000
   0   2   1     288      58                                                         882  -31.21   -0.33  1.0000
   0   2   1     337      64                                                         801  -31.21   -0.33  1.0000
   0  -2  -1     283      50                                                         890  -31.21    0.33  1.0000
   0  -2  -1     459      49                                                         637  -31.21    0.33  1.0000
   0  -2  -1     341      64                                                         794  -31.21    0.33  1.0000
   0  -2  -1     359      52                                                         767  -31.21    0.33  1.0000
   1   2   0   15743     463                                                        7657  -25.40   -0.39  1.0000
   1   2   0   15465     570                                                        7463  -25.40   -0.39  1.0000
  -1  -2   0   15181     463                                                        7266  -25.40    0.39  1.0000
  -1  -2   0   15942     438                                                        7796  -25.40    0.39  1.0000
  -1  -2   0   15570     437                                                        7536  -25.40    0.39  1.0000
   2   2  -1   49777    2798                                                       42631  -11.13    0.05  1.0000
  -2  -2   1   51559    3075                                                       44281  -11.13   -0.05  1.0000
  -2  -2   1   56531    2643                                                       48897  -11.13   -0.05  1.0000
  -2  -2   1   54390    2650                                                       46908  -11.13   -0.05  1.0000
  -2  -2   1   54343    3074                                                       46864  -11.13   -0.05  1.0000
   3   2  -2    9283     639                                                       10038   -2.57   -0.14  1.0000
  -3  -2   2    9785     603                                                       10560   -2.57    0.14  1.0000
  -3  -2   2    9697     781                                                       10469   -2.57    0.14  1.0000
  -3  -2   2   10258     702                                                       11051   -2.57    0.14  1.0000
  -3  -2   2    8885     701                                                        9624   -2.57    0.14  1.0000
  -3  -2   2   10012     605                                                       10796   -2.57    0.14  1.0000
   4   2  -3    3070     303                                                        4723    8.91   -0.15  1.0000
  -4  -2   3    3275     333                                                        4977    8.91    0.15  1.0000
  -4  -2   3    3350     334                                                        5069    8.91    0.15  1.0000
  -4  -2   3    3212     288                                                        4899    8.91    0.15  1.0000
  -4  -2   3    2967     371                                                        4595    8.91    0.15  1.0000
  -4  -2   3    3378     287                                                        5103    8.91    0.15  1.0000
   5   2  -4    3519     170                                                        2580    5.71   -0.07  1.0000
  -5  -2   4    3428     208                                                        2502    5.71    0.07  1.0000
  -5  -2   4    3695     187                                                        2731    5.71    0.07  1.0000
  -5  -2   4    3541     161                                                        2599    5.71    0.07  1.0000
  -5  -2   4    3920     189                                                        2925    5.71    0.07  1.0000
  -5  -2   4    3743     162                                                        2772    5.71    0.07  1.0000
   6   2  -5       2       6                                                           9   -1.19    0.00  1.0000
  -6  -2   5       7       9                                                          19   -1.19    0.00  1.0000
  -6  -2   5      10       9                                                          24   -1.19    0.00  1.0000
  -6  -2   5       0       6                                                           2   -1.19    0.00  1.0000
  -6  -2   5       3       6                                                           0   -1.19    0.00  1.0000
  -7  -2   6      10       6                                                           0    2.08    0.16  1.0000
  -7  -2   6       0       7                                                           9    2.08    0.16  1.0000
  -7  -2   6      10       9                                                          -6    2.08    0.16  1.0000
  -8  -2   7       9       7                                                          -3   -2.04   -0.08  1.0000
  -8  -2   7       9       6                                                          -9   -2.04   -0.08  1.0000
  -8  -2   7      23      10                                                           3   -2.04   -0.08  1.0000
  -9  -2   8     587      69                                                         936   -4.25   -0.49  1.0000
  -9  -2   8     660      69                                                        1027   -4.25   -0.49  1.0000
  10   2  -9     211      24                                                         199   -0.28   -0.08  1.0000
 -10  -2   9     201      23                                                         189   -0.28    0.08  1.0000
 -10  -2   9     178      23                                                         167   -0.28    0.08  1.0000
 -10  -2   9     187      26                                                         176   -0.28    0.08  1.0000
  11   2 -10     216      34                                                         276    1.29   -0.06  1.0000
 -11  -2  10     251      38                                                         316    1.29    0.06  1.0000
 -11  -2  10     223      33                                                         284    1.29    0.06  1.0000
 -11  -2  10     264      34                                                         330    1.29    0.06  1.0000
 -12  -2  11       2      14                                                           0    0.85    0.19  1.0000
 -12  -2  11       5      16                                                           1    0.85    0.19  1.0000
 -12  -2  11       2      13                                                          -2    0.85    0.19  1.0000
 -12   1  13      51      19                                                          56    0.22   -0.19  1.0000
 -12   1  13      26      17                                                          29    0.22   -0.19  1.0000
 -11   1  12     520      44                                                         520    0.00   -0.14  1.0000
 -11   1  12     456      43                                                         456    0.00   -0.14  1.0000
 -11   1  12     436      48                                                         436    0.00   -0.14  1.0000
  11  -1 -12     349      42                                                         349    0.00    0.14  1.0000
 -10   1  11       3      11                                                           5   -1.68   -0.16  1.0000
 -10   1  11       3       9                                                           7   -1.68   -0.16  1.0000
  10  -1 -11       3       9                                                           5   -1.68    0.16  1.0000
  -9   1  10     926      59                                                         784   -1.62   -0.06  1.0000
  -9   1  10     906      58                                                         766   -1.62   -0.06  1.0000
  -8   1   9     297      33                                                         366   -1.28    0.08  1.0000
  -8   1   9     285      33                                                         353   -1.28    0.08  1.0000
  -7   1   8     112      22                                                         116   -0.12    0.01  1.0000
  -7   1   8     109      17                                                         113   -0.12    0.01  1.0000
  -7   1   8     100      16                                                         104   -0.12    0.01  1.0000
   7  -1  -8     135      18                                                         139   -0.12   -0.01  1.0000
   7  -1  -8     142      18                                                         146   -0.12   -0.01  1.0000
  -6   1   7     792      32                                                         390    5.63   -0.31  1.0000
  -6   1   7     792      31                                                         390    5.63   -0.31  1.0000
  -6   1   7     802      40                                                         397    5.63   -0.31  1.0000
  -6   1   7     713      34                                                         335    5.63   -0.31  1.0000
   6  -1  -7     784      31                                                         384    5.63    0.31  1.0000
   6  -1  -7     753      32                                                         363    5.63    0.31  1.0000
   6  -1  -7     704      31                                                         329    5.63    0.31  1.0000
  -5   1   6       1       9                                                          31    3.30   -0.14  1.0000
  -5   1   6       1       9                                                          31    3.30   -0.14  1.0000
  -5   1   6       0       9                                                          24    3.30   -0.14  1.0000
  -5   1   6       1       8                                                          18    3.30   -0.14  1.0000
  -5   1   6       3      11                                                          43    3.30   -0.14  1.0000
  -5   1   6       0       9                                                          19    3.30   -0.14  1.0000
   5  -1  -6       2       7                                                          14    3.30    0.14  1.0000
   5  -1  -6       2       7                                                          12    3.30    0.14  1.0000
   5  -1  -6       0       7                                                          19    3.30    0.14  1.0000
  -4   1   5      88      11                                                          36    2.25    0.21  1.0000
  -4   1   5      31       6                                                           5    2.25    0.21  1.0000
  -4   1   5      47       7                                                          12    2.25    0.21  1.0000
  -3   1   4    2062     136                                                        2308   -1.76   -0.20  1.0000
  -3   1   4    2404     177                                                        2670   -1.76   -0.20  1.0000
  -3   1   4    2140     137                                                        2391   -1.76   -0.20  1.0000
  -3   1   4    1978     144                                                        2220   -1.76   -0.20  1.0000
  -3   1   4    1886     124                                                        2122   -1.76   -0.20  1.0000
   3  -1  -4    2026     143                                                        2270   -1.76    0.20  1.0000
   3  -1  -4    1796     143                                                        2026   -1.76    0.20  1.0000
   3  -1  -4    1929     136                                                        2168   -1.76    0.20  1.0000
  -2   1   3   15520     540                                                        6951  -27.57   -0.13  1.0000
  -2   1   3   17905     465                                                        8575  -27.57   -0.13  1.0000
  -2   1   3   17397     466                                                        8225  -27.57   -0.13  1.0000
  -2   1   3   16752     423                                                        7783  -27.57   -0.13  1.0000
  -2   1   3   17083     493                                                        8009  -27.57   -0.13  1.0000
   2  -1  -3   17182     491                                                        8077  -27.57    0.13  1.0000
   2  -1  -3   18013     466                                                        8650  -27.57    0.13  1.0000
   2  -1  -3   16778     493                                                        7801  -27.57    0.13  1.0000
  -1   1   2   13235     487                                                        7174  -20.30   -0.07  1.0000
  -1   1   2   15040     418                                                        8518  -20.30   -0.07  1.0000
  -1   1   2   15038     459                                                        8516  -20.30   -0.07  1.0000
  -1   1   2   14270     460                                                        7941  -20.30   -0.07  1.0000
   1  -1  -2   13131     460                                                        7097  -20.30    0.07  1.0000
   1  -1  -2   14384     487                                                        8026  -20.30    0.07  1.0000
   1  -1  -2   14615     533                                                        8199  -20.30    0.07  1.0000
   0   1   1    7700      15                                                         142   50.73    0.21  1.0000
   0   1   1    7999      14                                                         185   50.73    0.21  1.0000
   0  -1  -1    7618      12                                                         131   50.73   -0.21  1.0000
   0  -1  -1    7700      11                                                         142   50.73   -0.21  1.0000
   1   1   0    6193    1066                                                       14284   27.31    0.17  1.0000
   1   1   0    5984     865                                                       13965   27.31    0.17  1.0000
  -1  -1   0    6625     816                                                       14937   27.31   -0.17  1.0000
  -1  -1   0    5930     867                                                       13883   27.31   -0.17  1.0000
  -1  -1   0    5822     819                                                       13717   27.31   -0.17  1.0000
   2   1  -1   12513     761                                                       12194    0.96    0.10  1.0000
  -2  -1   1   13043     718                                                       12718    0.96   -0.10  1.0000
  -2  -1   1   13011     836                                                       12686    0.96   -0.10  1.0000
  -2  -1   1   12975     721                                                       12650    0.96   -0.10  1.0000
  -2  -1   1   12870     931                                                       12547    0.96   -0.10  1.0000
  -2  -1   1   12182     763                                                       11868    0.96   -0.10  1.0000
   3   1  -2    2478     146                                                        2262   -1.48    0.21  1.0000
   3   1  -2    2468     181                                                        2253   -1.48    0.21  1.0000
  -3  -1   2    2500     161                                                        2283   -1.48   -0.21  1.0000
  -3  -1   2    2804     162                                                        2574   -1.48   -0.21  1.0000
  -3  -1   2    2651     139                                                        2428   -1.48   -0.21  1.0000
  -3  -1   2    2340     179                                                        2130   -1.48   -0.21  1.0000
  -3  -1   2    2673     139                                                        2449   -1.48   -0.21  1.0000
  -3  -1   2    2555     126                                                        2336   -1.48   -0.21  1.0000
  -3  -1   2    2521     146                                                        2303   -1.48   -0.21  1.0000
   4   1  -3     539      75                                                        1146   -7.11    0.02  1.0000
   4   1  -3     493      93                                                        1079   -7.11    0.02  1.0000
   4   1  -3     584      72                                                        1211   -7.11    0.02  1.0000
  -4  -1   3     536      72                                                        1141   -7.11   -0.02  1.0000
  -4  -1   3     631      84                                                        1279   -7.11   -0.02  1.0000
  -4  -1   3     495      64                                                        1082   -7.11   -0.02  1.0000
  -4  -1   3     555      72                                                        1169   -7.11   -0.02  1.0000
  -4  -1   3     483      74                                                        1063   -7.11   -0.02  1.0000
  -4  -1   3     529      92                                                        1131   -7.11   -0.02  1.0000
   5   1  -4    3909     240                                                        3019   -5.07    0.11  1.0000
   5   1  -4    3893     195                                                        3005   -5.07    0.11  1.0000
   5   1  -4    4126     185                                                        3210   -5.07    0.11  1.0000
  -5  -1   4    3952     167                                                        3057   -5.07   -0.11  1.0000
  -5  -1   4    3821     194                                                        2942   -5.07   -0.11  1.0000
  -5  -1   4    3776     238                                                        2902   -5.07   -0.11  1.0000
  -5  -1   4    4423     216                                                        3473   -5.07   -0.11  1.0000
  -5  -1   4    4132     185                                                        3215   -5.07   -0.11  1.0000
  -5  -1   4    3848     184                                                        2965   -5.07   -0.11  1.0000
   6   1  -5      32       8                                                          20    0.79    0.16  1.0000
   6   1  -5      39       9                                                          26    0.79    0.16  1.0000
  -6  -1   5      23       9                                                          13    0.79   -0.16  1.0000
  -6  -1   5      23       9                                                          13    0.79   -0.16  1.0000
  -6  -1   5      29       8                                                          18    0.79   -0.16  1.0000
  -6  -1   5      30       8                                                          19    0.79   -0.16  1.0000
  -7  -1   6     267      29                                                         214   -1.14   -0.07  1.0000
  -7  -1   6     314      24                                                         256   -1.14   -0.07  1.0000
  -7  -1   6     279      23                                                         225   -1.14   -0.07  1.0000
  -8  -1   7      22      16                                                          86    3.08    0.18  1.0000
  -8  -1   7      31      21                                                         104    3.08    0.18  1.0000
  -8  -1   7      11      15                                                          62    3.08    0.18  1.0000
  -9  -1   8    1094      55                                                         748    3.83    0.25  1.0000
  -9  -1   8    1059      55                                                         719    3.83    0.25  1.0000
  10   1  -9     264      28                                                         233   -0.66    0.06  1.0000
 -10  -1   9     309      28                                                         275   -0.66   -0.06  1.0000
  11   1 -10      12      17                                                          39   -1.84    0.05  1.0000
 -11  -1  10      12      15                                                          39   -1.84   -0.05  1.0000
 -11  -1  10       6      15                                                          28   -1.84   -0.05  1.0000
 -11  -1  10      15      17                                                          44   -1.84   -0.05  1.0000
  12   1 -11      34      17                                                          19   -1.02    0.33  1.0000
 -12  -1  11      70      20                                                          47   -1.02   -0.33  1.0000
 -12  -1  11      41      15                                                          24   -1.02   -0.33  1.0000
 -12  -1  11      38      17                                                          22   -1.02   -0.33  1.0000
 -12   0  13     131      25                                                         131    0.00    0.28  1.0000
 -12   0  13     147      27                                                         147    0.00    0.28  1.0000
 -11   0  12      29      15                                                          22    0.44    0.15  1.0000
 -11   0  12      39      15                                                          31    0.44    0.15  1.0000
  11   0 -12      22      15                                                          16    0.44   -0.15  1.0000
 -10   0  11     192      30                                                         273    1.78    0.14  1.0000
 -10   0  11     183      29                                                         262    1.78    0.14  1.0000
  10   0 -11     204      31                                                         287    1.78   -0.14  1.0000
  -9   0  10      35      14                                                          58    1.14    0.02  1.0000
  -9   0  10      18      12                                                          36    1.14    0.02  1.0000
  -8   0   9      23      11                                                          15    0.64   -0.18  1.0000
  -8   0   9      37      11                                                          26    0.64   -0.18  1.0000
  -8   0   9      55      12                                                          42    0.64   -0.18  1.0000
   8   0  -9      62      10                                                          48    0.64    0.18  1.0000
  -7   0   8    1885     119                                                        1921   -0.28    0.06  1.0000
  -7   0   8    1712     153                                                        1747   -0.28    0.06  1.0000
  -7   0   8    2002     121                                                        2039   -0.28    0.06  1.0000
  -6   0   7      31      21                                                         220   -6.20    0.42  1.0000
  -6   0   7      25      20                                                         204   -6.20    0.42  1.0000
  -6   0   7      20      25                                                         190   -6.20    0.42  1.0000
  -6   0   7      18      22                                                         181   -6.20    0.42  1.0000
   6   0  -7      23      20                                                         199   -6.20   -0.42  1.0000
   6   0  -7      18      20                                                         183   -6.20   -0.42  1.0000
  -5   0   6      24       5                                                          -3   -3.31    0.05  1.0000
  -5   0   6      24       6                                                          -5   -3.31    0.05  1.0000
  -5   0   6      16       7                                                           1   -3.31    0.05  1.0000
  -5   0   6      24       5                                                          -4   -3.31    0.05  1.0000
  -5   0   6       7       6                                                           5   -3.31    0.05  1.0000
  -5   0   6      24       4                                                          -8   -3.31    0.05  1.0000
  -5   0   6      13       5                                                           2   -3.31    0.05  1.0000
   5   0  -6      24       4                                                          -4   -3.31   -0.05  1.0000
   5   0  -6      24       5                                                          -4   -3.31   -0.05  1.0000
   5   0  -6      24       6                                                           0   -3.31   -0.05  1.0000
  -4   0   5     912      54                                                         914   -0.02   -0.07  1.0000
  -4   0   5     938      62                                                         940   -0.02   -0.07  1.0000
  -4   0   5     958      60                                                         960   -0.02   -0.07  1.0000
  -4   0   5     821      76                                                         822   -0.02   -0.07  1.0000
  -4   0   5    1014      70                                                        1016   -0.02   -0.07  1.0000
  -4   0   5     950      60                                                         952   -0.02   -0.07  1.0000
  -4   0   5     974      69                                                         976   -0.02   -0.07  1.0000
   4   0  -5     956      63                                                         958   -0.02    0.07  1.0000
   4   0  -5     861      59                                                         862   -0.02    0.07  1.0000
   4   0  -5     915      62                                                         917   -0.02    0.07  1.0000
  -3   0   4    1149     106                                                        1868    6.23    0.33  1.0000
  -3   0   4     960     122                                                        1625    6.23    0.33  1.0000
  -3   0   4    1072     111                                                        1769    6.23    0.33  1.0000
  -3   0   4    1166     106                                                        1889    6.23    0.33  1.0000
  -3   0   4    1042      96                                                        1731    6.23    0.33  1.0000
  -3   0   4     886     136                                                        1527    6.23    0.33  1.0000
  -3   0   4    1189     123                                                        1918    6.23    0.33  1.0000
   3   0  -4    1072     106                                                        1769    6.23   -0.33  1.0000
   3   0  -4    1035     111                                                        1722    6.23   -0.33  1.0000
   3   0  -4    1059     111                                                        1753    6.23   -0.33  1.0000
  -2   0   3    2214     514                                                        8191   29.07   -0.16  1.0000
  -2   0   3    1679     469                                                        7128   29.07   -0.16  1.0000
  -2   0   3    2010     403                                                        7794   29.07   -0.16  1.0000
  -2   0   3    1924     443                                                        7623   29.07   -0.16  1.0000
  -2   0   3    2009     442                                                        7791   29.07   -0.16  1.0000
  -2   0   3    1831     514                                                        7438   29.07   -0.16  1.0000
   2   0  -3    1747     469                                                        7267   29.07    0.16  1.0000
   2   0  -3    1843     443                                                        7462   29.07    0.16  1.0000
   2   0  -3    2100     468                                                        7970   29.07    0.16  1.0000
  -1   0   2   18920    1029                                                       16302    6.60   -0.11  1.0000
  -1   0   2   17076     884                                                       14594    6.60   -0.11  1.0000
  -1   0   2   16138     806                                                       13728    6.60   -0.11  1.0000
  -1   0   2   19071    1147                                                       16443    6.60   -0.11  1.0000
  -1   0   2   17445     887                                                       14935    6.60   -0.11  1.0000
  -1   0   2   18308    1029                                                       15735    6.60   -0.11  1.0000
  -1   0   2   18842    1155                                                       16230    6.60   -0.11  1.0000
   1   0  -2   16599     939                                                       14153    6.60    0.11  1.0000
   1   0  -2   18541     887                                                       15951    6.60    0.11  1.0000
   0   0   1   30711     436                                                        5911  -65.81   -0.10  1.0000
   0   0   1   30943     388                                                        6013  -65.81   -0.10  1.0000
   0   0   1   31851     354                                                        6417  -65.81   -0.10  1.0000
   0   0  -1   30085     354                                                        5638  -65.81    0.10  1.0000
   0   0  -1   30361     334                                                        5758  -65.81    0.10  1.0000
   0   0  -1   28308     334                                                        4884  -65.81    0.10  1.0000
   1   0   0   14860     632                                                        8683  -19.21   -0.13  1.0000
   1   0   0   14630     512                                                        8507  -19.21   -0.13  1.0000
  -1   0   0   13621     562                                                        7742  -19.21    0.13  1.0000
  -1   0   0   14450     514                                                        8370  -19.21    0.13  1.0000
  -1   0   0   14715     441                                                        8572  -19.21    0.13  1.0000
   2   0  -1     628      10                                                         118    9.49   -0.06  1.0000
   2   0  -1     611      10                                                         111    9.49   -0.06  1.0000
  -2   0   1     597      11                                                         105    9.49    0.06  1.0000
  -2   0   1     583       9                                                          99    9.49    0.06  1.0000
  -2   0   1     628      11                                                         118    9.49    0.06  1.0000
  -2   0   1     623      13                                                         116    9.49    0.06  1.0000
   3   0  -2     202      21                                                         271    1.50   -0.12  1.0000
   3   0  -2     232      21                                                         305    1.50   -0.12  1.0000
  -3   0   2     136      20                                                         194    1.50    0.12  1.0000
  -3   0   2     254      21                                                         331    1.50    0.12  1.0000
  -3   0   2     239      22                                                         313    1.50    0.12  1.0000
  -3   0   2     161      25                                                         223    1.50    0.12  1.0000
  -3   0   2     217      18                                                         288    1.50    0.12  1.0000
   4   0  -3    2594     198                                                        3434    5.13    0.05  1.0000
   4   0  -3    2450     188                                                        3268    5.13    0.05  1.0000
  -4   0   3    1969     216                                                        2708    5.13   -0.05  1.0000
  -4   0   3    2198     170                                                        2976    5.13   -0.05  1.0000
  -4   0   3    2417     198                                                        3230    5.13   -0.05  1.0000
  -4   0   3    1985     187                                                        2727    5.13   -0.05  1.0000
  -4   0   3    2498     187                                                        3324    5.13   -0.05  1.0000
  -4   0   3    2734     243                                                        3595    5.13   -0.05  1.0000
   5   0  -4     226      39                                                         537    5.44   -0.18  1.0000
   5   0  -4     219      41                                                         526    5.44   -0.18  1.0000
  -5   0   4     273      52                                                         608    5.44    0.18  1.0000
  -5   0   4     239      40                                                         557    5.44    0.18  1.0000
  -5   0   4     263      40                                                         593    5.44    0.18  1.0000
  -5   0   4     233      35                                                         548    5.44    0.18  1.0000
  -5   0   4     262      46                                                         591    5.44    0.18  1.0000
  -5   0   4     218      41                                                         525    5.44    0.18  1.0000
   6   0  -5     646      54                                                         681   -0.46   -0.22  1.0000
   6   0  -5     761      53                                                         799   -0.46   -0.22  1.0000
  -6   0   5     740      61                                                         778   -0.46    0.22  1.0000
  -6   0   5     731      53                                                         768   -0.46    0.22  1.0000
  -6   0   5     719      53                                                         756   -0.46    0.22  1.0000
   7   0  -6    4546     281                                                        4496   -0.25    0.03  1.0000
  -7   0   6    4210     343                                                        4162   -0.25   -0.03  1.0000
  -7   0   6    4724     267                                                        4673   -0.25   -0.03  1.0000
  -7   0   6    4502     266                                                        4453   -0.25   -0.03  1.0000
   8   0  -7    3586     278                                                        4334   -3.98    0.13  1.0000
  -8   0   7    3693     263                                                        4452   -3.98   -0.13  1.0000
  -8   0   7    3779     264                                                        4546   -3.98   -0.13  1.0000
  -8   0   7    3373     339                                                        4100   -3.98   -0.13  1.0000
  -9   0   8     192      32                                                         330   -2.89   -0.07  1.0000
  -9   0   8     202      33                                                         344   -2.89   -0.07  1.0000
  10   0  -9     271      25                                                         193    1.73   -0.02  1.0000
 -10   0   9     289      26                                                         208    1.73    0.02  1.0000
 -10   0   9     325      27                                                         239    1.73    0.02  1.0000
  11   0 -10      10      11                                                          -5    2.14   -0.17  1.0000
 -11   0  10      17      12                                                           1    2.14    0.17  1.0000
 -11   0  10      36      12                                                           8    2.14    0.17  1.0000
 -11   0  10      10      10                                                          -4    2.14    0.17  1.0000
  12   0 -11       1      18                                                           7    0.92   -0.40  1.0000
 -12   0  11       8      17                                                          18    0.92    0.40  1.0000
 -12   0  11       3      14                                                          10    0.92    0.40  1.0000
 -12   0  11       6      16                                                          15    0.92    0.40  1.0000
 -12  -1  13      16      15                                                          17   -0.08   -0.33  1.0000
 -12  -1  13      18      17                                                          19   -0.08   -0.33  1.0000
 -11  -1  12      47      14                                                          32   -0.79   -0.08  1.0000
 -11  -1  12      46      16                                                          31   -0.79   -0.08  1.0000
 -11  -1  12      38      15                                                          25   -0.79   -0.08  1.0000
  11   1 -12      37      16                                                          24   -0.79    0.08  1.0000
 -10  -1  11     164      28                                                         237   -1.74   -0.06  1.0000
 -10  -1  11     178      28                                                         254   -1.74   -0.06  1.0000
 -10  -1  11     186      32                                                         263   -1.74   -0.06  1.0000
  10   1 -11     183      29                                                         260   -1.74    0.06  1.0000
  -9  -1  10     331      29                                                         305   -0.49    0.00  1.0000
  -9  -1  10     313      29                                                         288   -0.49    0.00  1.0000
  -8  -1   9     799      59                                                         804   -0.07    0.11  1.0000
  -8  -1   9     885      60                                                         891   -0.07    0.11  1.0000
  -7  -1   8      52      13                                                          70    0.78   -0.14  1.0000
  -7  -1   8      91      15                                                         114    0.78   -0.14  1.0000
  -7  -1   8      36      16                                                          51    0.78   -0.14  1.0000
  -6  -1   7       0      15                                                         110    6.87   -0.27  1.0000
  -6  -1   7       3      13                                                          73    6.87   -0.27  1.0000
  -6  -1   7       4      15                                                          70    6.87   -0.27  1.0000
  -6  -1   7       0      14                                                          92    6.87   -0.27  1.0000
   6   1  -7       4      12                                                          68    6.87    0.27  1.0000
  -5  -1   6     514      48                                                         702    2.56   -0.06  1.0000
  -5  -1   6     590      58                                                         791    2.56   -0.06  1.0000
  -5  -1   6     513      62                                                         701    2.56   -0.06  1.0000
  -5  -1   6     510      43                                                         698    2.56   -0.06  1.0000
  -5  -1   6     551      49                                                         746    2.56   -0.06  1.0000
  -5  -1   6     542      56                                                         735    2.56   -0.06  1.0000
   5   1  -6     544      48                                                         737    2.56    0.06  1.0000
   5   1  -6     561      51                                                         757    2.56    0.06  1.0000
   5   1  -6     491      50                                                         675    2.56    0.06  1.0000
  -4  -1   5       4      10                                                          53   -3.52   -0.13  1.0000
  -4  -1   5       1      10                                                          41   -3.52   -0.13  1.0000
  -4  -1   5      10      13                                                          71   -3.52   -0.13  1.0000
  -4  -1   5      10      11                                                          70   -3.52   -0.13  1.0000
  -4  -1   5       6       8                                                          58   -3.52   -0.13  1.0000
  -4  -1   5       6      10                                                          60   -3.52   -0.13  1.0000
   4   1  -5       7       9                                                          64   -3.52    0.13  1.0000
   4   1  -5       6       9                                                          60   -3.52    0.13  1.0000
   4   1  -5      12      10                                                          76   -3.52    0.13  1.0000
  -3  -1   4     153      50                                                         754  -10.09   -0.21  1.0000
  -3  -1   4     111      50                                                         655  -10.09   -0.21  1.0000
  -3  -1   4     106      55                                                         644  -10.09   -0.21  1.0000
  -3  -1   4     140      43                                                         725  -10.09   -0.21  1.0000
  -3  -1   4     124      43                                                         688  -10.09   -0.21  1.0000
   3   1  -4     102      42                                                         634  -10.09    0.21  1.0000
   3   1  -4     118      45                                                         674  -10.09    0.21  1.0000
   3   1  -4     103      45                                                         637  -10.09    0.21  1.0000
  -2  -1   3   21316    1814                                                       32918  -23.70    0.33  1.0000
  -2  -1   3   18369    1820                                                       29229  -23.70    0.33  1.0000
  -2  -1   3   22715    2111                                                       34651  -23.70    0.33  1.0000
  -2  -1   3   20154    2112                                                       31470  -23.70    0.33  1.0000
   2   1  -3   18930    1922                                                       29936  -23.70   -0.33  1.0000
   2   1  -3   19712    1928                                                       30917  -23.70   -0.33  1.0000
  -1  -1   2    4984     232                                                        3110    9.92    0.11  1.0000
  -1  -1   2    5085     177                                                        3190    9.92    0.11  1.0000
  -1  -1   2    5157     178                                                        3247    9.92    0.11  1.0000
   1   1  -2    4447     189                                                        2689    9.92   -0.11  1.0000
   1   1  -2    4836     189                                                        2993    9.92   -0.11  1.0000
   0  -1   1   12128       6                                                          82   67.62    0.08  1.0000
   0   1  -1   12223       6                                                          90   67.62   -0.08  1.0000
   0   1  -1   12164       5                                                          85   67.62   -0.08  1.0000
   1  -1   0     213       6                                                          53    4.89   -0.02  1.0000
   1  -1   0     201       5                                                          47    4.89   -0.02  1.0000
   1  -1   0     211       6                                                          52    4.89   -0.02  1.0000
  -1   1   0     188       5                                                          41    4.89    0.02  1.0000
  -1   1   0     209       6                                                          51    4.89    0.02  1.0000
  -1   1   0     195       5                                                          44    4.89    0.02  1.0000
  -1   1   0     219       5                                                          56    4.89    0.02  1.0000
  -1   1   0     211       6                                                          52    4.89    0.02  1.0000
   2  -1  -1     278      87                                                        1400  -13.87   -0.10  1.0000
   2  -1  -1     261      92                                                        1362  -13.87   -0.10  1.0000
  -2   1   1     407     113                                                        1674  -13.87    0.10  1.0000
  -2   1   1     295      79                                                        1437  -13.87    0.10  1.0000
  -2   1   1     299      88                                                        1445  -13.87    0.10  1.0000
  -2   1   1     289      92                                                        1425  -13.87    0.10  1.0000
   3  -1  -2    4082     230                                                        4204    0.63    0.12  1.0000
   3  -1  -2    4274     243                                                        4398    0.63    0.12  1.0000
  -3   1   2    3978     243                                                        4098    0.63   -0.12  1.0000
  -3   1   2    3286     230                                                        3395    0.63   -0.12  1.0000
  -3   1   2    3274     296                                                        3383    0.63   -0.12  1.0000
  -3   1   2    4004     209                                                        4125    0.63   -0.12  1.0000
  -3   1   2    3635     229                                                        3750    0.63   -0.12  1.0000
   4  -1  -3    6567     314                                                        5402   -5.04   -0.07  1.0000
   4  -1  -3    6332     298                                                        5189   -5.04   -0.07  1.0000
  -4   1   3    6300     315                                                        5160   -5.04    0.07  1.0000
  -4   1   3    5882     384                                                        4783   -5.04    0.07  1.0000
  -4   1   3    5737     344                                                        4652   -5.04    0.07  1.0000
  -4   1   3    6504     297                                                        5345   -5.04    0.07  1.0000
  -4   1   3    5974     270                                                        4866   -5.04    0.07  1.0000
   5  -1  -4    1958     175                                                        2882   -6.31    0.17  1.0000
   5  -1  -4    1750     183                                                        2628   -6.31    0.17  1.0000
  -5   1   4    2001     158                                                        2933   -6.31   -0.17  1.0000
  -5   1   4    1853     183                                                        2754   -6.31   -0.17  1.0000
  -5   1   4    2028     225                                                        2966   -6.31   -0.17  1.0000
  -5   1   4    1996     175                                                        2927   -6.31   -0.17  1.0000
  -5   1   4    1944     202                                                        2865   -6.31   -0.17  1.0000
  -5   1   4    2208     175                                                        3183   -6.31   -0.17  1.0000
   6  -1  -5    1648     103                                                        1764    0.94    0.18  1.0000
   6  -1  -5    1529     108                                                        1641    0.94    0.18  1.0000
  -6   1   5    1565     132                                                        1678    0.94   -0.18  1.0000
  -6   1   5    1365     102                                                        1471    0.94   -0.18  1.0000
  -6   1   5    1453     102                                                        1562    0.94   -0.18  1.0000
  -6   1   5    1507      92                                                        1618    0.94   -0.18  1.0000
  -6   1   5    1430     118                                                        1538    0.94   -0.18  1.0000
   7  -1  -6       0       8                                                          10    2.26   -0.04  1.0000
  -7   1   6      11       9                                                          -8    2.26    0.04  1.0000
  -7   1   6       1       8                                                           6    2.26    0.04  1.0000
  -7   1   6      11       6                                                         -15    2.26    0.04  1.0000
   8  -1  -7       0      13                                                          50    4.45   -0.01  1.0000
  -8   1   7       3      15                                                          71    4.45    0.01  1.0000
  -8   1   7       3      14                                                          70    4.45    0.01  1.0000
  -9   1   8       4       7                                                         -10    1.37   -0.02  1.0000
  -9   1   8       4       9                                                          -4    1.37   -0.02  1.0000
  10  -1  -9      90      24                                                         181   -2.66    0.10  1.0000
 -10   1   9      62      23                                                         140   -2.66   -0.10  1.0000
 -10   1   9      68      22                                                         150   -2.66   -0.10  1.0000
  11  -1 -10     282      42                                                         392   -2.01    0.30  1.0000
 -11   1  10     262      39                                                         369   -2.01   -0.30  1.0000
 -11   1  10     293      39                                                         405   -2.01   -0.30  1.0000
  12  -1 -11       7      17                                                           3   -0.61    0.33  1.0000
 -12   1  11      40      16                                                          31   -0.61   -0.33  1.0000
 -12   1  11      14      13                                                           9   -0.61   -0.33  1.0000
 -12   1  11      14      13                                                           9   -0.61   -0.33  1.0000
 -12  -2  13       7      13                                                           7    0.09    0.29  1.0000
 -11  -2  12     794      54                                                         711    1.01   -0.02  1.0000
 -11  -2  12     777      54                                                         695    1.01   -0.02  1.0000
 -11  -2  12     705      61                                                         627    1.01   -0.02  1.0000
  11   2 -12     637      55                                                         563    1.01    0.02  1.0000
 -10  -2  11      42      16                                                          76    1.47    0.04  1.0000
 -10  -2  11      27      15                                                          55    1.47    0.04  1.0000
 -10  -2  11      30      17                                                          59    1.47    0.04  1.0000
  -9  -2  10       0       7                                                           0   -0.24   -0.04  1.0000
  -9  -2  10      13       9                                                          16   -0.24   -0.04  1.0000
  -9  -2  10       0       8                                                          -4   -0.24   -0.04  1.0000
  -8  -2   9       0       6                                                          -3   -0.47   -0.04  1.0000
  -8  -2   9       4       7                                                           2   -0.47   -0.04  1.0000
  -7  -2   8      23       7                                                           9   -1.23    0.15  1.0000
  -7  -2   8      15       9                                                           4   -1.23    0.15  1.0000
  -7  -2   8      38       9                                                          19   -1.23    0.15  1.0000
  -7  -2   8       3       5                                                         -10   -1.23    0.15  1.0000
  -6  -2   7       4      13                                                          78   -7.26    0.09  1.0000
  -6  -2   7       2      13                                                          92   -7.26    0.09  1.0000
  -6  -2   7       4      13                                                          79   -7.26    0.09  1.0000
  -6  -2   7       4      15                                                          79   -7.26    0.09  1.0000
   6   2  -7       1      13                                                          96   -7.26   -0.09  1.0000
  -5  -2   6     278      29                                                         317   -0.76    0.14  1.0000
  -5  -2   6     265      24                                                         303   -0.76    0.14  1.0000
  -5  -2   6     294      31                                                         334   -0.76    0.14  1.0000
  -5  -2   6     269      25                                                         308   -0.76    0.14  1.0000
  -5  -2   6     289      28                                                         329   -0.76    0.14  1.0000
   5   2  -6     302      24                                                         343   -0.76   -0.14  1.0000
   5   2  -6     217      24                                                         252   -0.76   -0.14  1.0000
  -4  -2   5     117      35                                                         524    8.08    0.20  1.0000
  -4  -2   5     119      35                                                         528    8.08    0.20  1.0000
  -4  -2   5     119      41                                                         528    8.08    0.20  1.0000
  -4  -2   5     132      40                                                         556    8.08    0.20  1.0000
  -4  -2   5     130      45                                                         552    8.08    0.20  1.0000
   4   2  -5      81      36                                                         444    8.08   -0.20  1.0000
  -3  -2   4     226      75                                                         985   10.95    0.05  1.0000
  -3  -2   4     302      65                                                        1139   10.95    0.05  1.0000
  -3  -2   4     316      76                                                        1166   10.95    0.05  1.0000
  -3  -2   4     270      83                                                        1076   10.95    0.05  1.0000
  -3  -2   4     284      65                                                        1103   10.95    0.05  1.0000
   3   2  -4     247      68                                                        1028   10.95   -0.05  1.0000
   3   2  -4     246      68                                                        1026   10.95   -0.05  1.0000
  -2  -2   3       6      21                                                         251   12.26   -0.35  1.0000
  -2  -2   3       7      19                                                         248   12.26   -0.35  1.0000
  -2  -2   3       3      20                                                         282   12.26   -0.35  1.0000
  -2  -2   3       4      17                                                         271   12.26   -0.35  1.0000
  -2  -2   3       2      17                                                         287   12.26   -0.35  1.0000
   2   2  -3       8      17                                                         243   12.26    0.35  1.0000
   2   2  -3       8      18                                                         242   12.26    0.35  1.0000
   2   2  -3       8      17                                                         242   12.26    0.35  1.0000
   0  -2   1   33614     638                                                        9882  -56.15    0.15  1.0000
   0  -2   1   32465     550                                                        9264  -56.15    0.15  1.0000
   0  -2   1   33047     711                                                        9576  -56.15    0.15  1.0000
   0   2  -1   32426     500                                                        9243  -56.15   -0.15  1.0000
   1  -2   0     438      10                                                         111    6.96    0.17  1.0000
   1  -2   0     445      12                                                         115    6.96    0.17  1.0000
   1  -2   0     493      10                                                         140    6.96    0.17  1.0000
  -1   2   0     449      11                                                         117    6.96   -0.17  1.0000
  -1   2   0     503      10                                                         145    6.96   -0.17  1.0000
  -1   2   0     491      11                                                         139    6.96   -0.17  1.0000
  -1   2   0     407      10                                                          96    6.96   -0.17  1.0000
  -1   2   0     441      11                                                         113    6.96   -0.17  1.0000
   2  -2  -1    3094      91                                                        1404   12.14    0.03  1.0000
   2  -2  -1    3193      96                                                        1471   12.14    0.03  1.0000
   2  -2  -1    3292     106                                                        1539   12.14    0.03  1.0000
   2  -2  -1    3285      96                                                        1534   12.14    0.03  1.0000
  -2   2   1    3504     107                                                        1685   12.14   -0.03  1.0000
  -2   2   1    3128      83                                                        1427   12.14   -0.03  1.0000
  -2   2   1    3322      97                                                        1559   12.14   -0.03  1.0000
   3  -2  -2    1765     104                                                        1585   -1.47   -0.15  1.0000
   3  -2  -2    2025     100                                                        1832   -1.47   -0.15  1.0000
   3  -2  -2    1924     116                                                        1736   -1.47   -0.15  1.0000
  -3   2   2    1857     105                                                        1672   -1.47    0.15  1.0000
  -3   2   2    1603     114                                                        1432   -1.47    0.15  1.0000
  -3   2   2    1878      91                                                        1692   -1.47    0.15  1.0000
  -3   2   2    1665     128                                                        1490   -1.47    0.15  1.0000
   4  -2  -3    5561     246                                                        4223    6.42    0.09  1.0000
   4  -2  -3    5424     258                                                        4104    6.42    0.09  1.0000
  -4   2   3    5388     259                                                        4072    6.42   -0.09  1.0000
  -4   2   3    6260     246                                                        4835    6.42   -0.09  1.0000
  -4   2   3    5238     245                                                        3942    6.42   -0.09  1.0000
  -4   2   3    5320     284                                                        4013    6.42   -0.09  1.0000
  -4   2   3    5598     223                                                        4255    6.42   -0.09  1.0000
  -4   2   3    4921     316                                                        3668    6.42   -0.09  1.0000
   5  -2  -4     725      27                                                         294    6.54   -0.12  1.0000
   5  -2  -4     715      25                                                         288    6.54   -0.12  1.0000
  -5   2   4     827      34                                                         360    6.54    0.12  1.0000
  -5   2   4     677      28                                                         264    6.54    0.12  1.0000
  -5   2   4     792      27                                                         337    6.54    0.12  1.0000
  -5   2   4     712      23                                                         286    6.54    0.12  1.0000
  -5   2   4     701      26                                                         279    6.54    0.12  1.0000
  -5   2   4     719      26                                                         290    6.54    0.12  1.0000
   6  -2  -5    1547      82                                                        1247   -2.69   -0.03  1.0000
   6  -2  -5    1684      87                                                        1370   -2.69   -0.03  1.0000
  -6   2   5    1427      83                                                        1140   -2.69    0.03  1.0000
  -6   2   5    1576      75                                                        1273   -2.69    0.03  1.0000
  -6   2   5    1567      83                                                        1265   -2.69    0.03  1.0000
  -6   2   5    1564      96                                                        1262   -2.69    0.03  1.0000
  -6   2   5    1581     107                                                        1278   -2.69    0.03  1.0000
   7  -2  -6      73      24                                                         226   -4.34   -0.09  1.0000
   7  -2  -6     102      27                                                         275   -4.34   -0.09  1.0000
  -7   2   6      90      32                                                         255   -4.34    0.09  1.0000
  -7   2   6      59      24                                                         200   -4.34    0.09  1.0000
  -7   2   6      98      29                                                         269   -4.34    0.09  1.0000
  -7   2   6      83      25                                                         243   -4.34    0.09  1.0000
   8  -2  -7    1205     111                                                        1648   -3.94   -0.17  1.0000
  -8   2   7    1128     105                                                        1558   -3.94    0.17  1.0000
  -8   2   7    1124     104                                                        1554   -3.94    0.17  1.0000
   9  -2  -8     261      31                                                         284    0.47   -0.05  1.0000
  -9   2   8     278      31                                                         302    0.47    0.05  1.0000
  -9   2   8     258      30                                                         281    0.47    0.05  1.0000
  10  -2  -9      34      10                                                           1    3.23   -0.17  1.0000
 -10   2   9      34       9                                                           1    3.23    0.17  1.0000
 -10   2   9      23      10                                                          -1    3.23    0.17  1.0000
  11  -2 -10       5      14                                                           0    1.51   -0.30  1.0000
 -11   2  10       5      12                                                           0    1.51    0.30  1.0000
 -11   2  10      25      13                                                           8    1.51    0.30  1.0000
  12  -2 -11      78      25                                                          84    0.22   -0.17  1.0000
 -12   2  11      79      23                                                          85    0.22    0.17  1.0000
 -12   2  11      77      24                                                          83    0.22    0.17  1.0000
 -12   2  11      77      23                                                          83    0.22    0.17  1.0000
 -11  -3  12      10      12                                                           3   -1.01    0.04  1.0000
 -11  -3  12      25      14                                                          12   -1.01    0.04  1.0000
  11   3 -12      28      13                                                          14   -1.01   -0.04  1.0000
 -10  -3  11       3       8                                                          -3   -1.08   -0.05  1.0000
 -10  -3  11      21      10                                                           9   -1.08   -0.05  1.0000
 -10  -3  11      23      10                                                          10   -1.08   -0.05  1.0000
  -9  -3  10      10      11                                                          21    0.92    0.19  1.0000
  -9  -3  10      24      11                                                          40    0.92    0.19  1.0000
  -8  -3   9      14      10                                                          24    0.77   -0.04  1.0000
  -8  -3   9       9       9                                                          17    0.77   -0.04  1.0000
  -8  -3   9      16       9                                                          26    0.77   -0.04  1.0000
  -7  -3   8    1692     111                                                        1875    1.45   -0.15  1.0000
  -7  -3   8    1592     111                                                        1770    1.45   -0.15  1.0000
  -7  -3   8    1658     129                                                        1839    1.45   -0.15  1.0000
  -7  -3   8    1448     142                                                        1618    1.45   -0.15  1.0000
  -6  -3   7     291      71                                                         772    7.18    0.05  1.0000
  -6  -3   7     349      57                                                         866    7.18    0.05  1.0000
  -6  -3   7     363      57                                                         888    7.18    0.05  1.0000
  -6  -3   7     354      65                                                         873    7.18    0.05  1.0000
   6   3  -7     361      60                                                         884    7.18   -0.05  1.0000
  -5  -3   6       7      10                                                          36   -2.22   -0.19  1.0000
  -5  -3   6       1       8                                                          20   -2.22   -0.19  1.0000
  -5  -3   6       6       8                                                          33   -2.22   -0.19  1.0000
  -5  -3   6       5       8                                                          30   -2.22   -0.19  1.0000
  -5  -3   6       5       9                                                          30   -2.22   -0.19  1.0000
   5   3  -6       8       9                                                          37   -2.22    0.19  1.0000
  -4  -3   5      12      17                                                         205  -11.93   -0.17  1.0000
  -4  -3   5      13      20                                                         202  -11.93   -0.17  1.0000
  -4  -3   5      11      20                                                         210  -11.93   -0.17  1.0000
  -4  -3   5      13      19                                                         204  -11.93   -0.17  1.0000
  -4  -3   5      10      17                                                         214  -11.93   -0.17  1.0000
   4   3  -5      19      17                                                         183  -11.93    0.17  1.0000
  -3  -3   4     296       7                                                          35   -7.55    0.05  1.0000
  -3  -3   4     326       7                                                          46   -7.55    0.05  1.0000
  -3  -3   4     334       7                                                          49   -7.55    0.05  1.0000
  -3  -3   4     316       8                                                          42   -7.55    0.05  1.0000
  -3  -3   4     272       7                                                          27   -7.55    0.05  1.0000
   3   3  -4     290       8                                                          33   -7.55   -0.05  1.0000
   3   3  -4     293       6                                                          34   -7.55   -0.05  1.0000
  -2  -3   3   21970    1482                                                       21836   -0.30    0.27  1.0000
  -2  -3   3   23273    1273                                                       23135   -0.30    0.27  1.0000
  -2  -3   3   22256    1268                                                       22121   -0.30    0.27  1.0000
  -2  -3   3   22664    1653                                                       22528   -0.30    0.27  1.0000
   2   3  -3   22669    1348                                                       22533   -0.30   -0.27  1.0000
   2   3  -3   20037    1343                                                       19909   -0.30   -0.27  1.0000
  -1  -3   2   11267    1133                                                       19977   23.55   -0.36  1.0000
  -1  -3   2   10582    1326                                                       19061   23.55   -0.36  1.0000
  -1  -3   2   11053    1137                                                       19692   23.55   -0.36  1.0000
  -1  -3   2   11917    1324                                                       20840   23.55   -0.36  1.0000
  -1  -3   2   11138    1479                                                       19805   23.55   -0.36  1.0000
   1   3  -2   10682    1200                                                       19196   23.55    0.36  1.0000
   1   3  -2   10511    1203                                                       18966   23.55    0.36  1.0000
   0  -3   1    4657    1010                                                       16346   39.88   -0.42  1.0000
   0  -3   1    3799    1125                                                       14700   39.88   -0.42  1.0000
   0  -3   1    4088     871                                                       15263   39.88   -0.42  1.0000
   0   3  -1    3854     871                                                       14807   39.88    0.42  1.0000
   0   3  -1    3836     792                                                       14773   39.88    0.42  1.0000
   0   3  -1    3680     868                                                       14465   39.88    0.42  1.0000
   1  -3   0   11149     949                                                       15538  -12.75    0.07  1.0000
   1  -3   0   10763    1002                                                       15081  -12.75    0.07  1.0000
   1  -3   0   12597    1101                                                       17239  -12.75    0.07  1.0000
   1  -3   0   11068    1005                                                       15442  -12.75    0.07  1.0000
  -1   3   0   11920     863                                                       16446  -12.75   -0.07  1.0000
  -1   3   0   12821     950                                                       17501  -12.75   -0.07  1.0000
  -1   3   0   12922    1007                                                       17619  -12.75   -0.07  1.0000
   2  -3  -1     313       6                                                          21   -8.77    0.14  1.0000
   2  -3  -1     331       8                                                          26   -8.77    0.14  1.0000
   2  -3  -1     349       7                                                          31   -8.77    0.14  1.0000
   2  -3  -1     342       8                                                          29   -8.77    0.14  1.0000
  -2   3   1     297       6                                                          17   -8.77   -0.14  1.0000
  -2   3   1     293       6                                                          16   -8.77   -0.14  1.0000
  -2   3   1     324       8                                                          24   -8.77   -0.14  1.0000
  -2   3   1     309       7                                                          20   -8.77   -0.14  1.0000
   3  -3  -2     890      56                                                         838    0.59    0.04  1.0000
   3  -3  -2     980      59                                                         926    0.59    0.04  1.0000
   3  -3  -2     848      58                                                         797    0.59    0.04  1.0000
   3  -3  -2     898      64                                                         846    0.59    0.04  1.0000
  -3   3   2     929      59                                                         876    0.59   -0.04  1.0000
  -3   3   2     995      73                                                         940    0.59   -0.04  1.0000
  -3   3   2     902      51                                                         850    0.59   -0.04  1.0000
  -3   3   2     840      64                                                         790    0.59   -0.04  1.0000
  -3   3   2     920      56                                                         867    0.59   -0.04  1.0000
   4  -3  -3     132       7                                                          -4   -7.70   -0.04  1.0000
   4  -3  -3     102       7                                                           2   -7.70   -0.04  1.0000
   4  -3  -3     132       6                                                          -3   -7.70   -0.04  1.0000
   4  -3  -3     102       4                                                           2   -7.70   -0.04  1.0000
  -4   3   3      76       7                                                           8   -7.70    0.04  1.0000
  -4   3   3     132       4                                                          -5   -7.70    0.04  1.0000
  -4   3   3     110       5                                                           1   -7.70    0.04  1.0000
  -4   3   3     132       6                                                          -2   -7.70    0.04  1.0000
  -4   3   3      86       7                                                           5   -7.70    0.04  1.0000
  -4   3   3      86       6                                                           5   -7.70    0.04  1.0000
   5  -3  -4    1360      53                                                         828   -5.43   -0.02  1.0000
   5  -3  -4    1372      55                                                         837   -5.43   -0.02  1.0000
   5  -3  -4    1209      60                                                         711   -5.43   -0.02  1.0000
  -5   3   4    1054      50                                                         593   -5.43    0.02  1.0000
  -5   3   4    1321      48                                                         797   -5.43    0.02  1.0000
  -5   3   4    1225      53                                                         723   -5.43    0.02  1.0000
  -5   3   4    1237      55                                                         732   -5.43    0.02  1.0000
  -5   3   4    1214      67                                                         715   -5.43    0.02  1.0000
  -5   3   4    1325      61                                                         800   -5.43    0.02  1.0000
   6  -3  -5     359      56                                                         720    5.28   -0.13  1.0000
   6  -3  -5     340      53                                                         693    5.28   -0.13  1.0000
  -6   3   5     406      56                                                         787    5.28    0.13  1.0000
  -6   3   5     349      48                                                         707    5.28    0.13  1.0000
  -6   3   5     461      55                                                         863    5.28    0.13  1.0000
  -6   3   5     267      67                                                         587    5.28    0.13  1.0000
  -6   3   5     426      55                                                         814    5.28    0.13  1.0000
  -6   3   5     432      63                                                         823    5.28    0.13  1.0000
   7  -3  -6    3395     162                                                        2527    5.36    0.39  1.0000
   7  -3  -6    3707     172                                                        2797    5.36    0.39  1.0000
  -7   3   6    3441     163                                                        2567    5.36   -0.39  1.0000
  -7   3   6    3451     188                                                        2575    5.36   -0.39  1.0000
  -7   3   6    3437     162                                                        2563    5.36   -0.39  1.0000
   8  -3  -7     138      27                                                         237    2.45    0.28  1.0000
  -8   3   7     142      27                                                         242    2.45   -0.28  1.0000
  -8   3   7     103      25                                                         191    2.45   -0.28  1.0000
   9  -3  -8       0      13                                                          14   -2.14   -0.02  1.0000
  -9   3   8      20      16                                                          59   -2.14    0.02  1.0000
  -9   3   8      18      15                                                          56   -2.14    0.02  1.0000
  10  -3  -9      69      28                                                         175   -3.31    0.16  1.0000
 -10   3   9      95      27                                                         216   -3.31   -0.16  1.0000
 -10   3   9     106      28                                                         232   -3.31   -0.16  1.0000
  11  -3 -10      42      18                                                          59   -0.79    0.20  1.0000
 -11   3  10      27      17                                                          41   -0.79   -0.20  1.0000
 -11   3  10      32      17                                                          47   -0.79   -0.20  1.0000
  12  -3 -11      60      25                                                          63    0.12    0.02  1.0000
 -12   3  11      81      23                                                          84    0.12   -0.02  1.0000
 -12   3  11      69      20                                                          72    0.12   -0.02  1.0000
 -11  -4  12      89      24                                                         115    0.85   -0.04  1.0000
  11   4 -12      90      24                                                         116    0.85    0.04  1.0000
 -10  -4  11     127      24                                                         150    0.66   -0.01  1.0000
 -10  -4  11     105      20                                                         126    0.66   -0.01  1.0000
  -9  -4  10     102      20                                                         149   -1.40   -0.26  1.0000
  -9  -4  10     111      20                                                         160   -1.40   -0.26  1.0000
  -9  -4  10     101      21                                                         148   -1.40   -0.26  1.0000
  -8  -4   9     187      18                                                         158   -0.75    0.16  1.0000
  -8  -4   9     143      19                                                         118   -0.75    0.16  1.0000
  -8  -4   9     188      18                                                         159   -0.75    0.16  1.0000
  -7  -4   8     624      37                                                         512   -1.58    0.06  1.0000
  -7  -4   8     601      37                                                         491   -1.58    0.06  1.0000
  -7  -4   8     567      42                                                         460   -1.58    0.06  1.0000
  -6  -4   7       2      12                                                          64   -6.34   -0.11  1.0000
  -6  -4   7       2      11                                                          66   -6.34   -0.11  1.0000
  -6  -4   7       6      12                                                          51   -6.34   -0.11  1.0000
   6   4  -7      13      10                                                          34   -6.34    0.11  1.0000
  -5  -4   6      74      23                                                         293    5.71    0.23  1.0000
  -5  -4   6      67      29                                                         279    5.71    0.23  1.0000
  -5  -4   6     106      29                                                         354    5.71    0.23  1.0000
  -5  -4   6      76      24                                                         298    5.71    0.23  1.0000
  -5  -4   6      81      27                                                         307    5.71    0.23  1.0000
   5   4  -6      71      24                                                         287    5.71   -0.23  1.0000
  -4  -4   5     378      99                                                        1533   13.18    0.06  1.0000
  -4  -4   5     329      84                                                        1431   13.18    0.06  1.0000
  -4  -4   5     291     108                                                        1351   13.18    0.06  1.0000
  -4  -4   5     315      97                                                        1402   13.18    0.06  1.0000
  -4  -4   5     299      84                                                        1368   13.18    0.06  1.0000
   4   4  -5     289      89                                                        1348   13.18   -0.06  1.0000
   4   4  -5     265      89                                                        1295   13.18   -0.06  1.0000
  -3  -4   4    3401     283                                                        3711    1.74   -0.07  1.0000
  -3  -4   4    3353     219                                                        3661    1.74   -0.07  1.0000
  -3  -4   4    3539     254                                                        3855    1.74   -0.07  1.0000
  -3  -4   4    3961     255                                                        4295    1.74   -0.07  1.0000
  -3  -4   4    3426     220                                                        3737    1.74   -0.07  1.0000
   3   4  -4    3461     232                                                        3774    1.74    0.07  1.0000
   3   4  -4    3291     200                                                        3596    1.74    0.07  1.0000
   3   4  -4    3142     232                                                        3441    1.74    0.07  1.0000
  -2  -4   3    2874     111                                                        1758   -7.82   -0.03  1.0000
  -2  -4   3    2691     123                                                        1615   -7.82   -0.03  1.0000
  -2  -4   3    2653      96                                                        1586   -7.82   -0.03  1.0000
  -2  -4   3    2723     110                                                        1640   -7.82   -0.03  1.0000
  -2  -4   3    2636     110                                                        1573   -7.82   -0.03  1.0000
  -2  -4   3    2718      96                                                        1636   -7.82   -0.03  1.0000
  -2  -4   3    2688     124                                                        1613   -7.82   -0.03  1.0000
   2   4  -3    2626     101                                                        1565   -7.82    0.03  1.0000
   2   4  -3    2626     101                                                        1565   -7.82    0.03  1.0000
  -1  -4   2    9604     272                                                        4504  -20.67    0.75  1.0000
  -1  -4   2    9477     271                                                        4417  -20.67    0.75  1.0000
  -1  -4   2   10193     351                                                        4910  -20.67    0.75  1.0000
  -1  -4   2    9337     314                                                        4322  -20.67    0.75  1.0000
  -1  -4   2   10574     315                                                        5176  -20.67    0.75  1.0000
   0  -4   1     901      10                                                          64  -25.43    0.23  1.0000
   0  -4   1     958       8                                                          50  -25.43    0.23  1.0000
   0  -4   1     845      10                                                          80  -25.43    0.23  1.0000
   0  -4   1    1004       7                                                          40  -25.43    0.23  1.0000
   0  -4   1    1015       8                                                          38  -25.43    0.23  1.0000
   0   4  -1     901       8                                                          64  -25.43   -0.23  1.0000
   0   4  -1     953       8                                                          51  -25.43   -0.23  1.0000
   0   4  -1     916       7                                                          60  -25.43   -0.23  1.0000
   1  -4   0      53      61                                                         851   14.65   -0.48  1.0000
   1  -4   0      15      46                                                         667   14.65   -0.48  1.0000
   1  -4   0      15      48                                                         663   14.65   -0.48  1.0000
   1  -4   0      26      48                                                         730   14.65   -0.48  1.0000
  -1   4   0      20      46                                                         693   14.65    0.48  1.0000
  -1   4   0      16      46                                                         674   14.65    0.48  1.0000
  -1   4   0      29      51                                                         747   14.65    0.48  1.0000
  -1   4   0      25      43                                                         723   14.65    0.48  1.0000
   2  -4  -1      73      28                                                         310    6.05   -0.04  1.0000
   2  -4  -1      67      25                                                         297    6.05   -0.04  1.0000
   2  -4  -1      96      26                                                         355    6.05   -0.04  1.0000
   2  -4  -1      64      24                                                         290    6.05   -0.04  1.0000
  -2   4   1      81      28                                                         325    6.05    0.04  1.0000
  -2   4   1      79      28                                                         321    6.05    0.04  1.0000
  -2   4   1      94      26                                                         350    6.05    0.04  1.0000
  -2   4   1      88      24                                                         339    6.05    0.04  1.0000
  -2   4   1      94      26                                                         351    6.05    0.04  1.0000
   3  -4  -2      66      13                                                          88    0.84    0.07  1.0000
   3  -4  -2      62      13                                                          83    0.84    0.07  1.0000
   3  -4  -2      64      12                                                          86    0.84    0.07  1.0000
   3  -4  -2      82      13                                                         106    0.84    0.07  1.0000
  -3   4   2      80      15                                                         104    0.84   -0.07  1.0000
  -3   4   2      54      12                                                          74    0.84   -0.07  1.0000
  -3   4   2      86      14                                                         111    0.84   -0.07  1.0000
  -3   4   2      46      11                                                          65    0.84   -0.07  1.0000
  -3   4   2      63      13                                                          84    0.84   -0.07  1.0000
   4  -4  -3     650      21                                                         180    8.08   -0.04  1.0000
   4  -4  -3     586      18                                                         147    8.08   -0.04  1.0000
   4  -4  -3     669      20                                                         190    8.08   -0.04  1.0000
   4  -4  -3     669      18                                                         190    8.08   -0.04  1.0000
  -4   4   3     656      19                                                         183    8.08    0.04  1.0000
  -4   4   3     588      20                                                         148    8.08    0.04  1.0000
  -4   4   3     629      18                                                         169    8.08    0.04  1.0000
  -4   4   3     658      19                                                         184    8.08    0.04  1.0000
  -4   4   3     673      22                                                         192    8.08    0.04  1.0000
  -4   4   3     635      24                                                         172    8.08    0.04  1.0000
   5  -4  -4    8732     686                                                        9533    2.80    0.17  1.0000
   5  -4  -4   10511     652                                                       11388    2.80    0.17  1.0000
   5  -4  -4   10046     689                                                       10903    2.80    0.17  1.0000
[truncated: 2,824,817 more chars]
